# Supplementary material
Source: PubMed Central journal article supplement (PMC3303594)

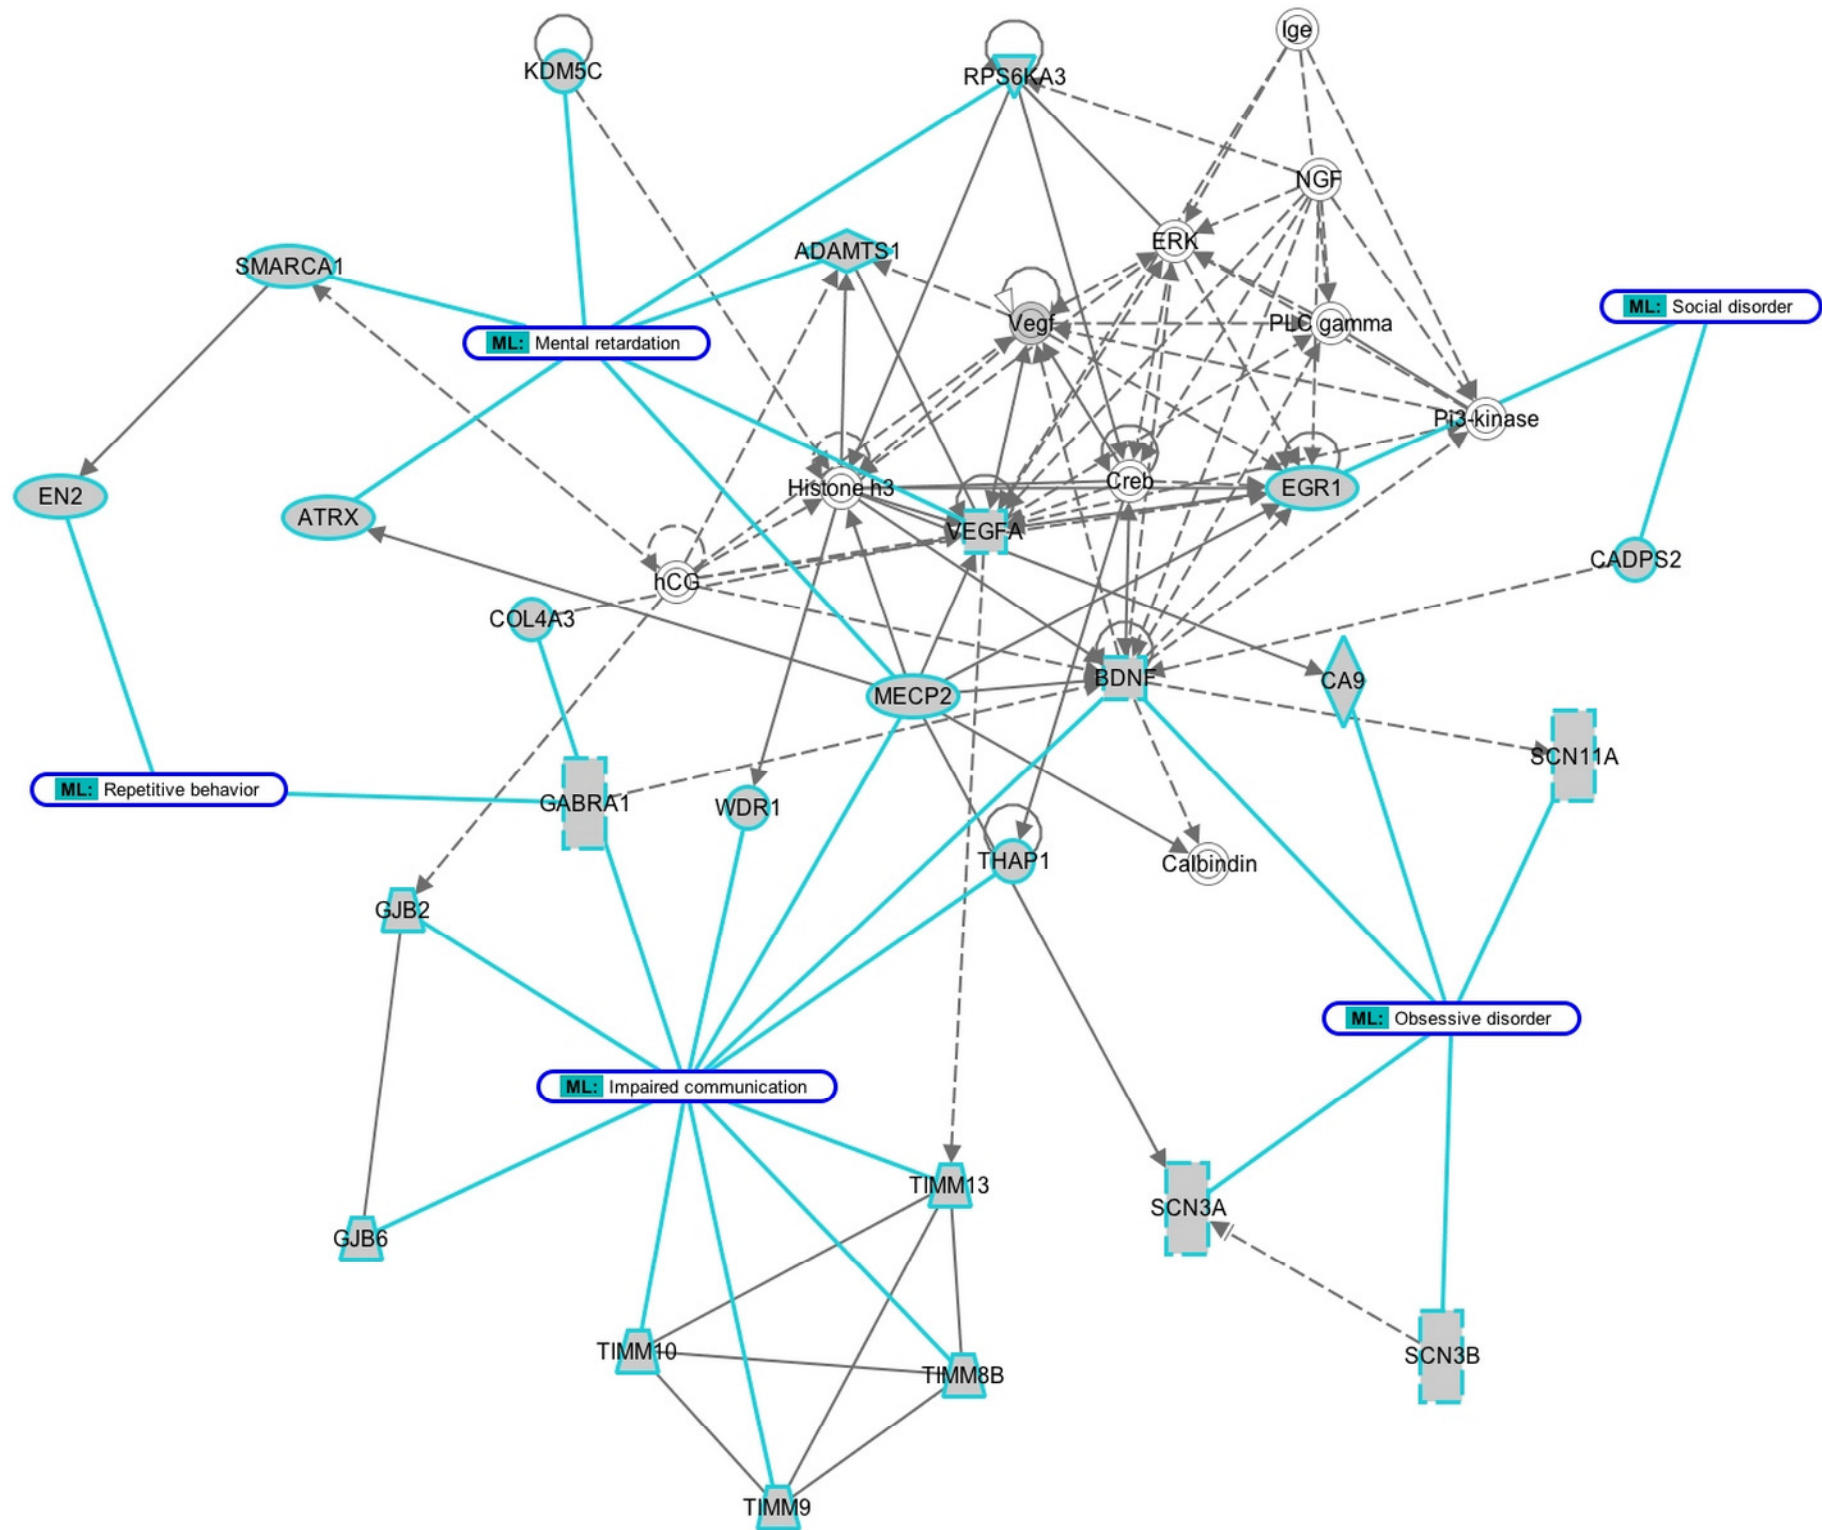

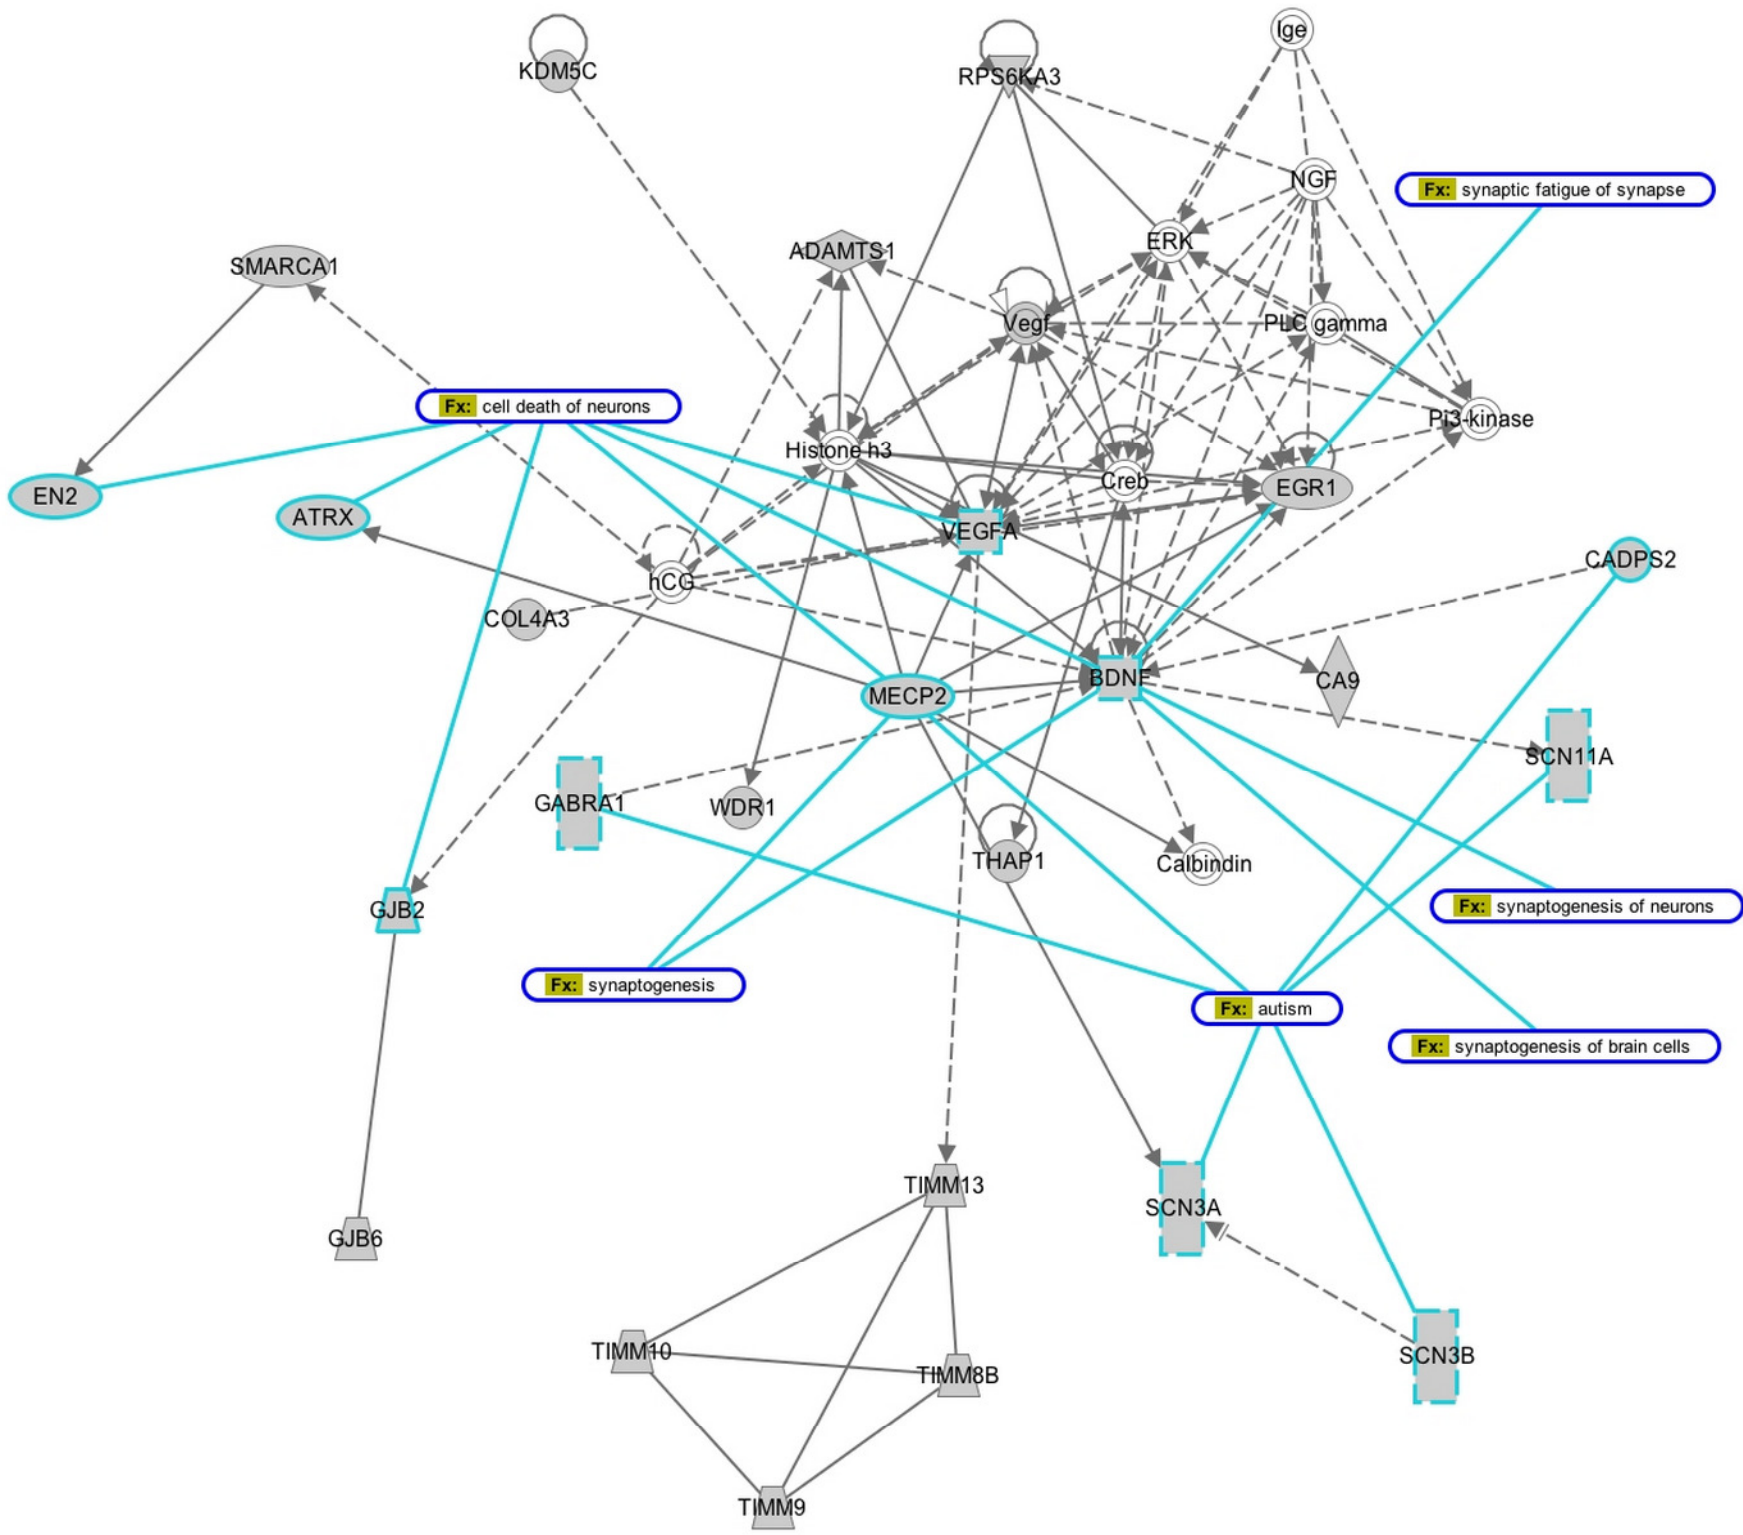

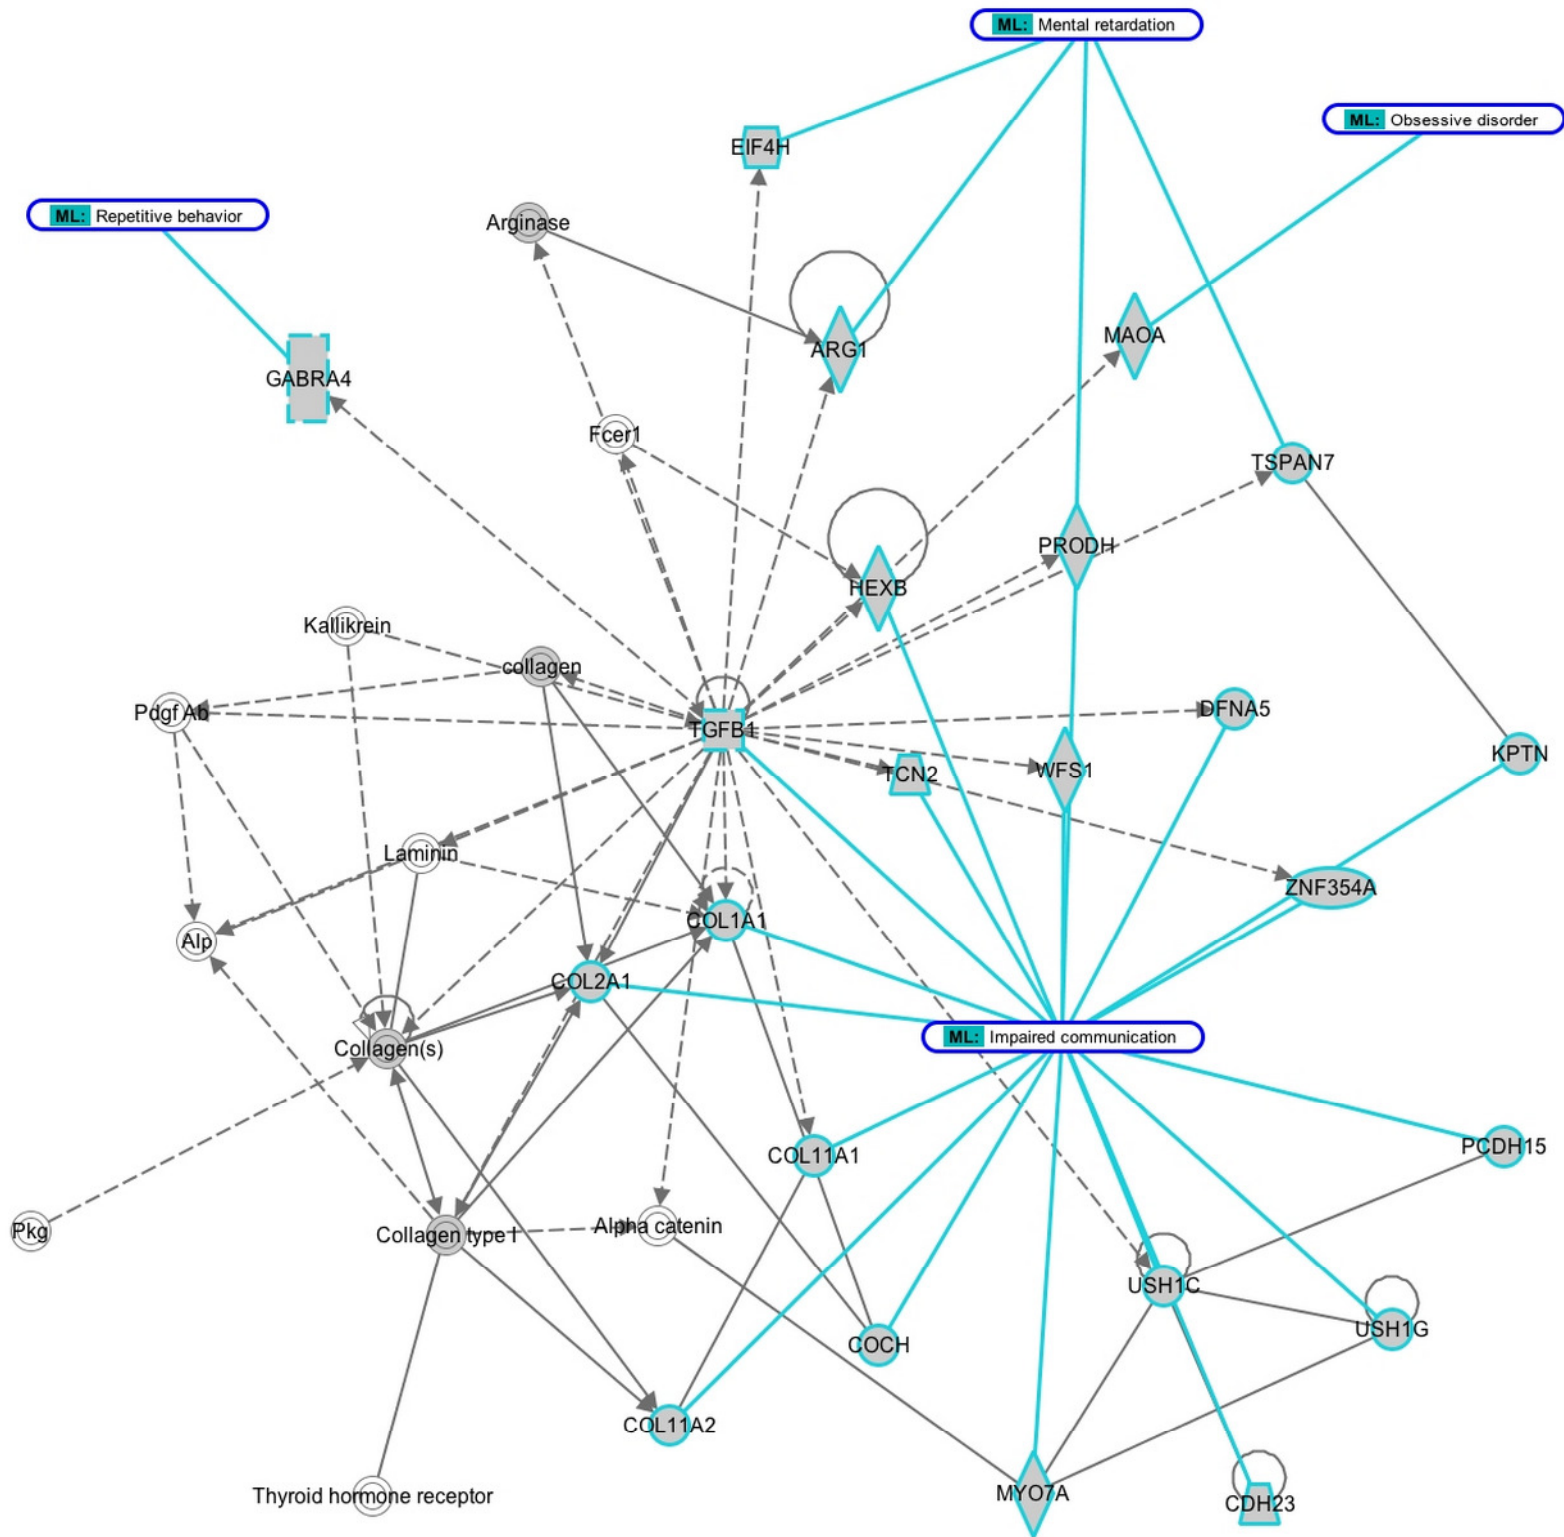



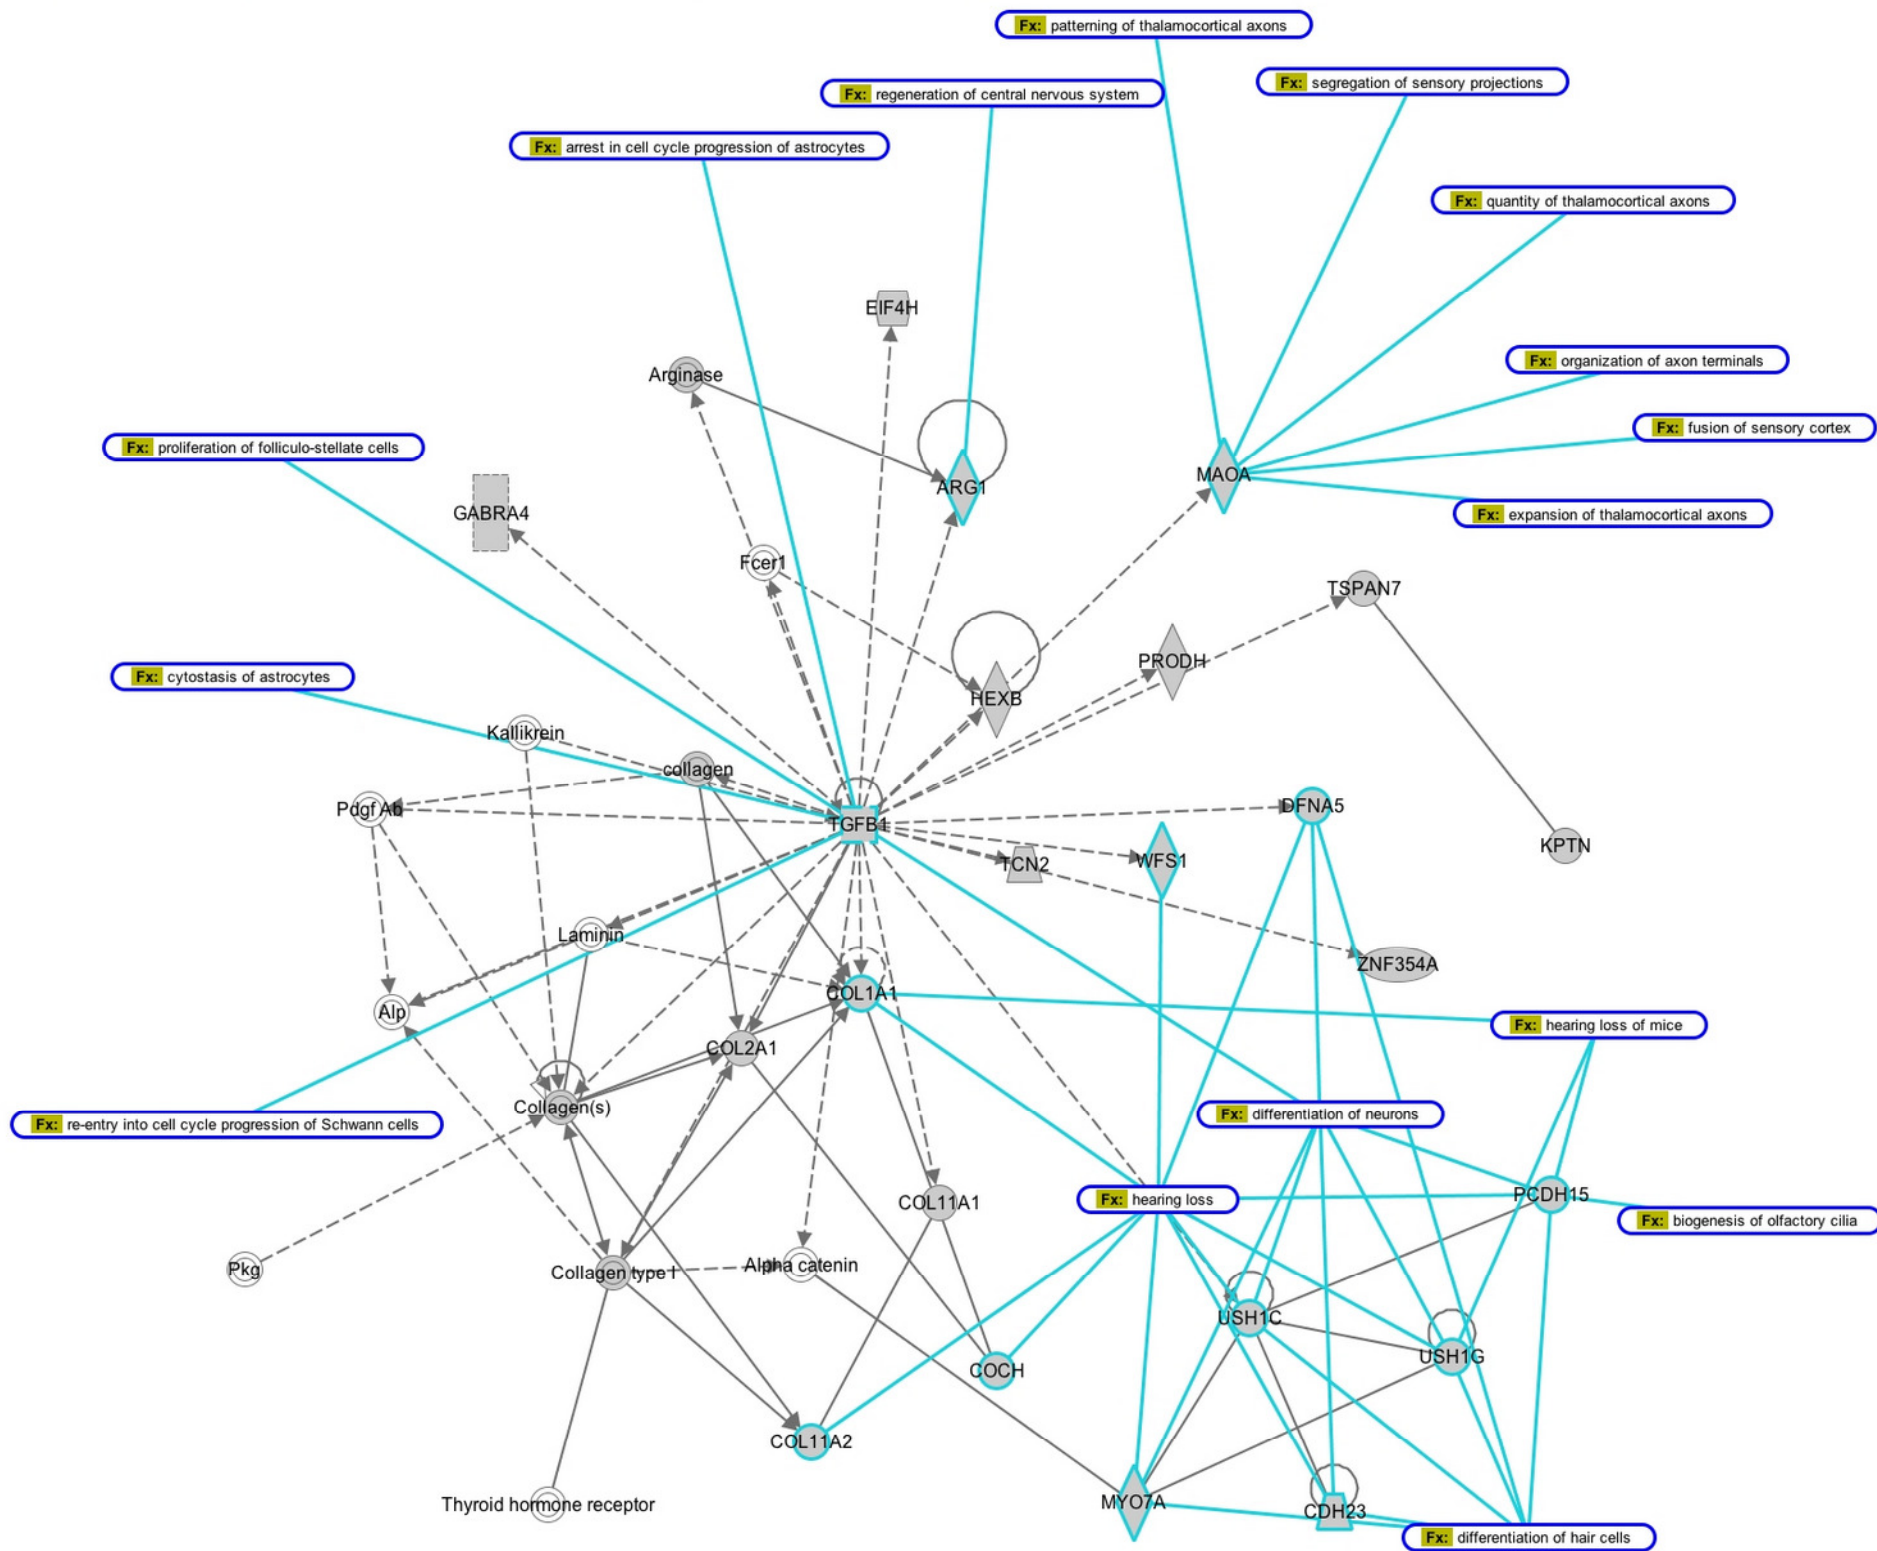



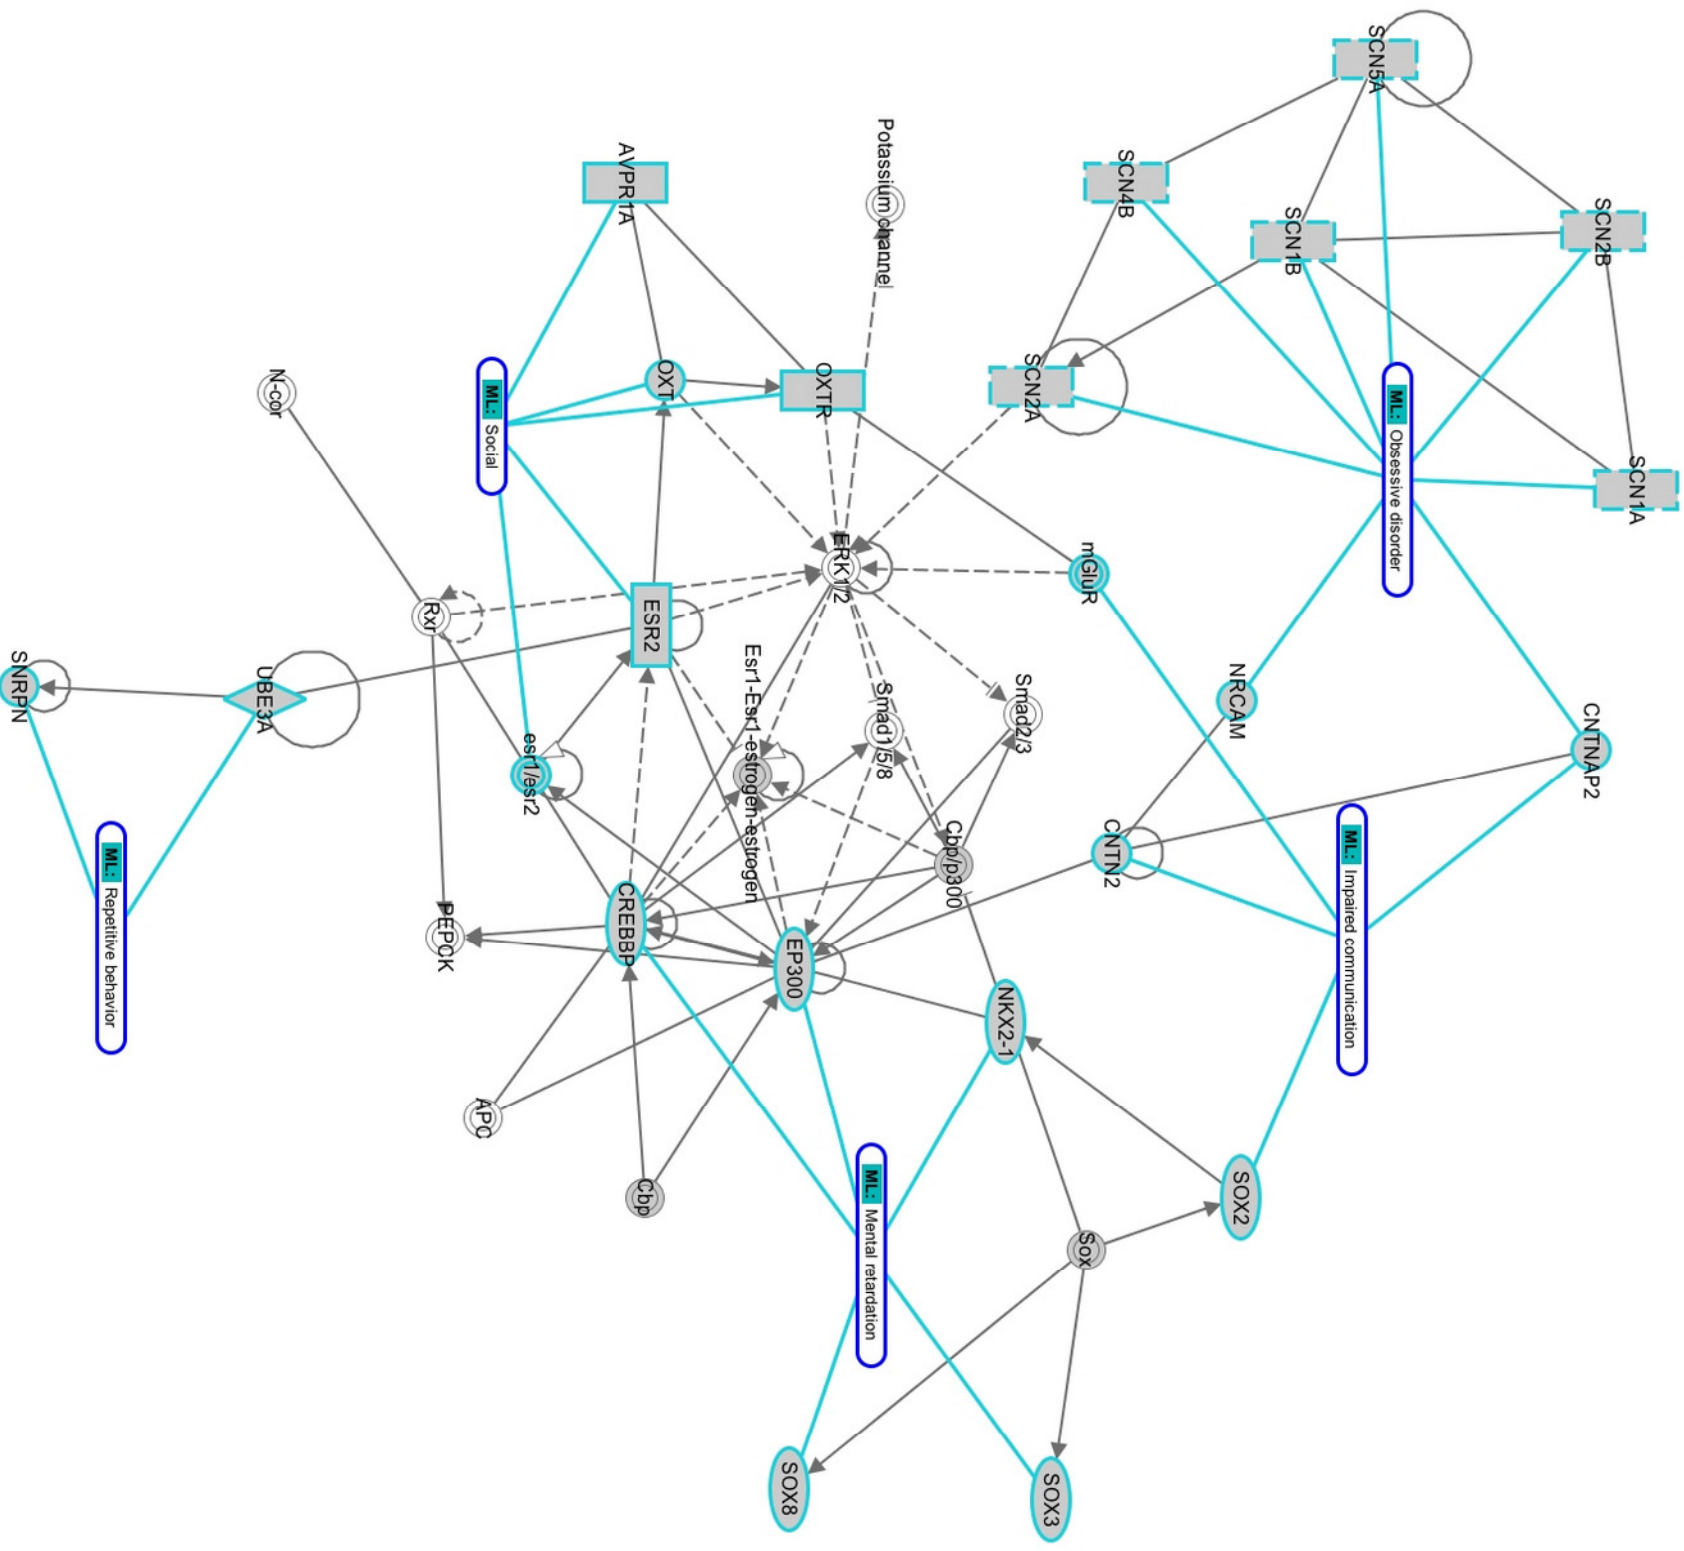

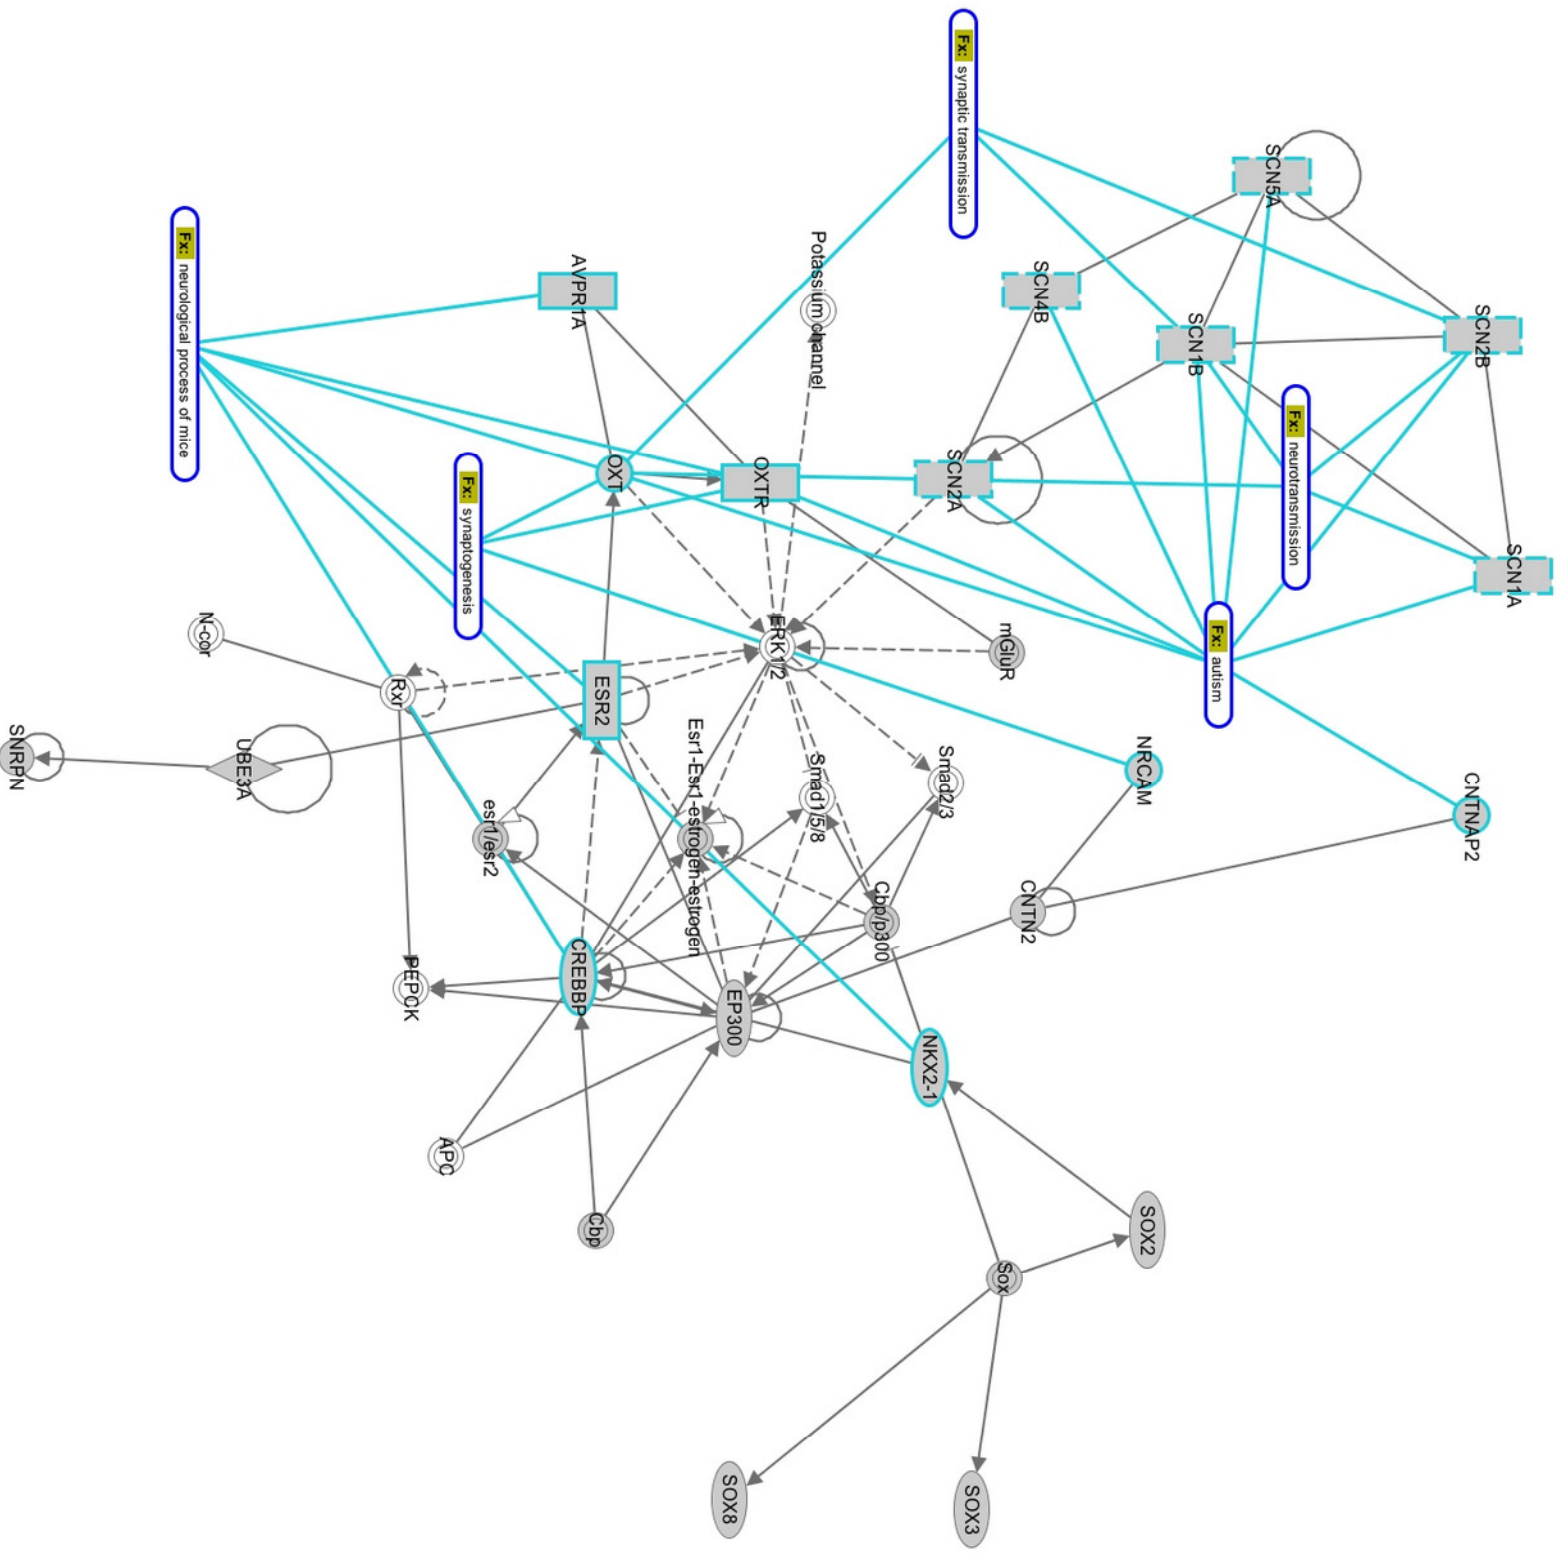





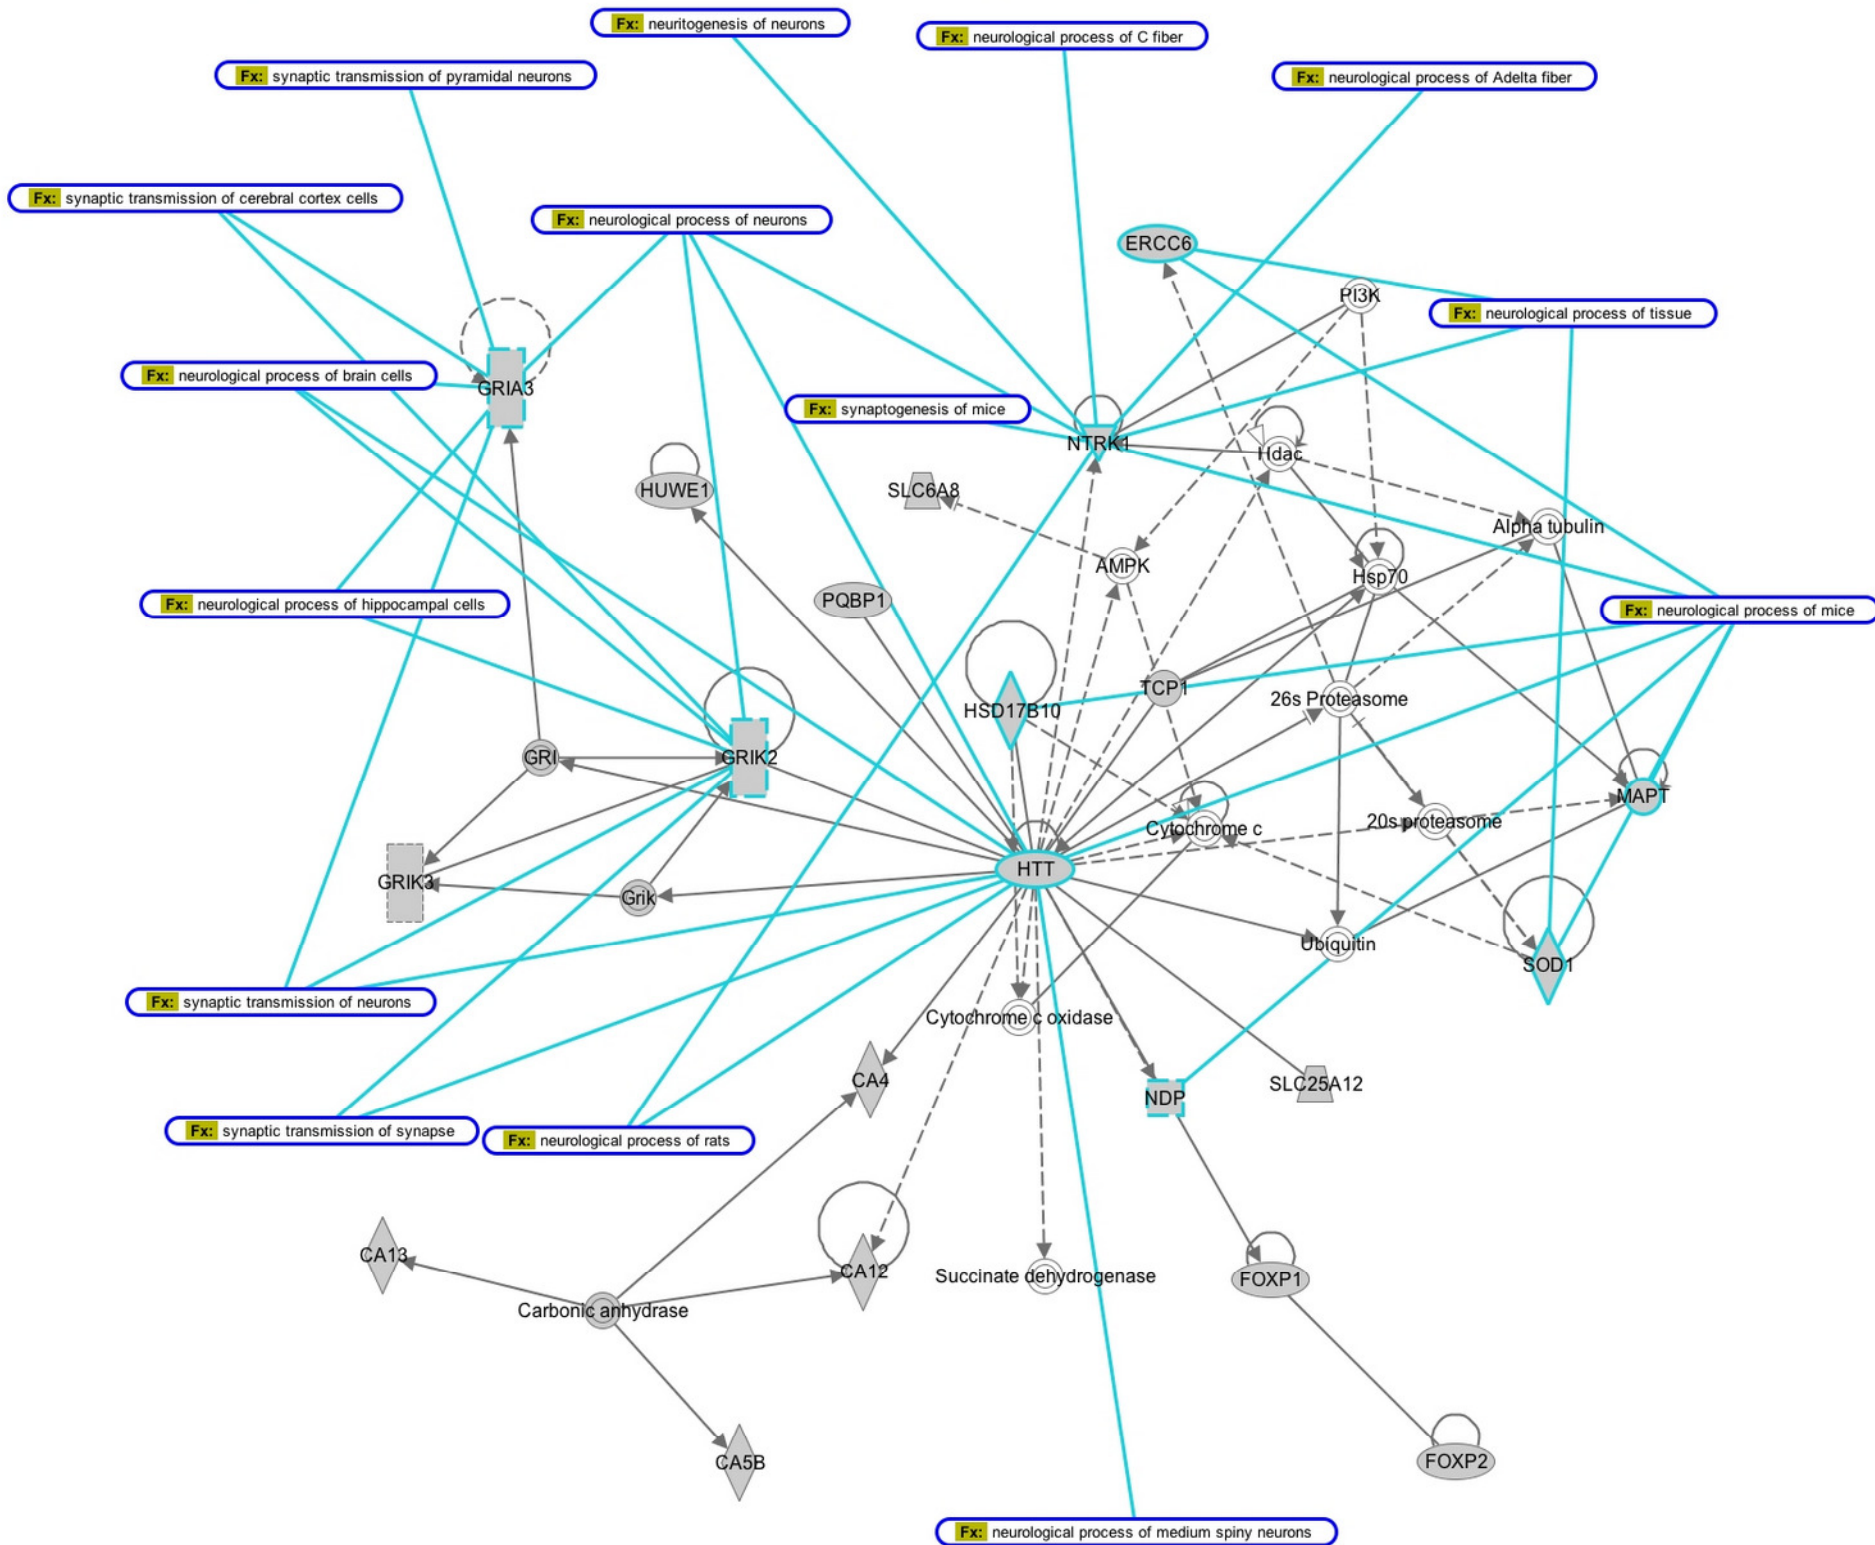

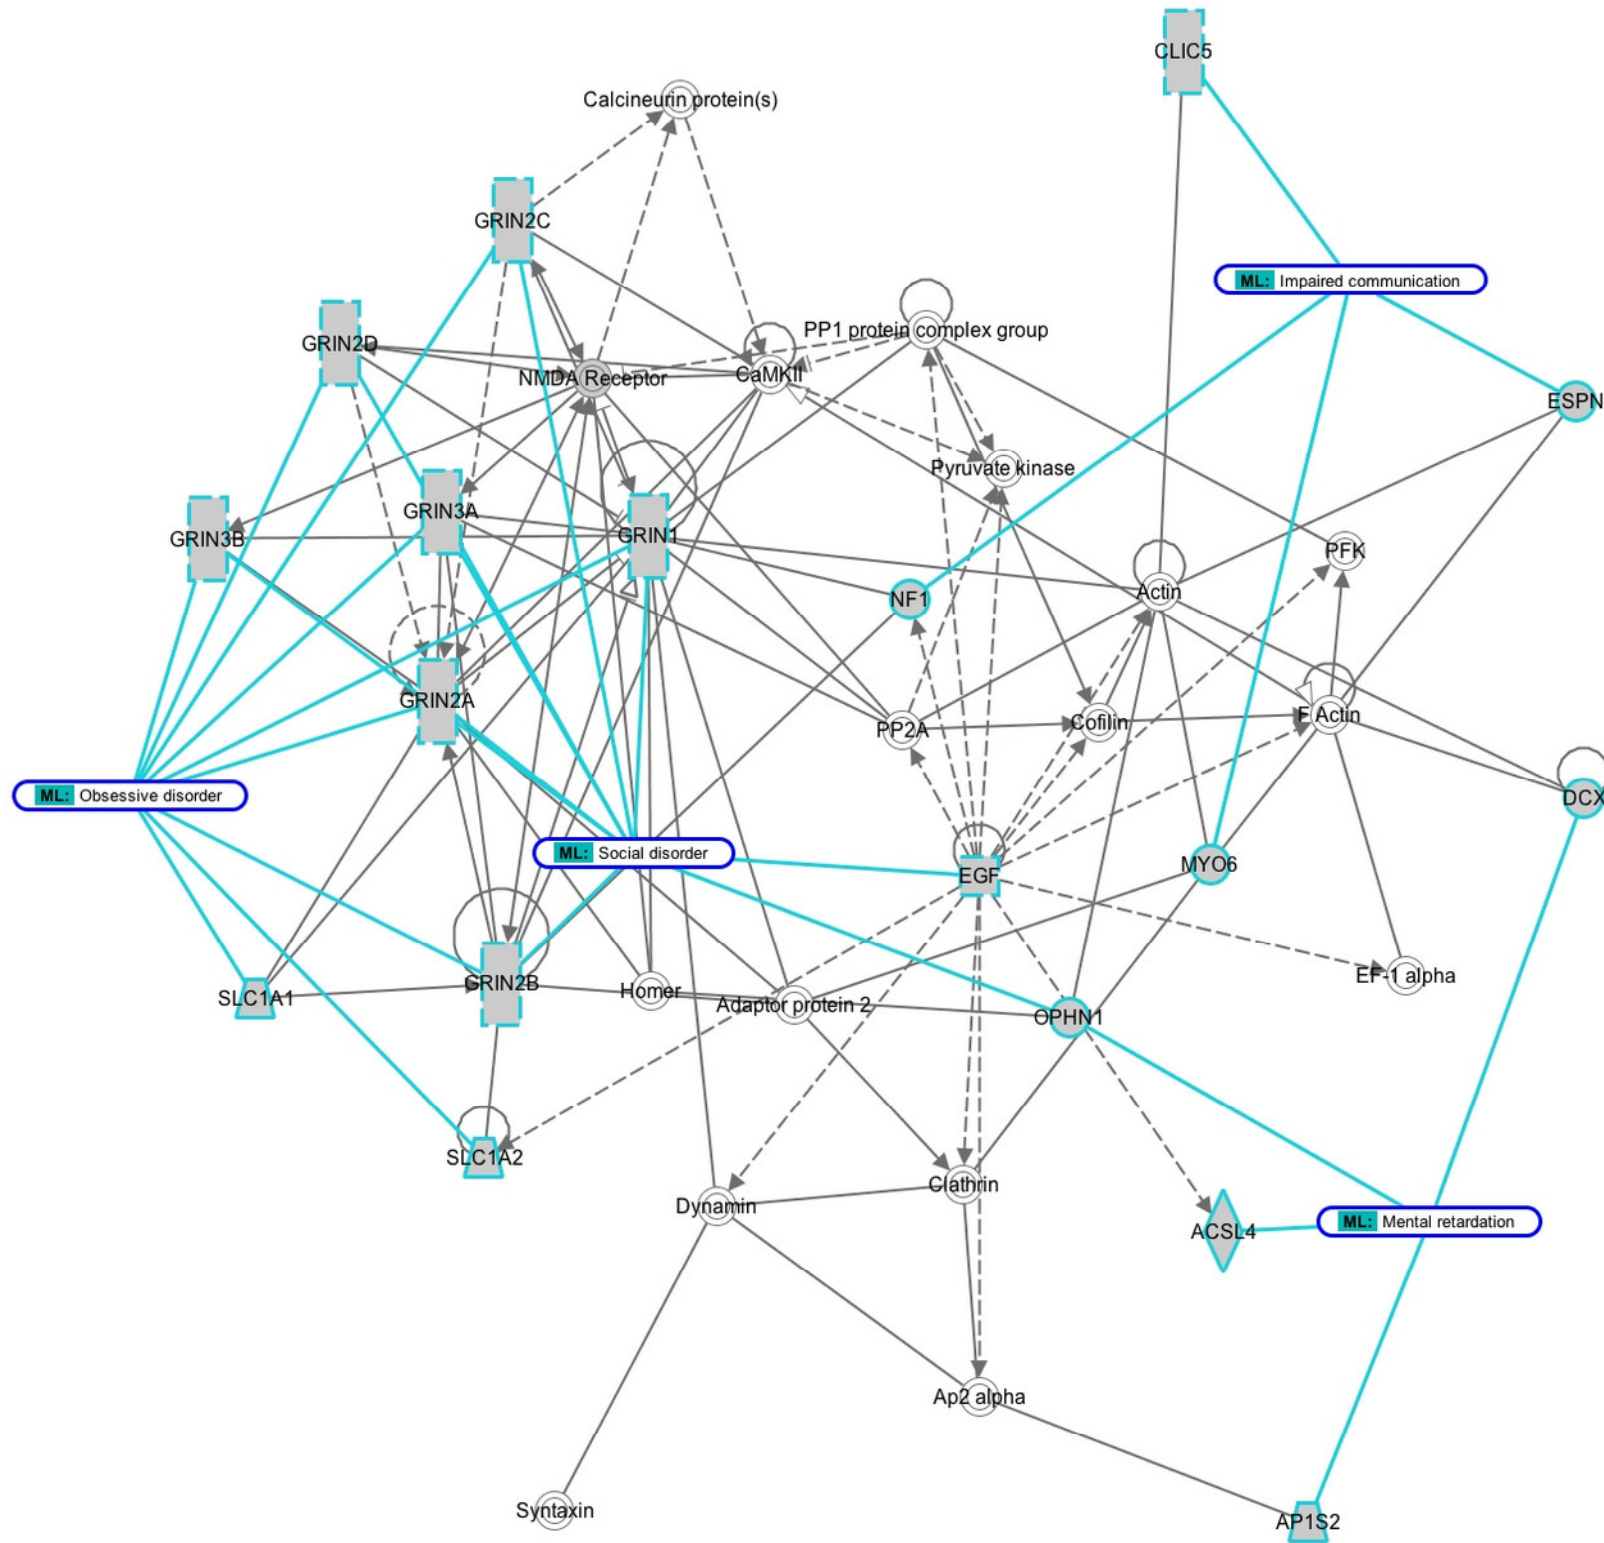

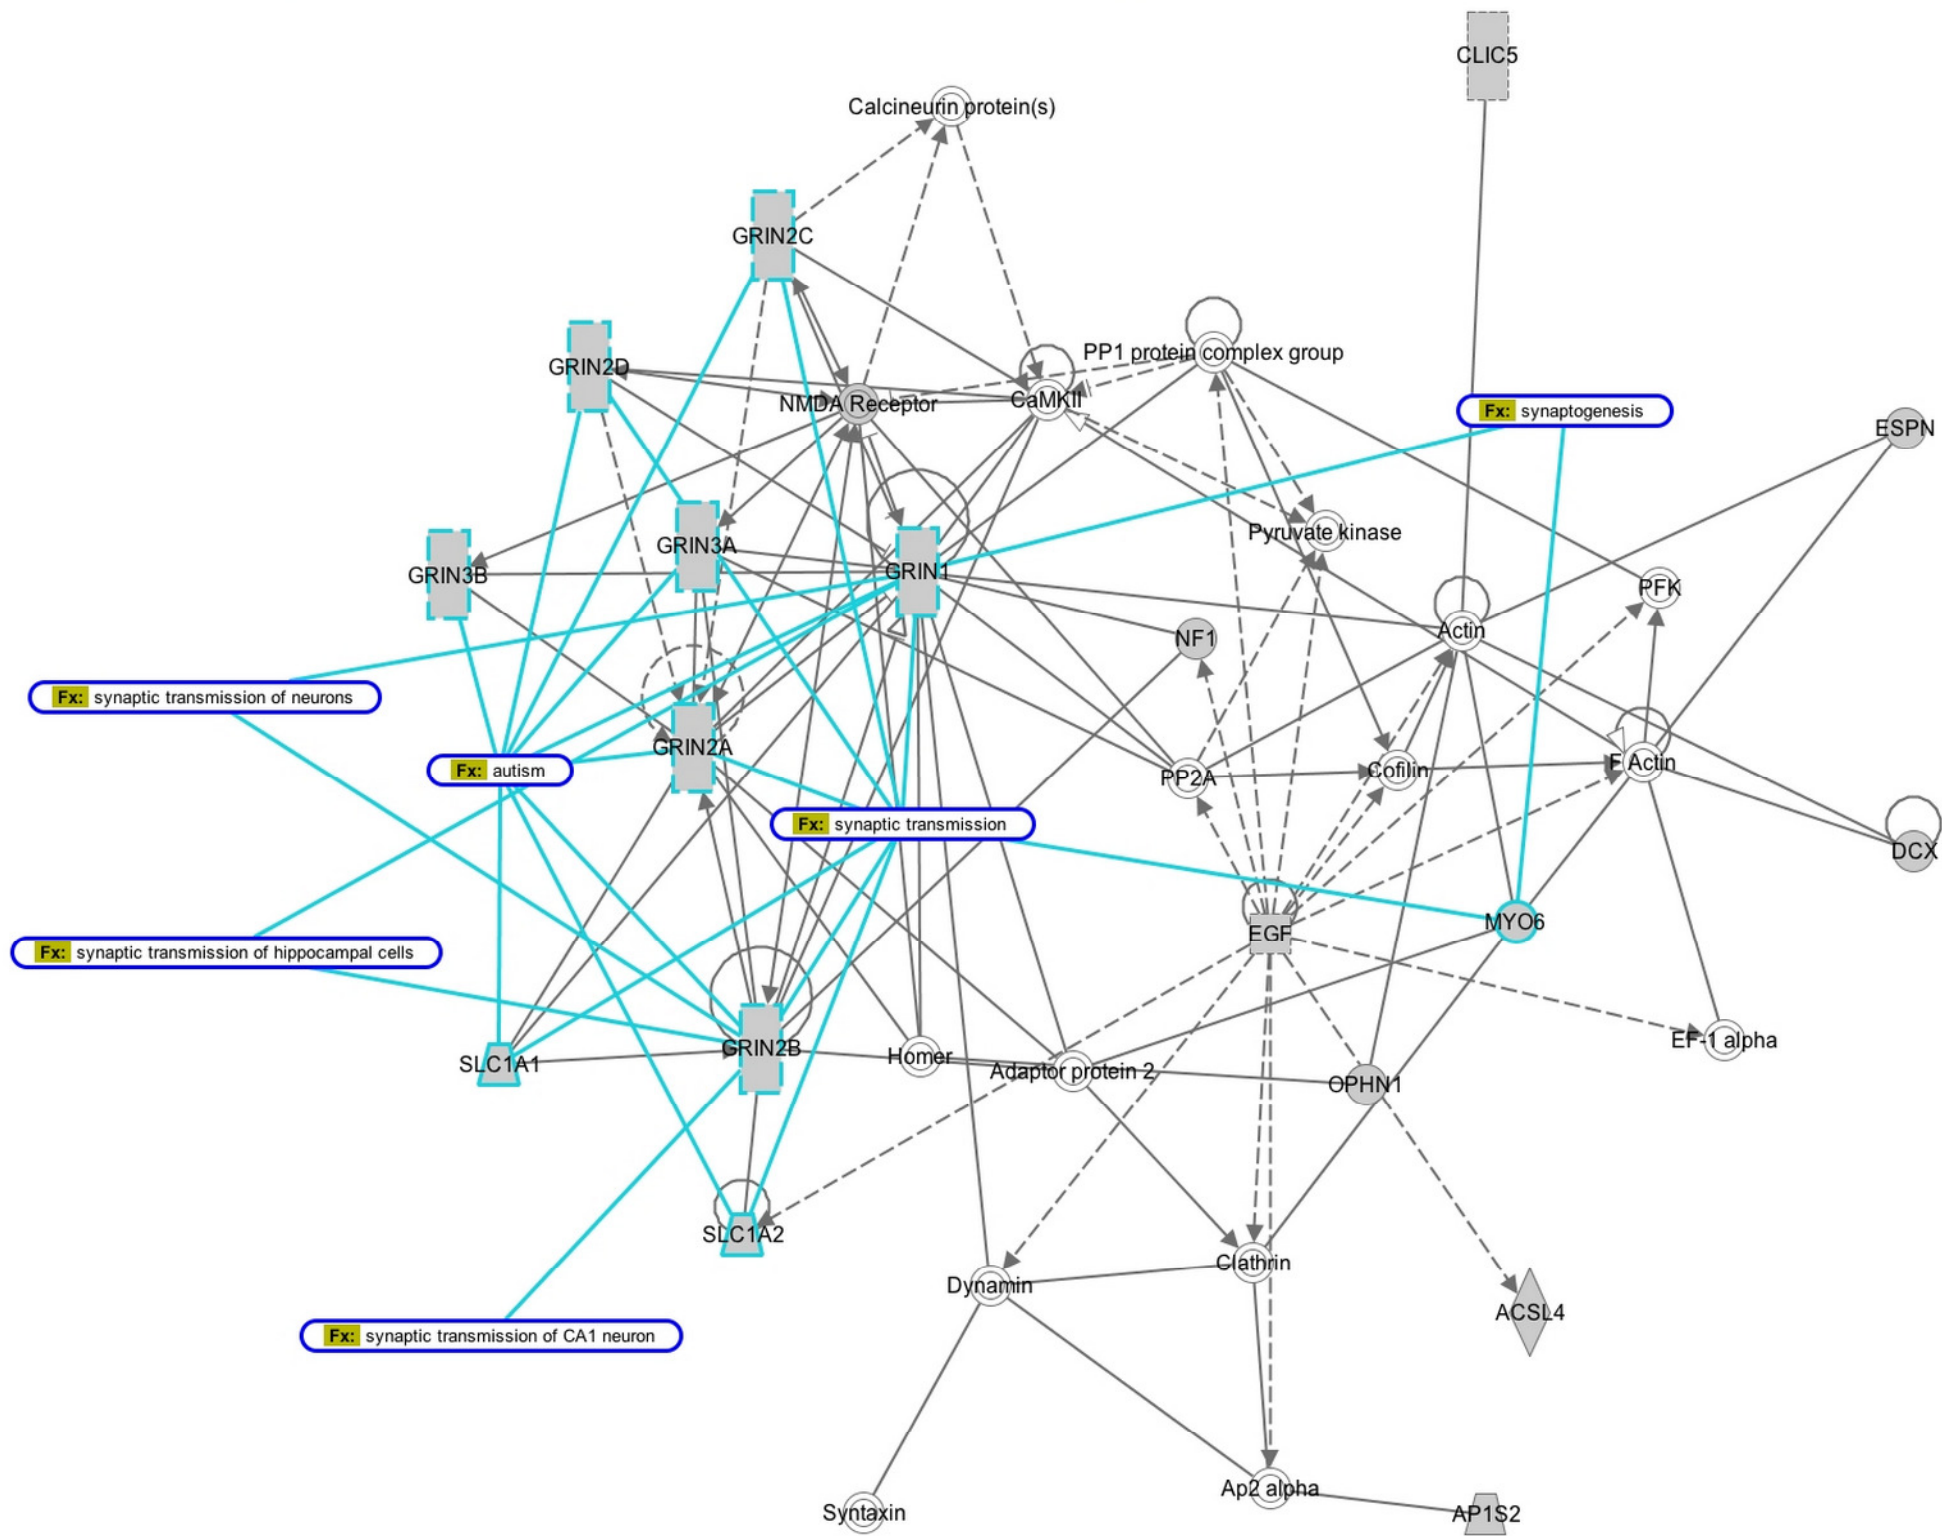



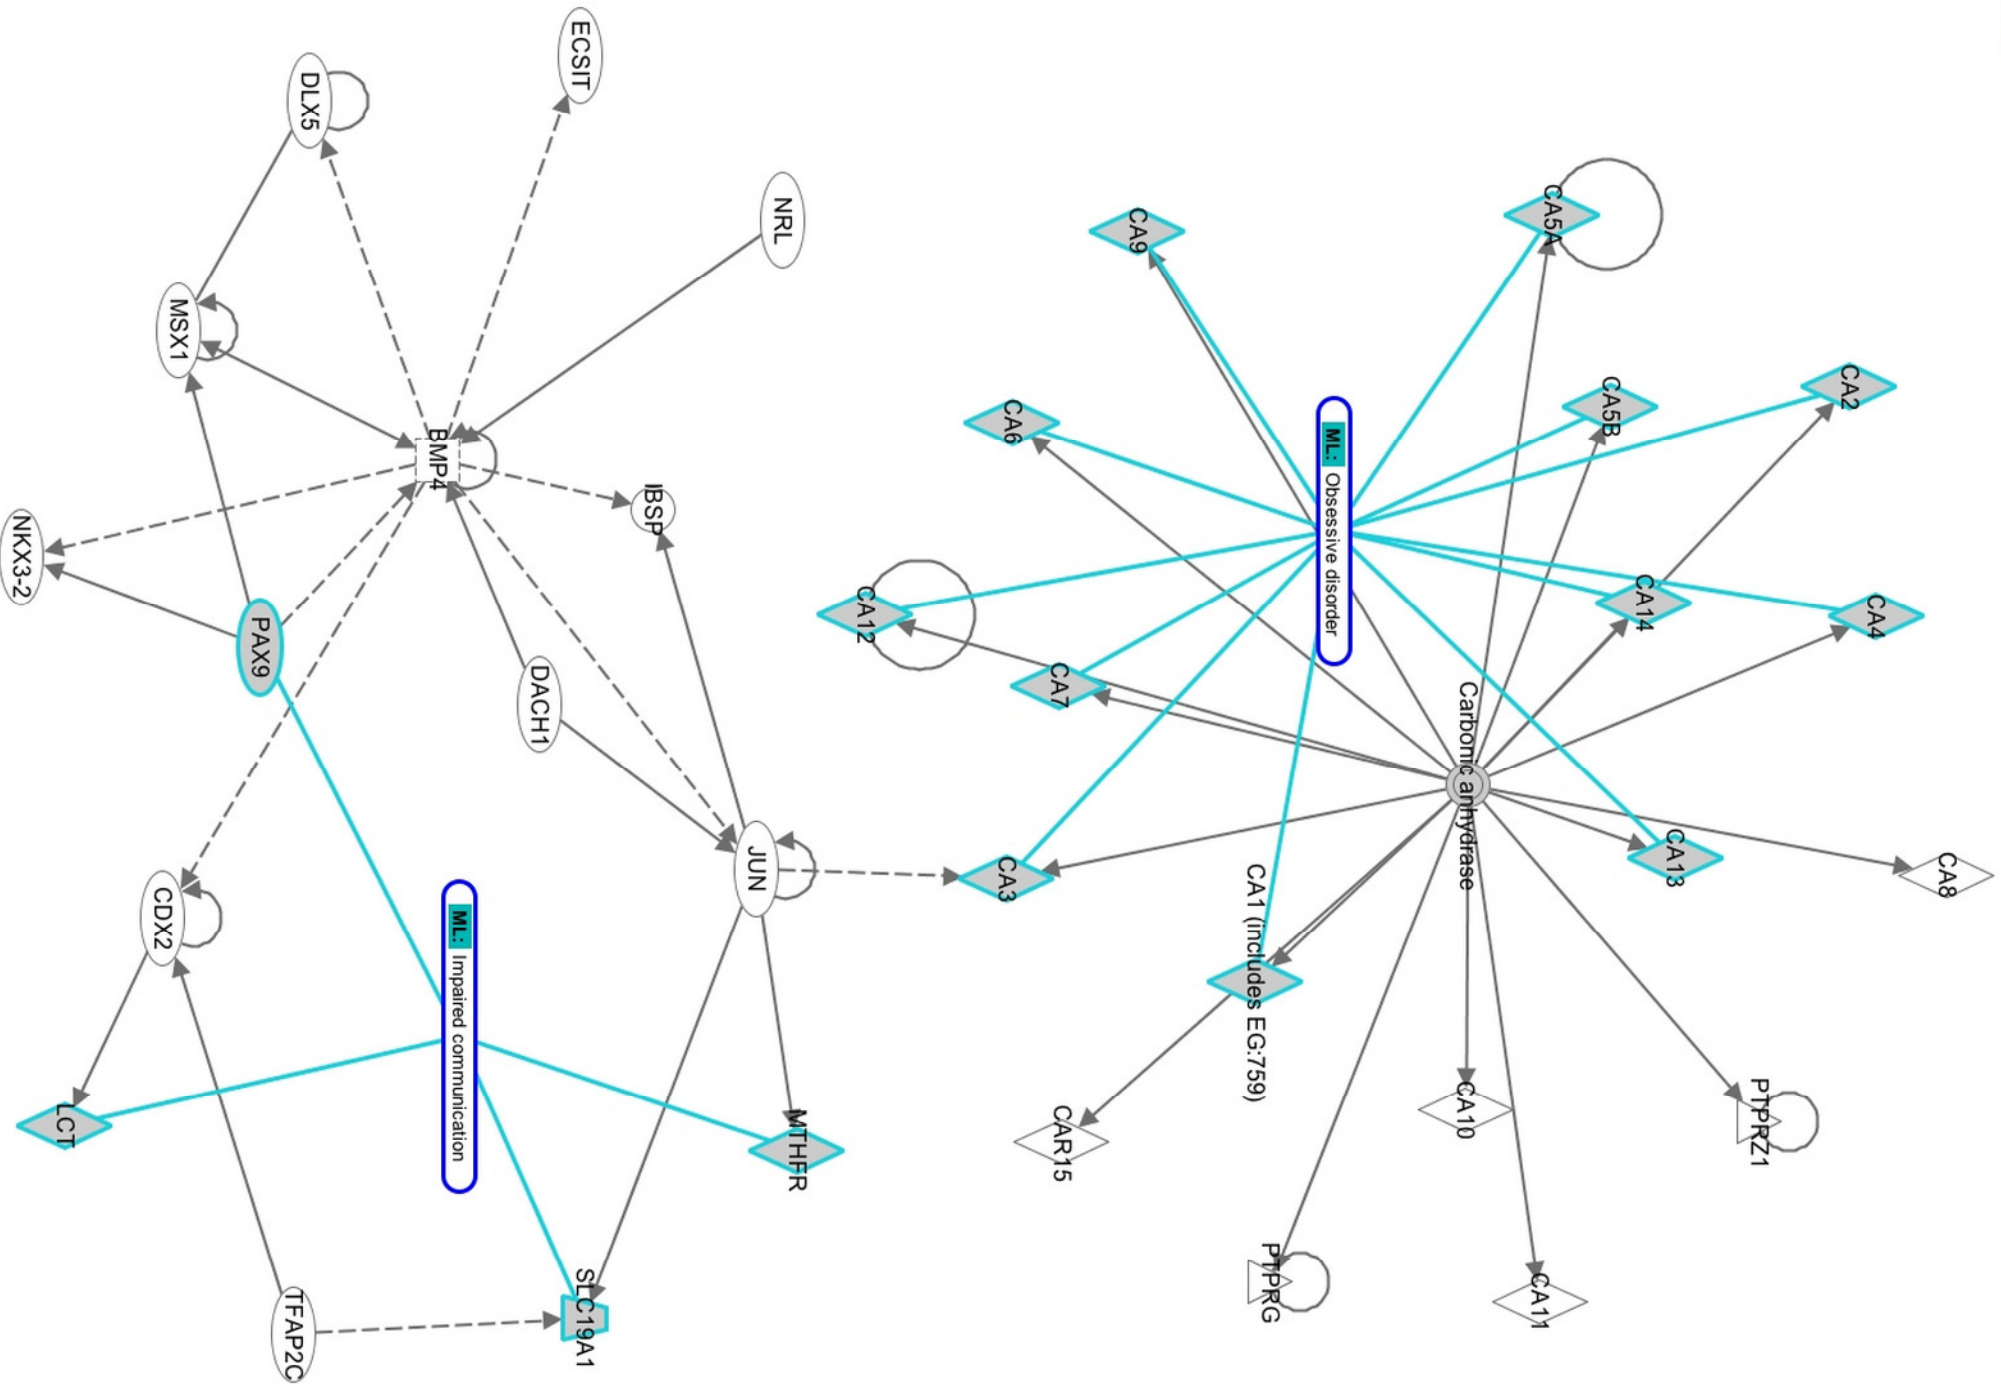

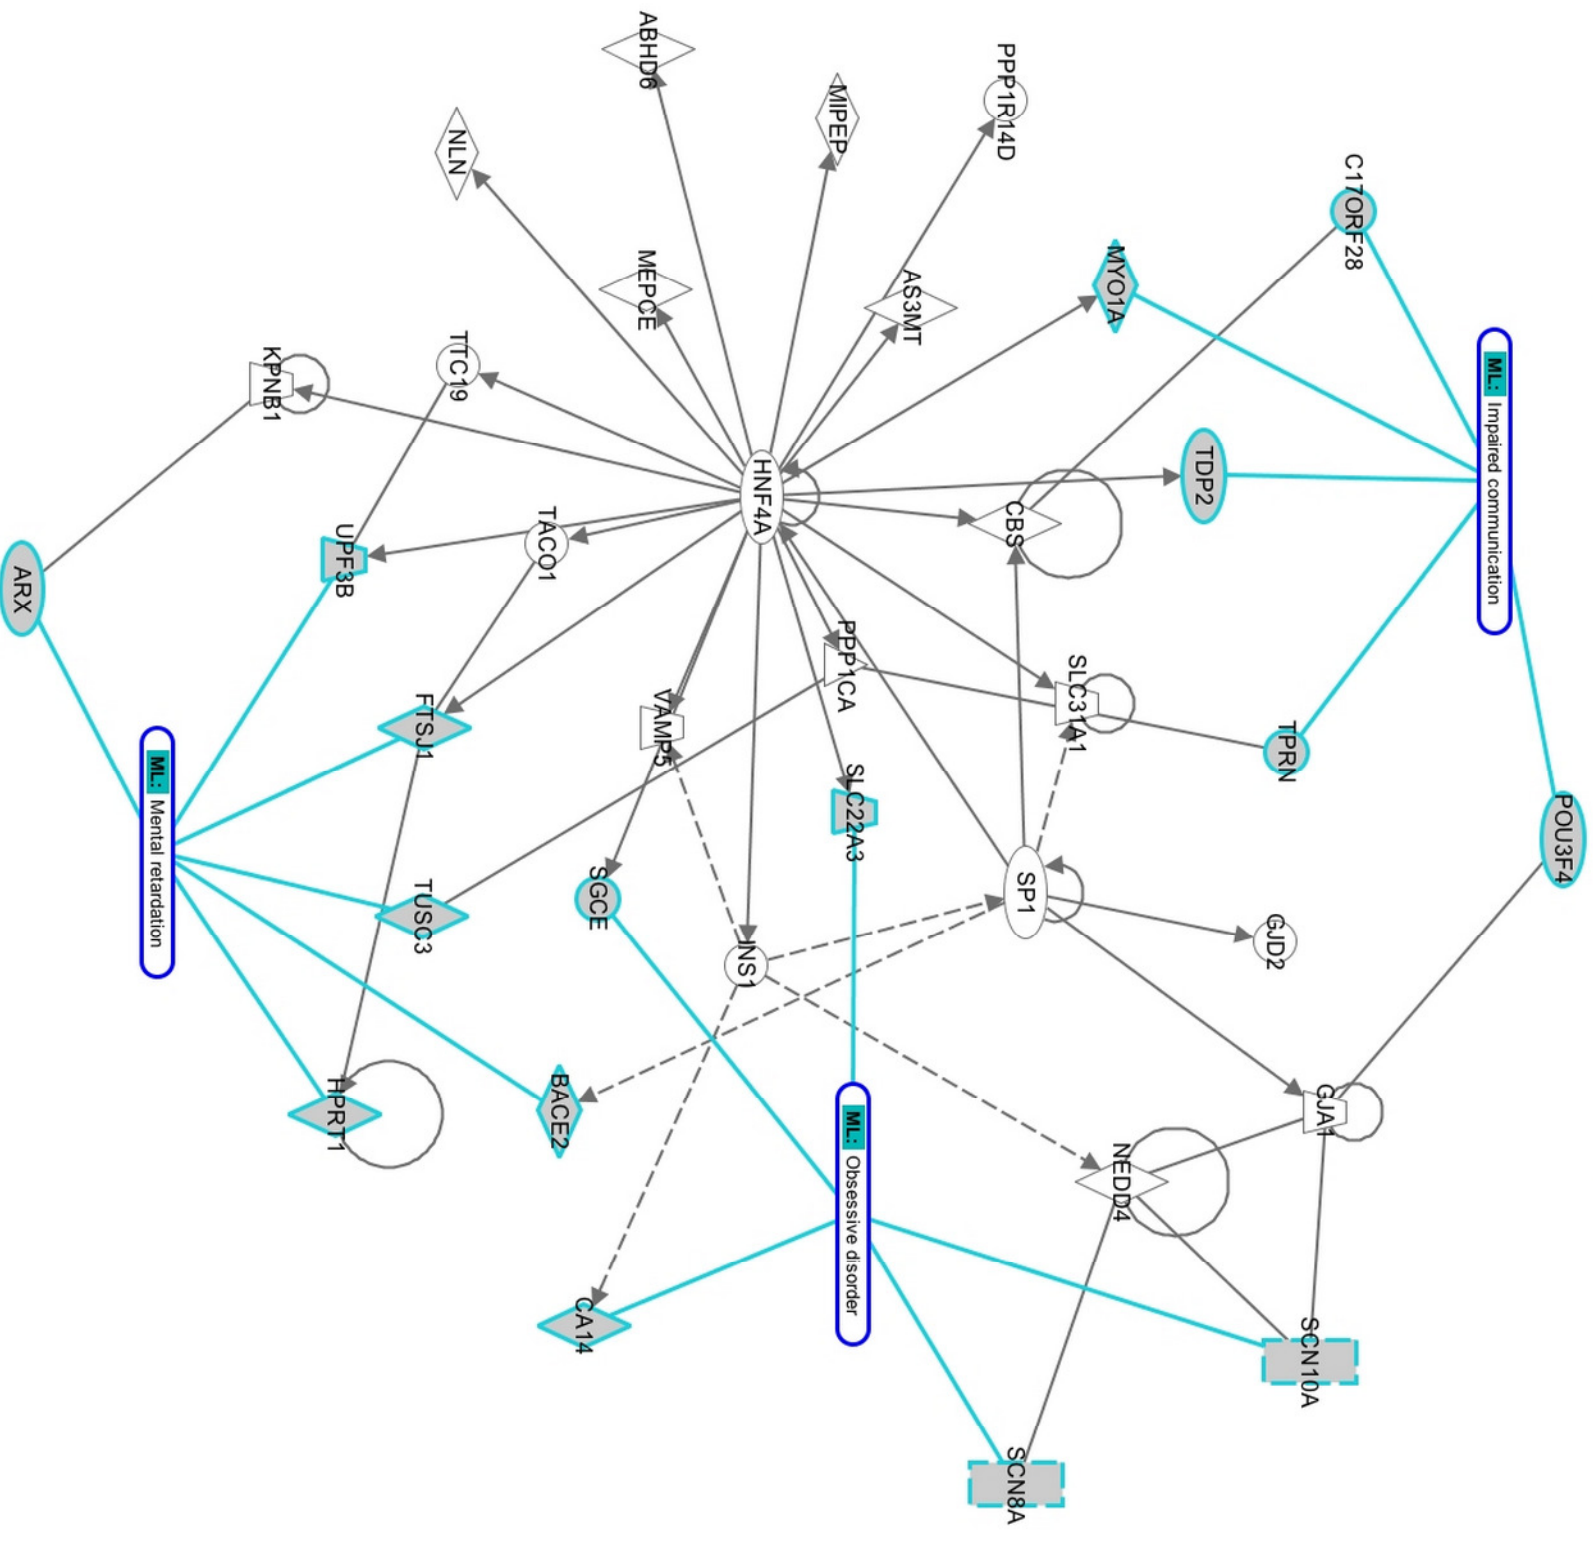

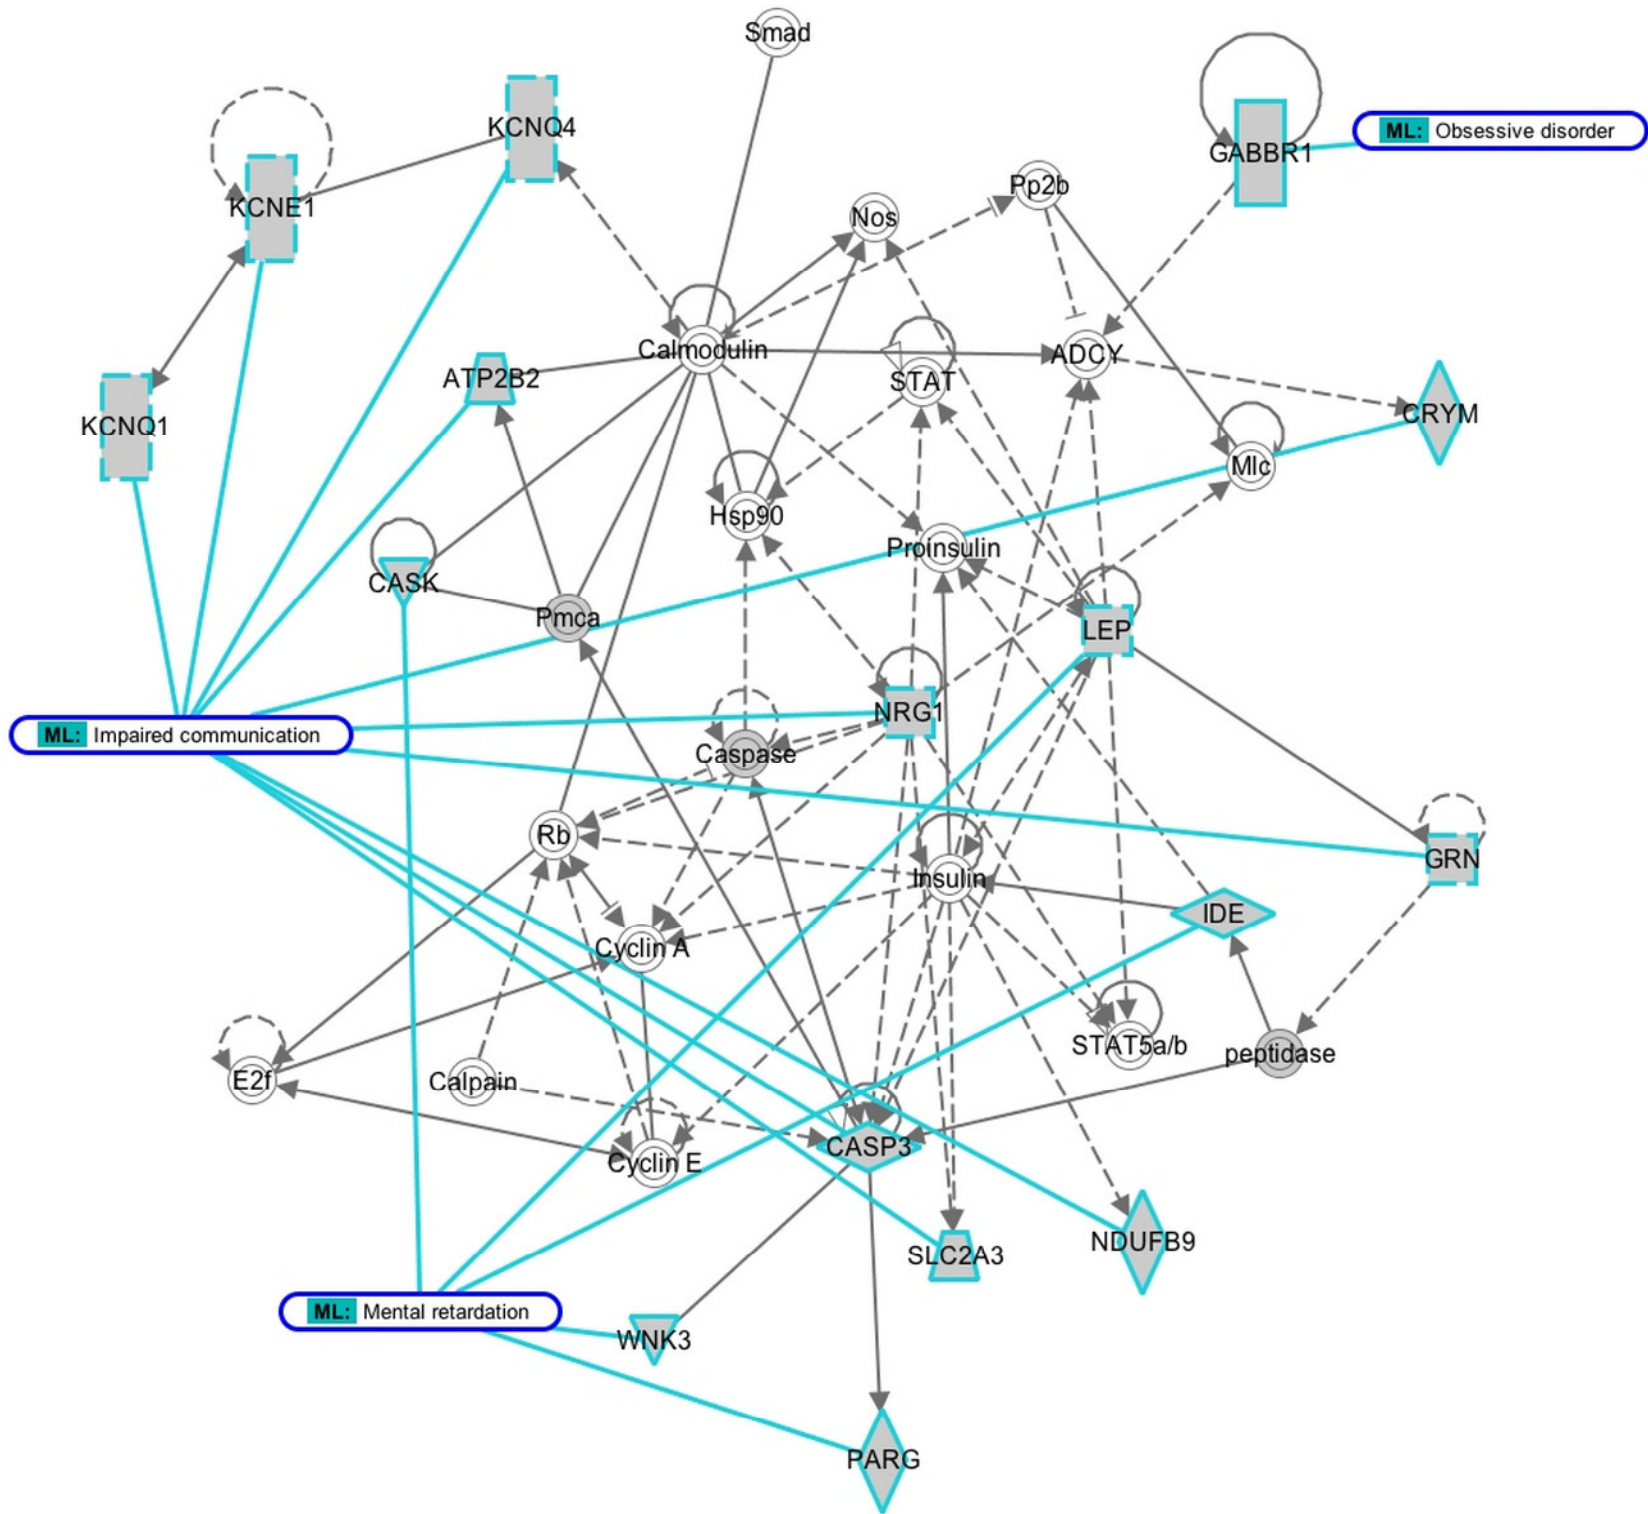



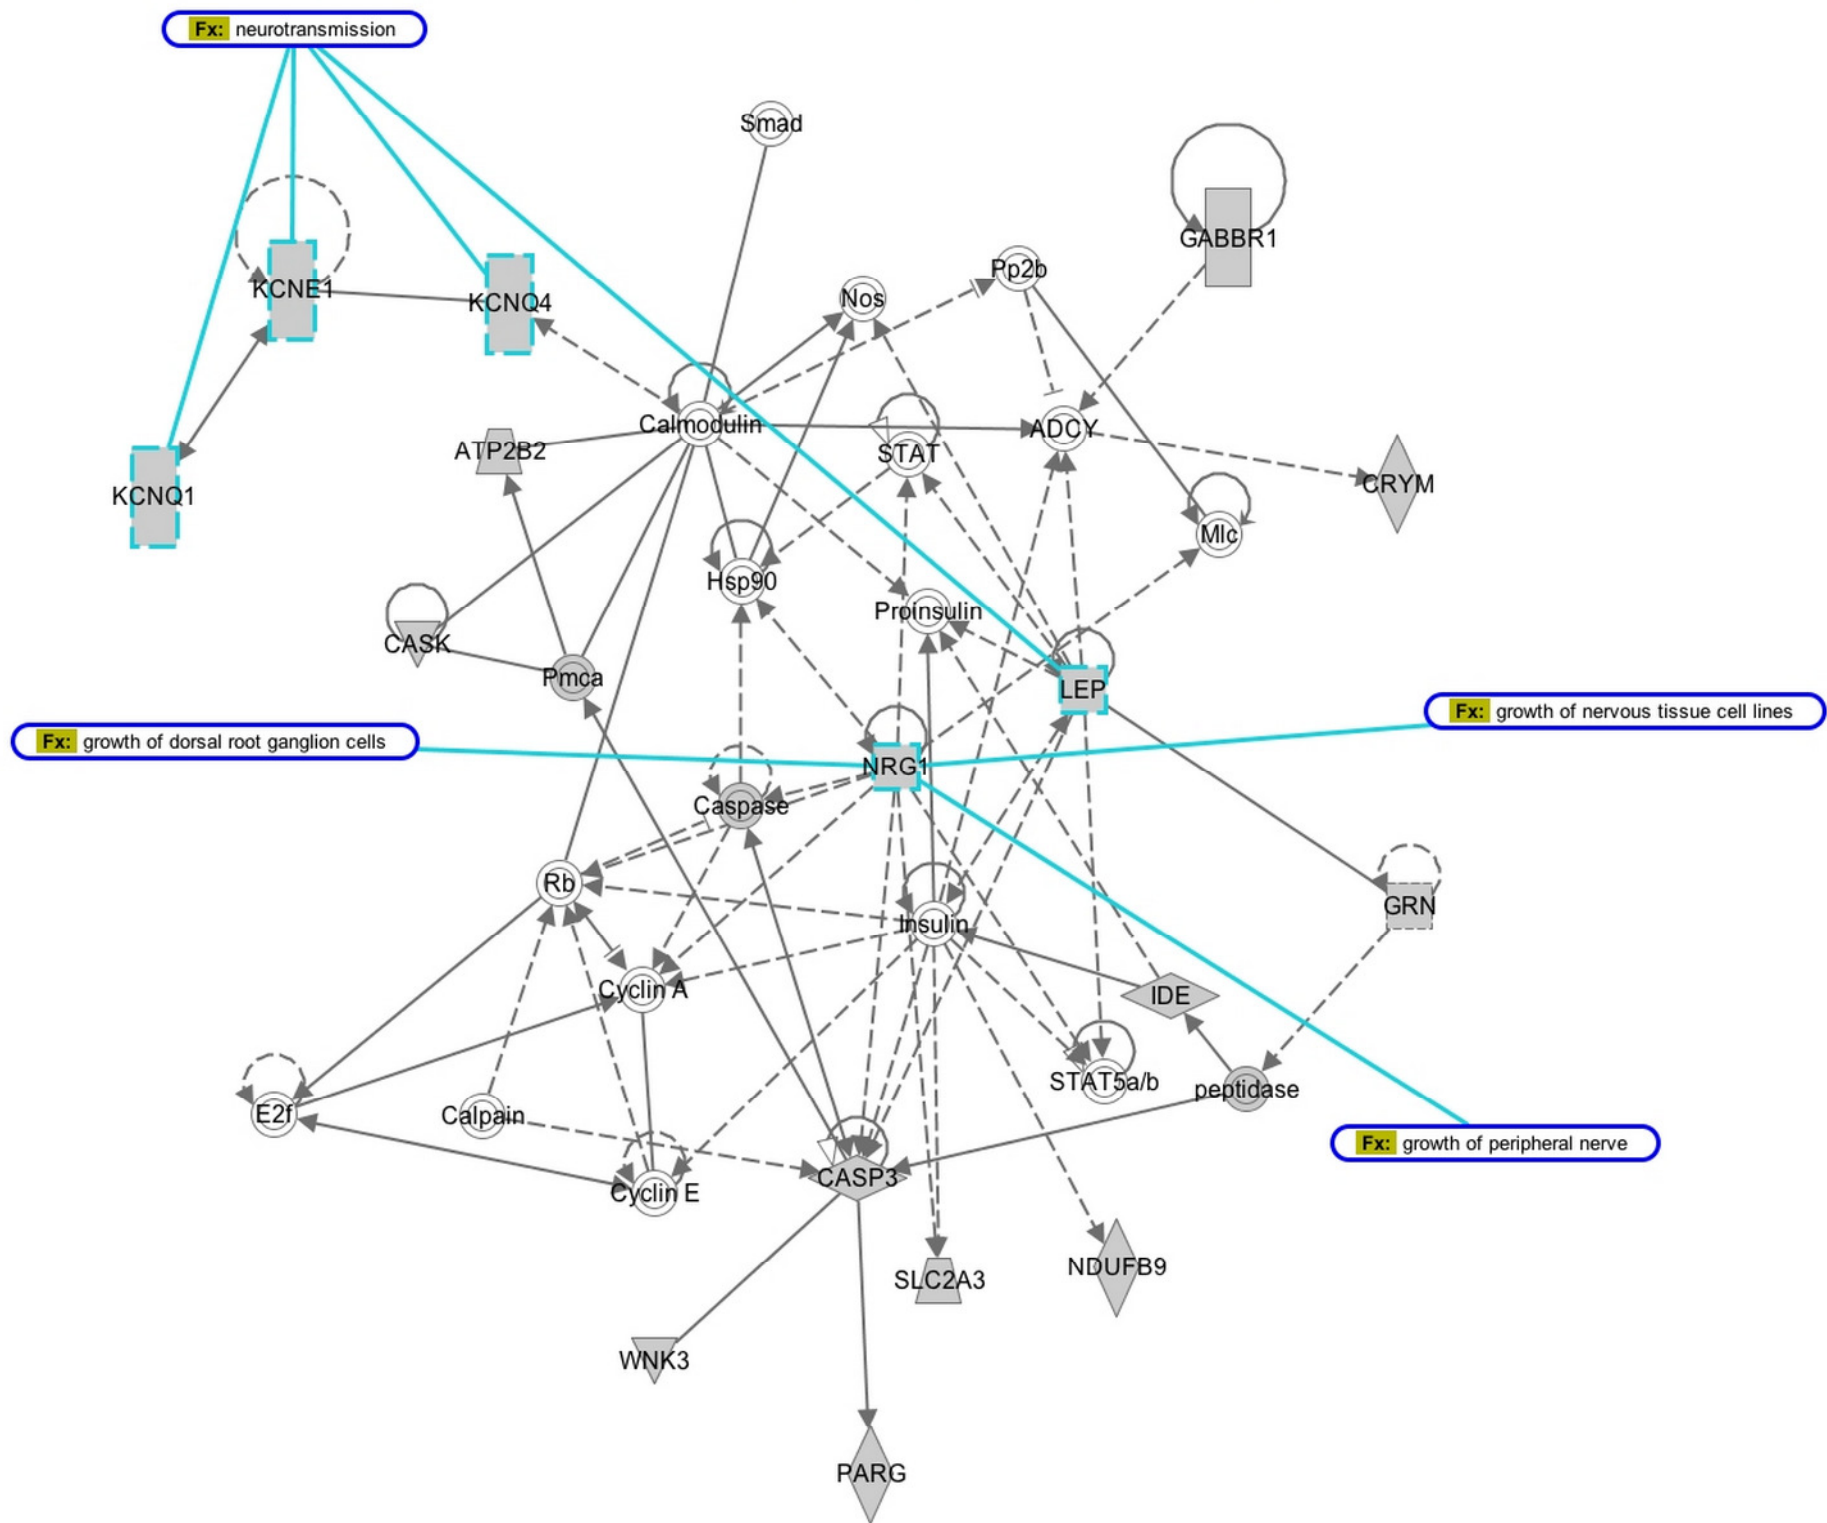

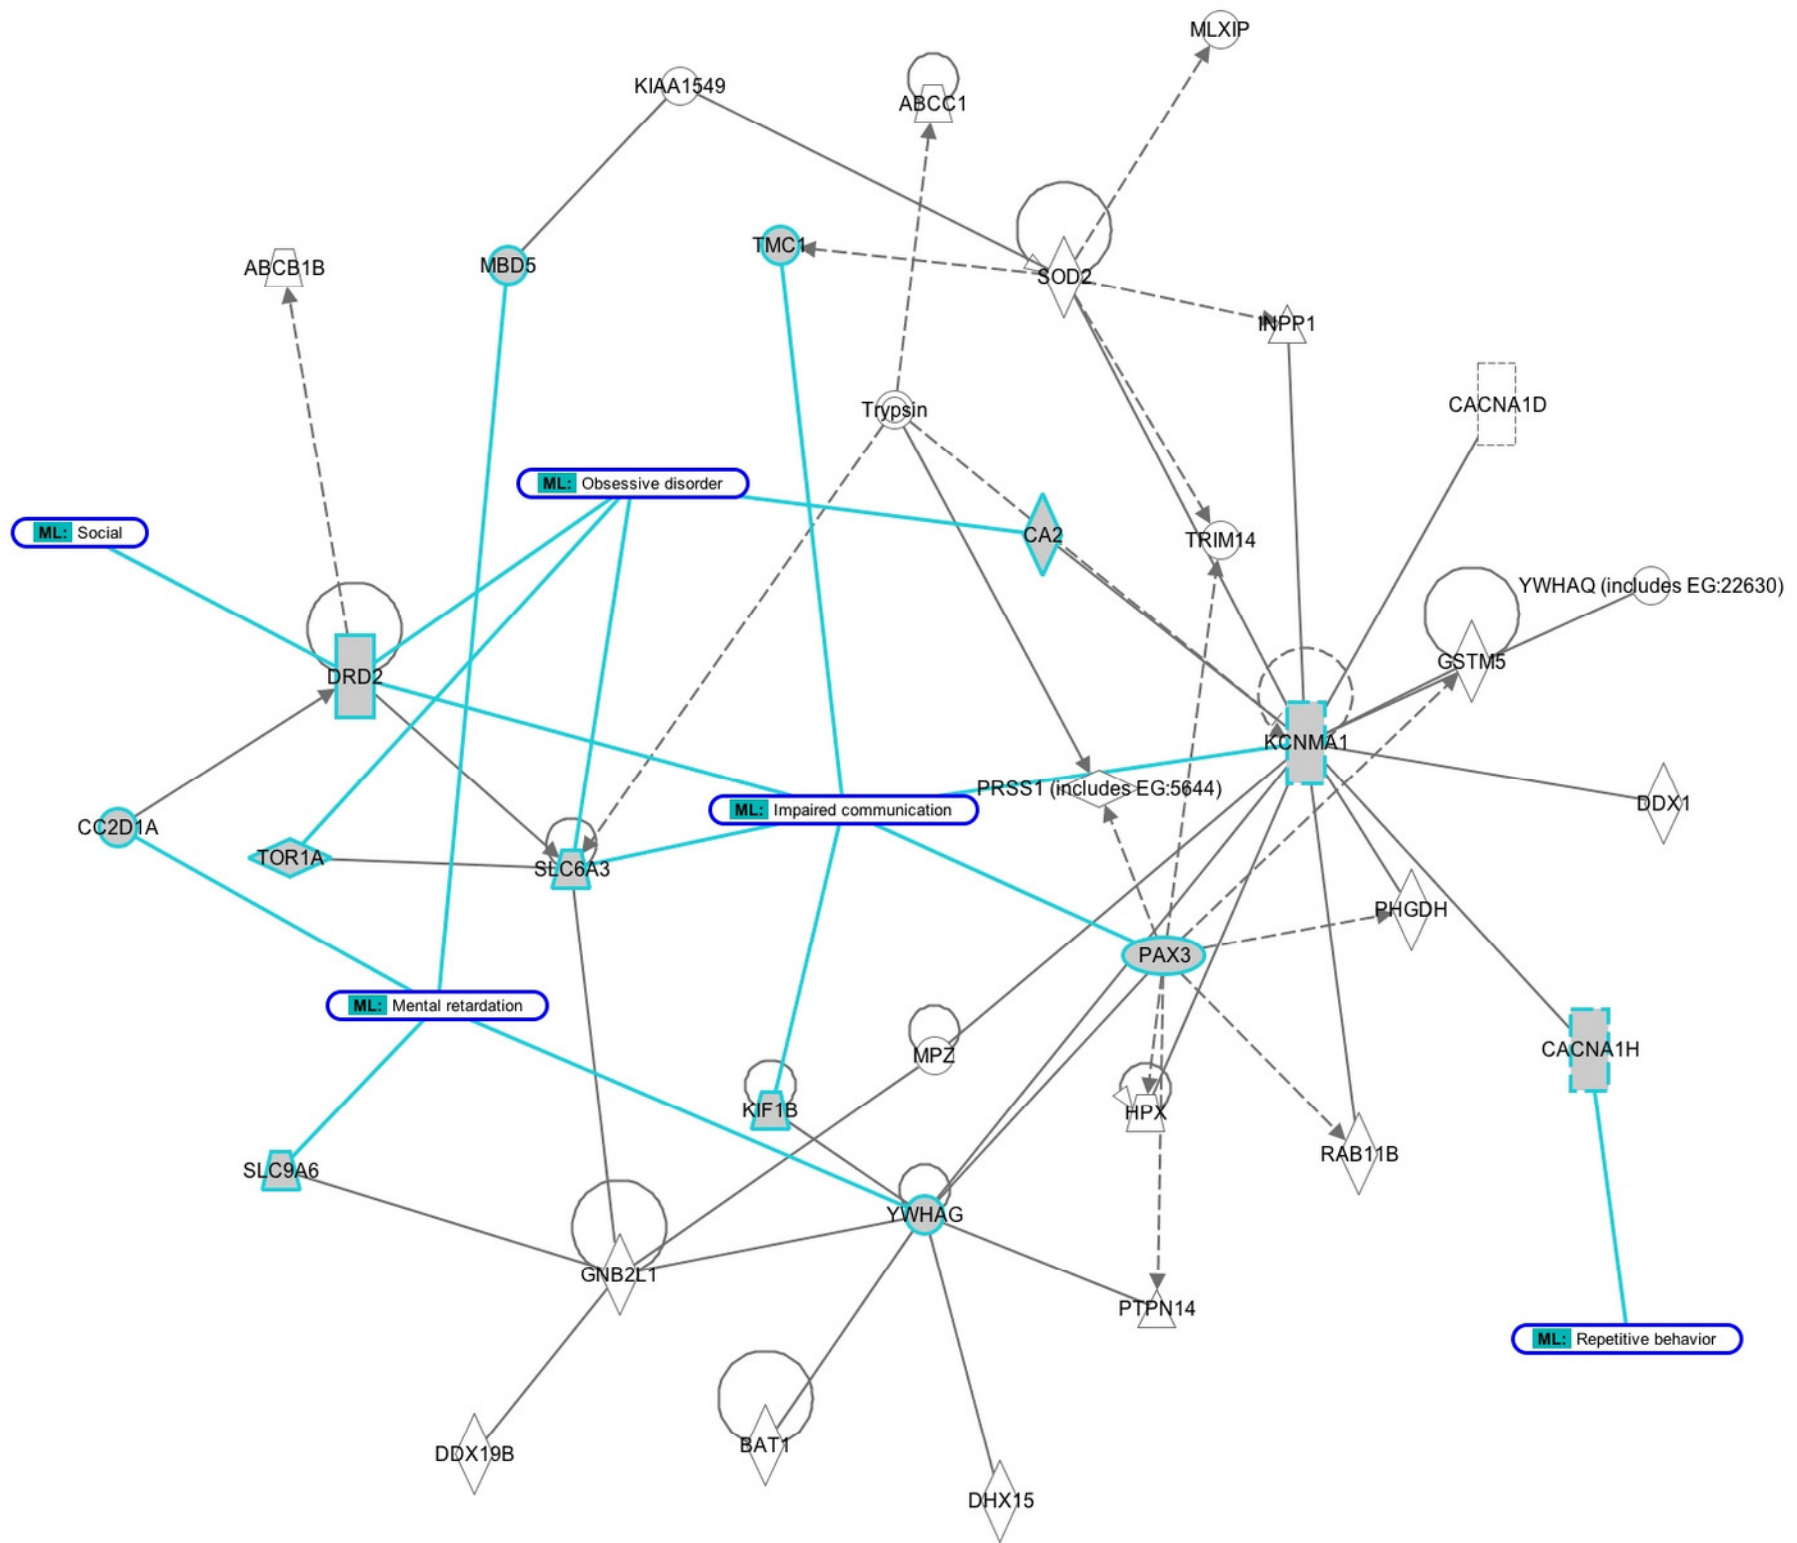

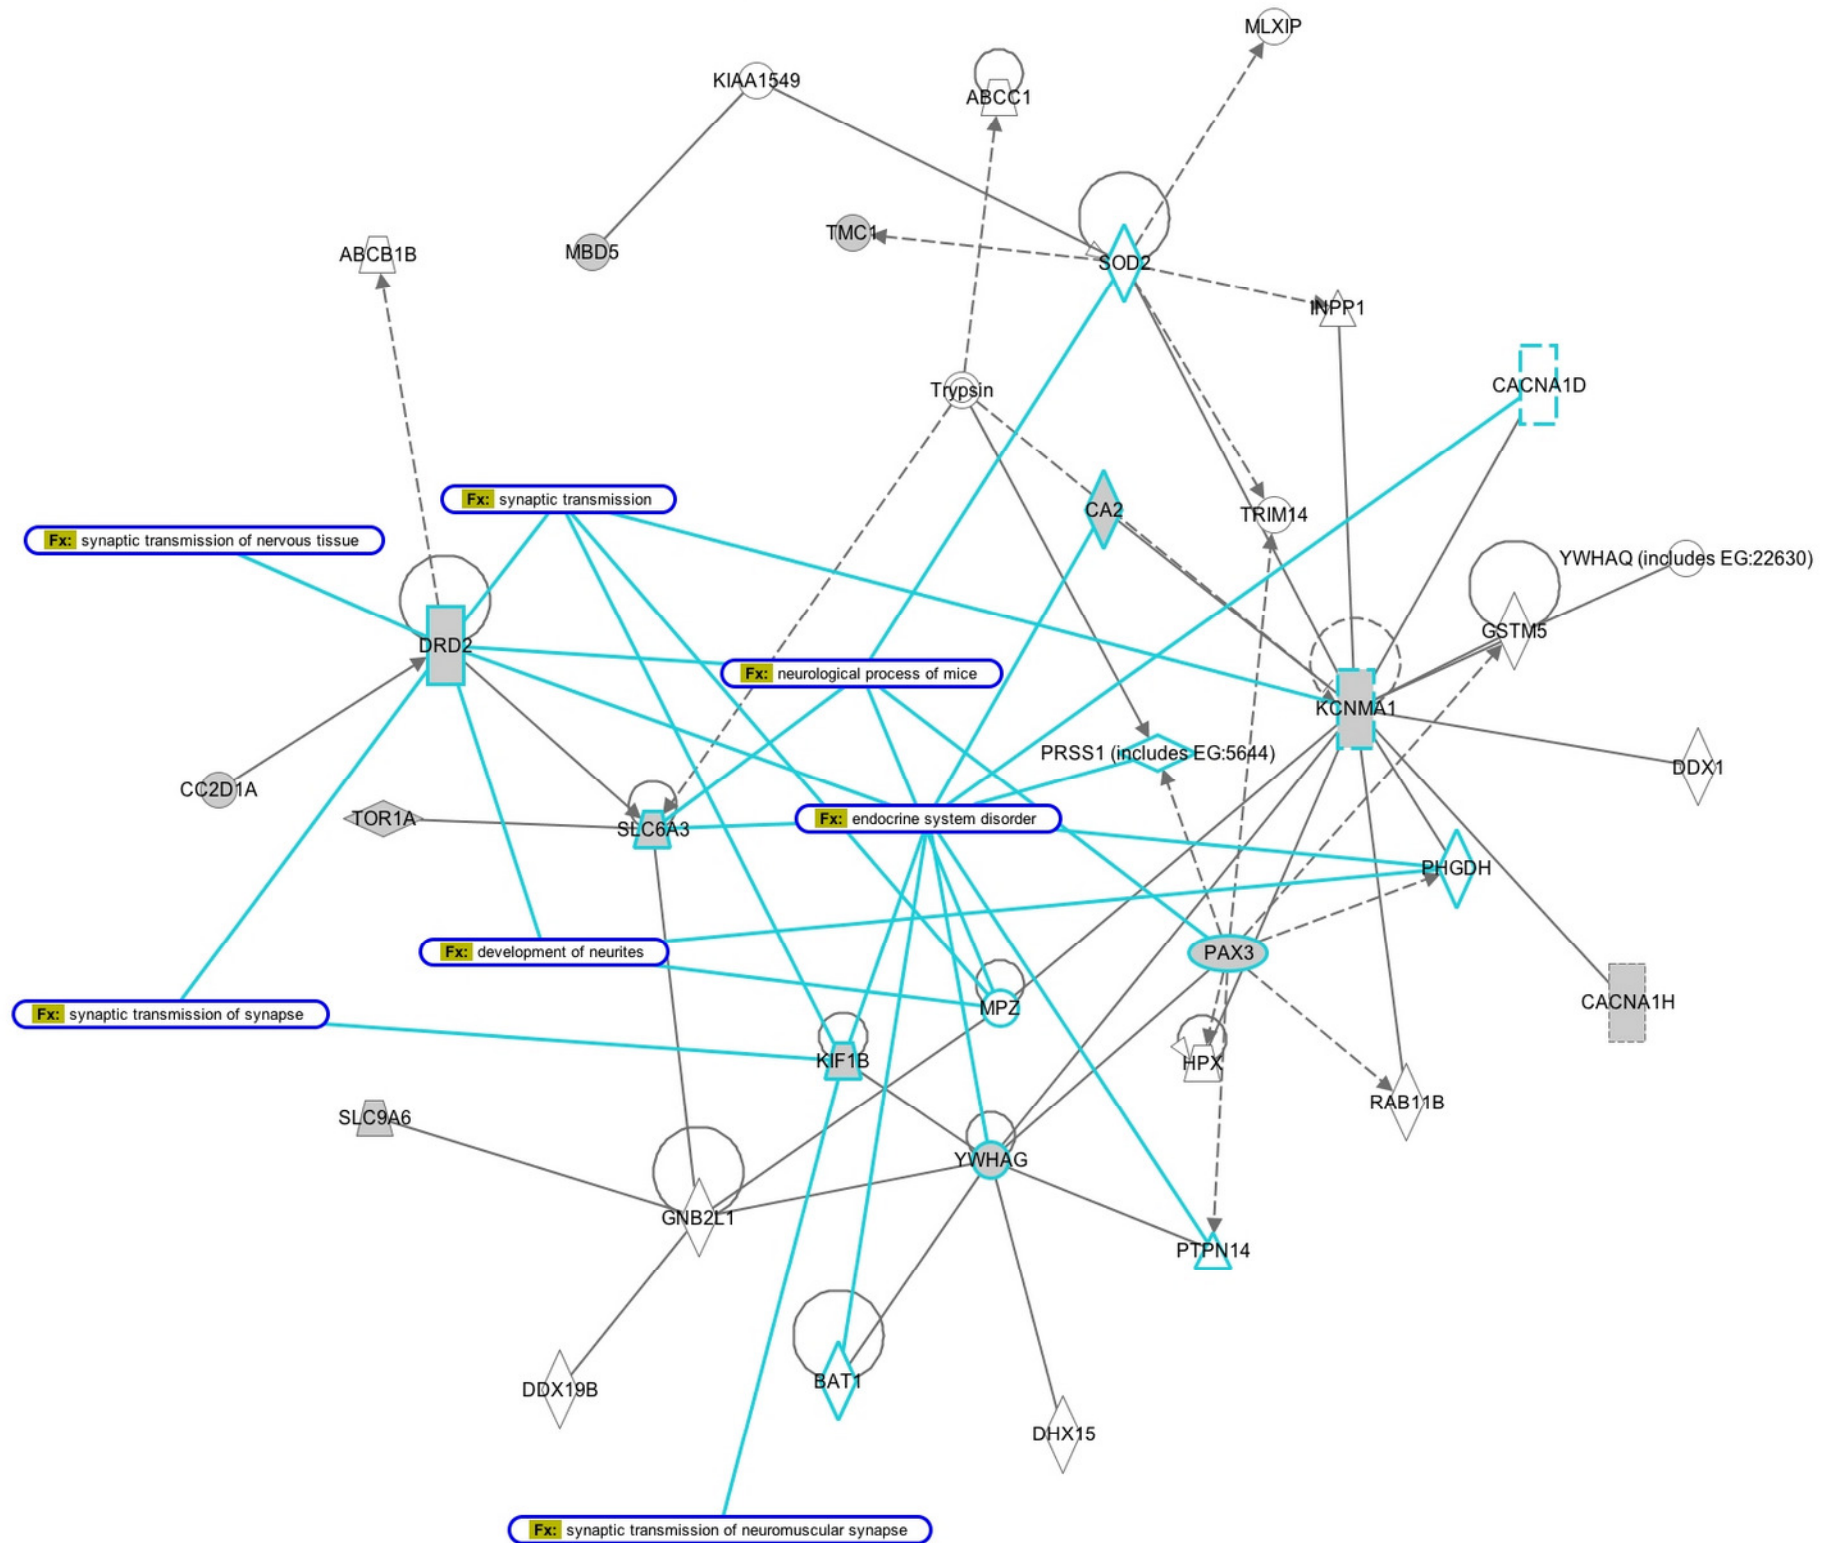



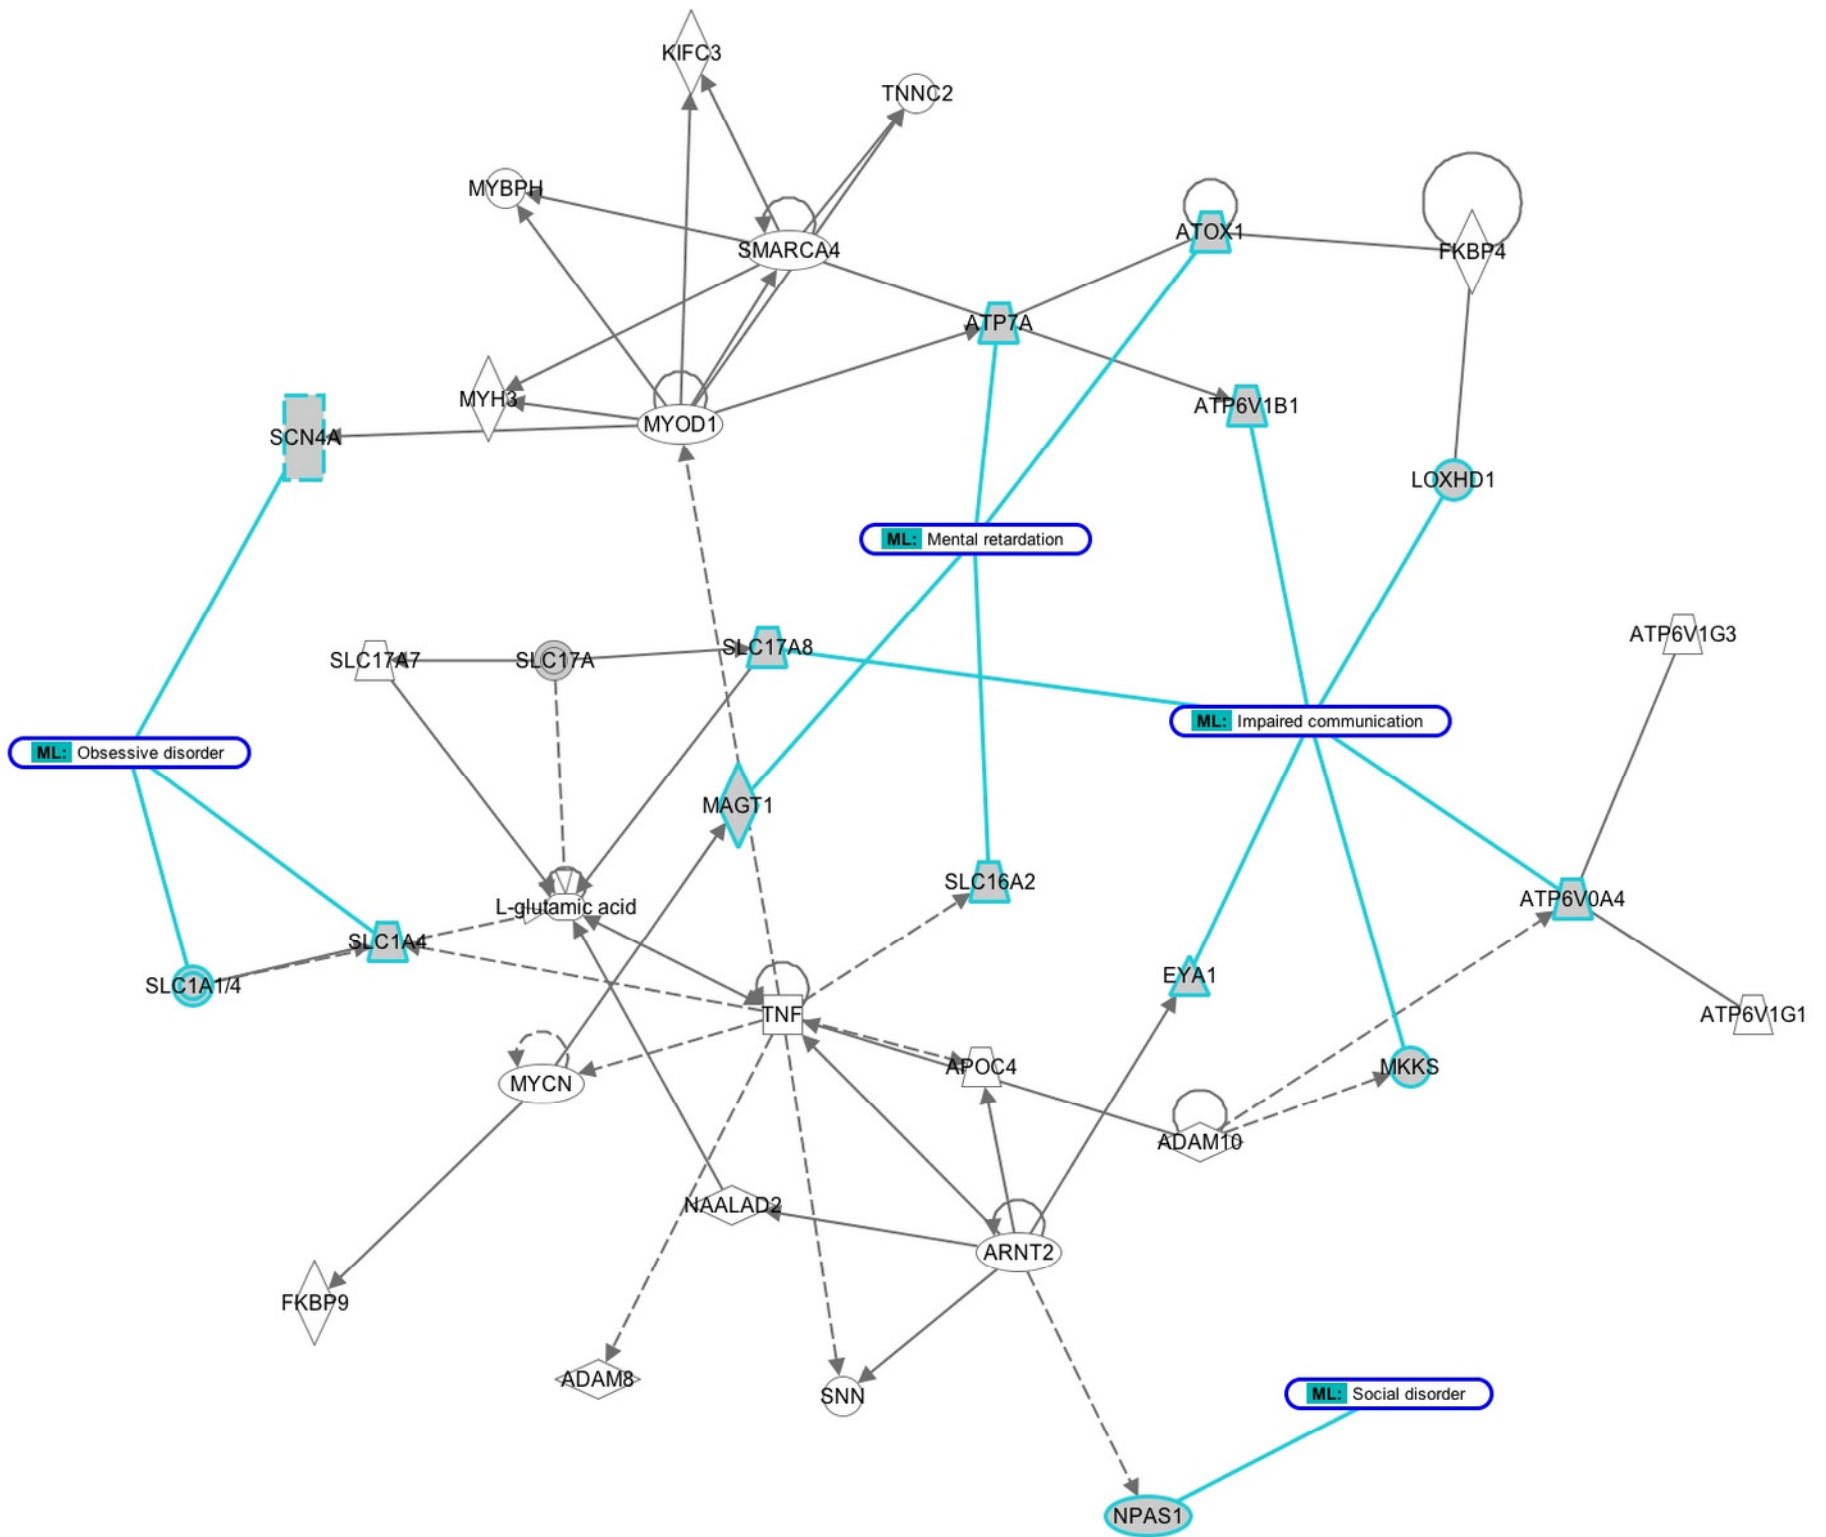

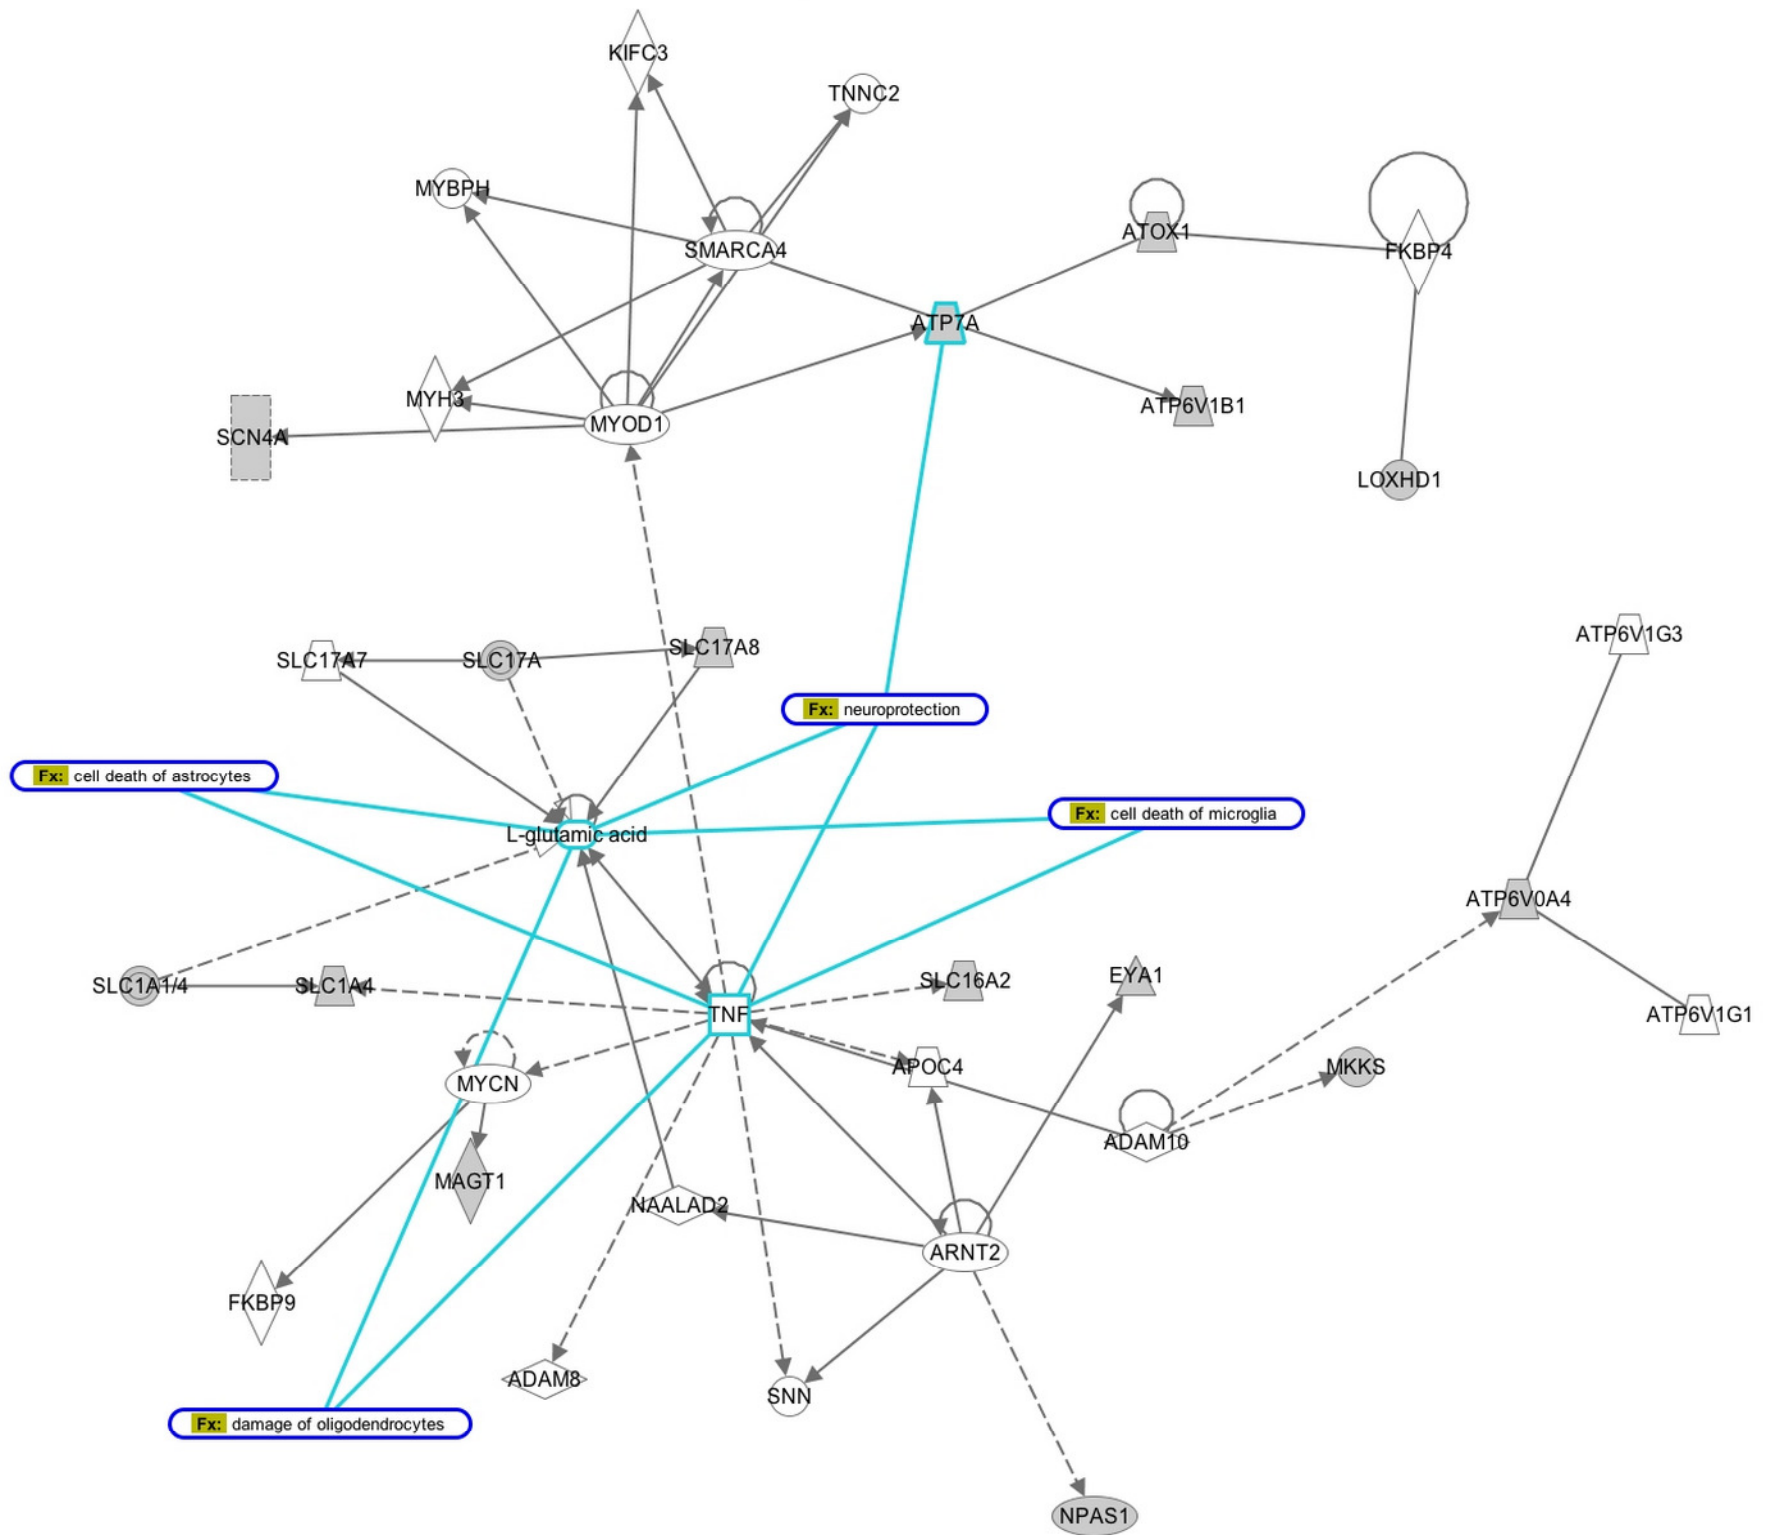

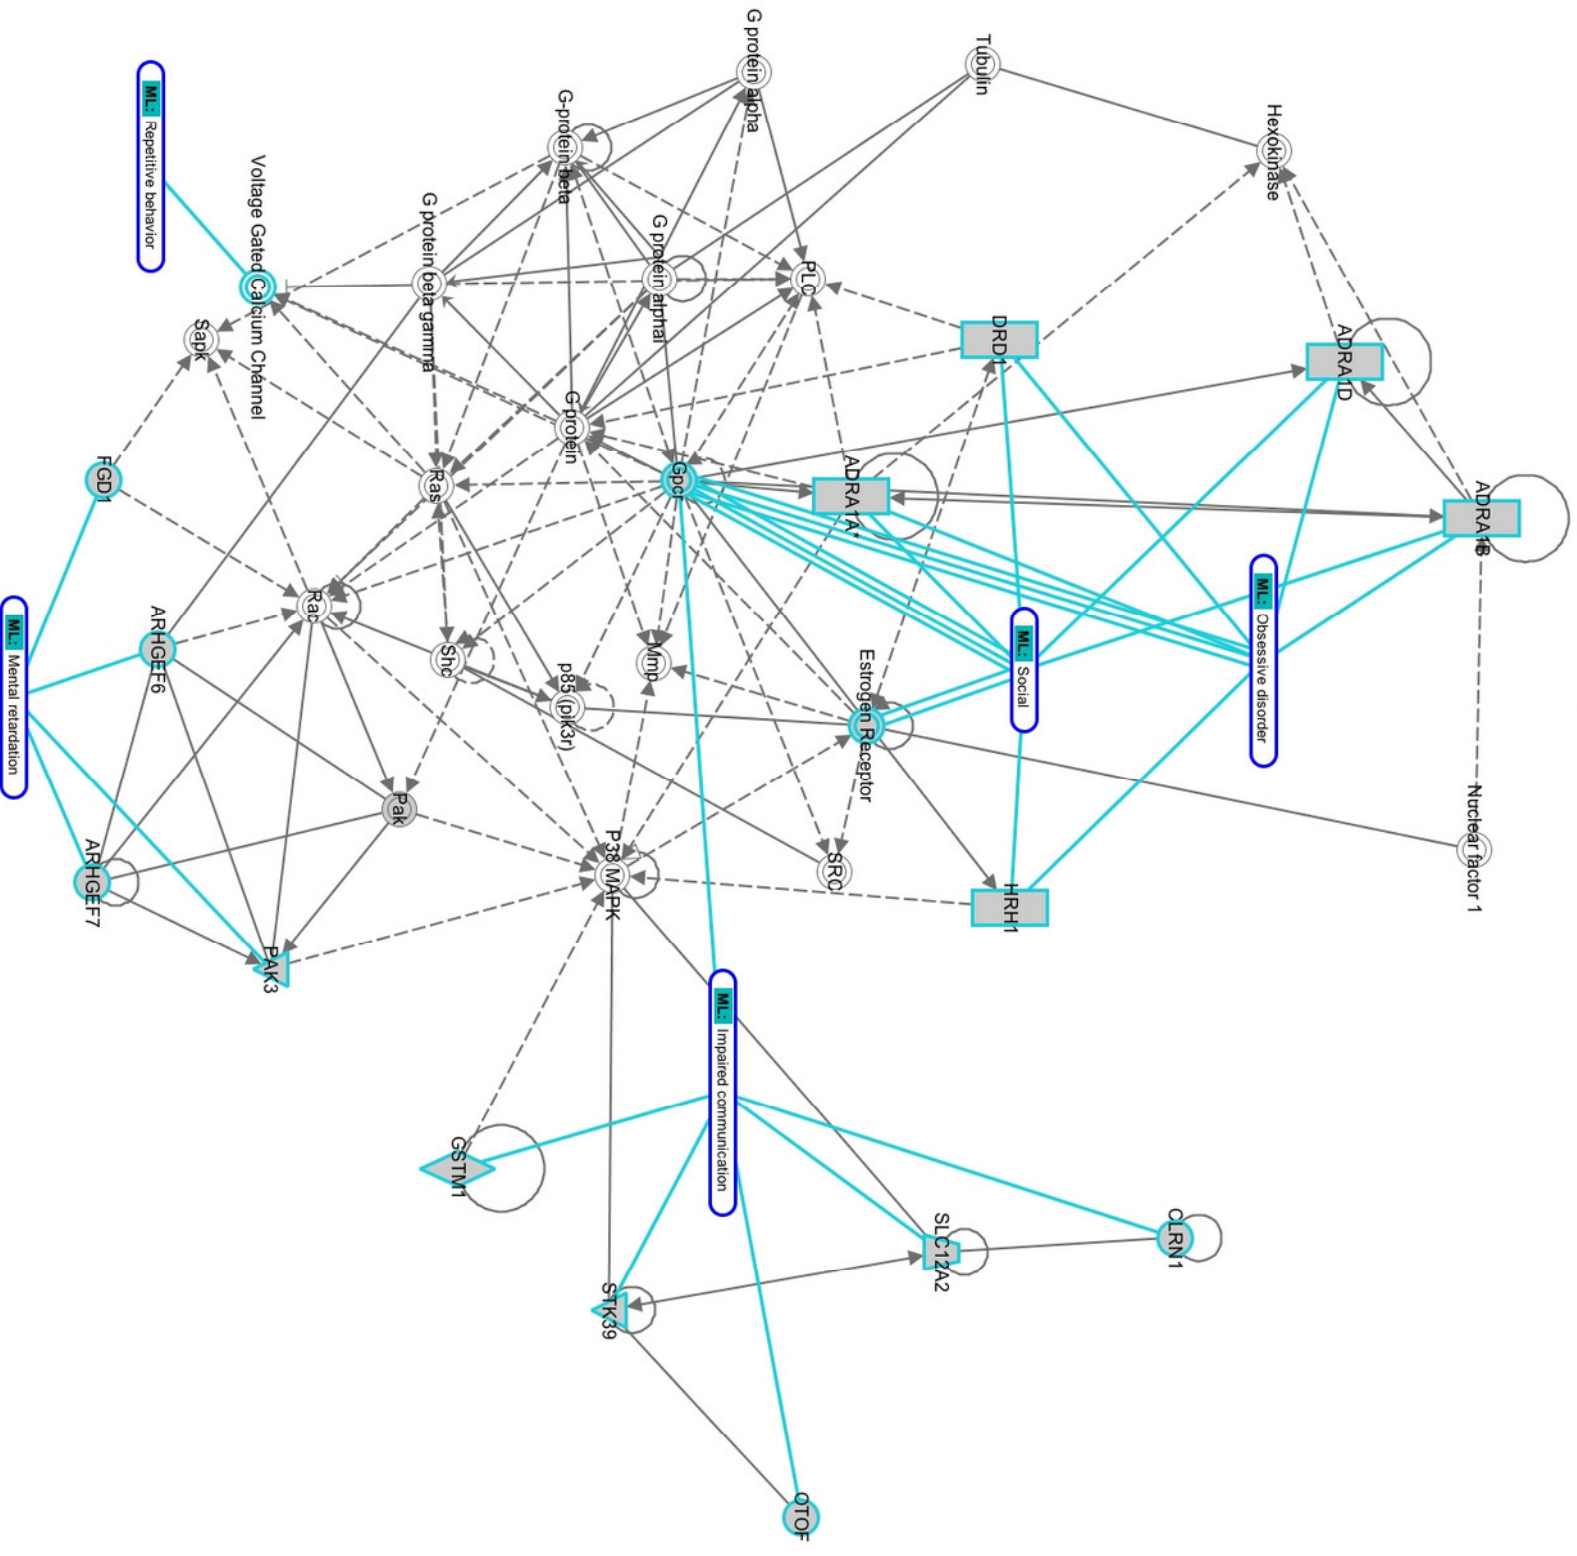



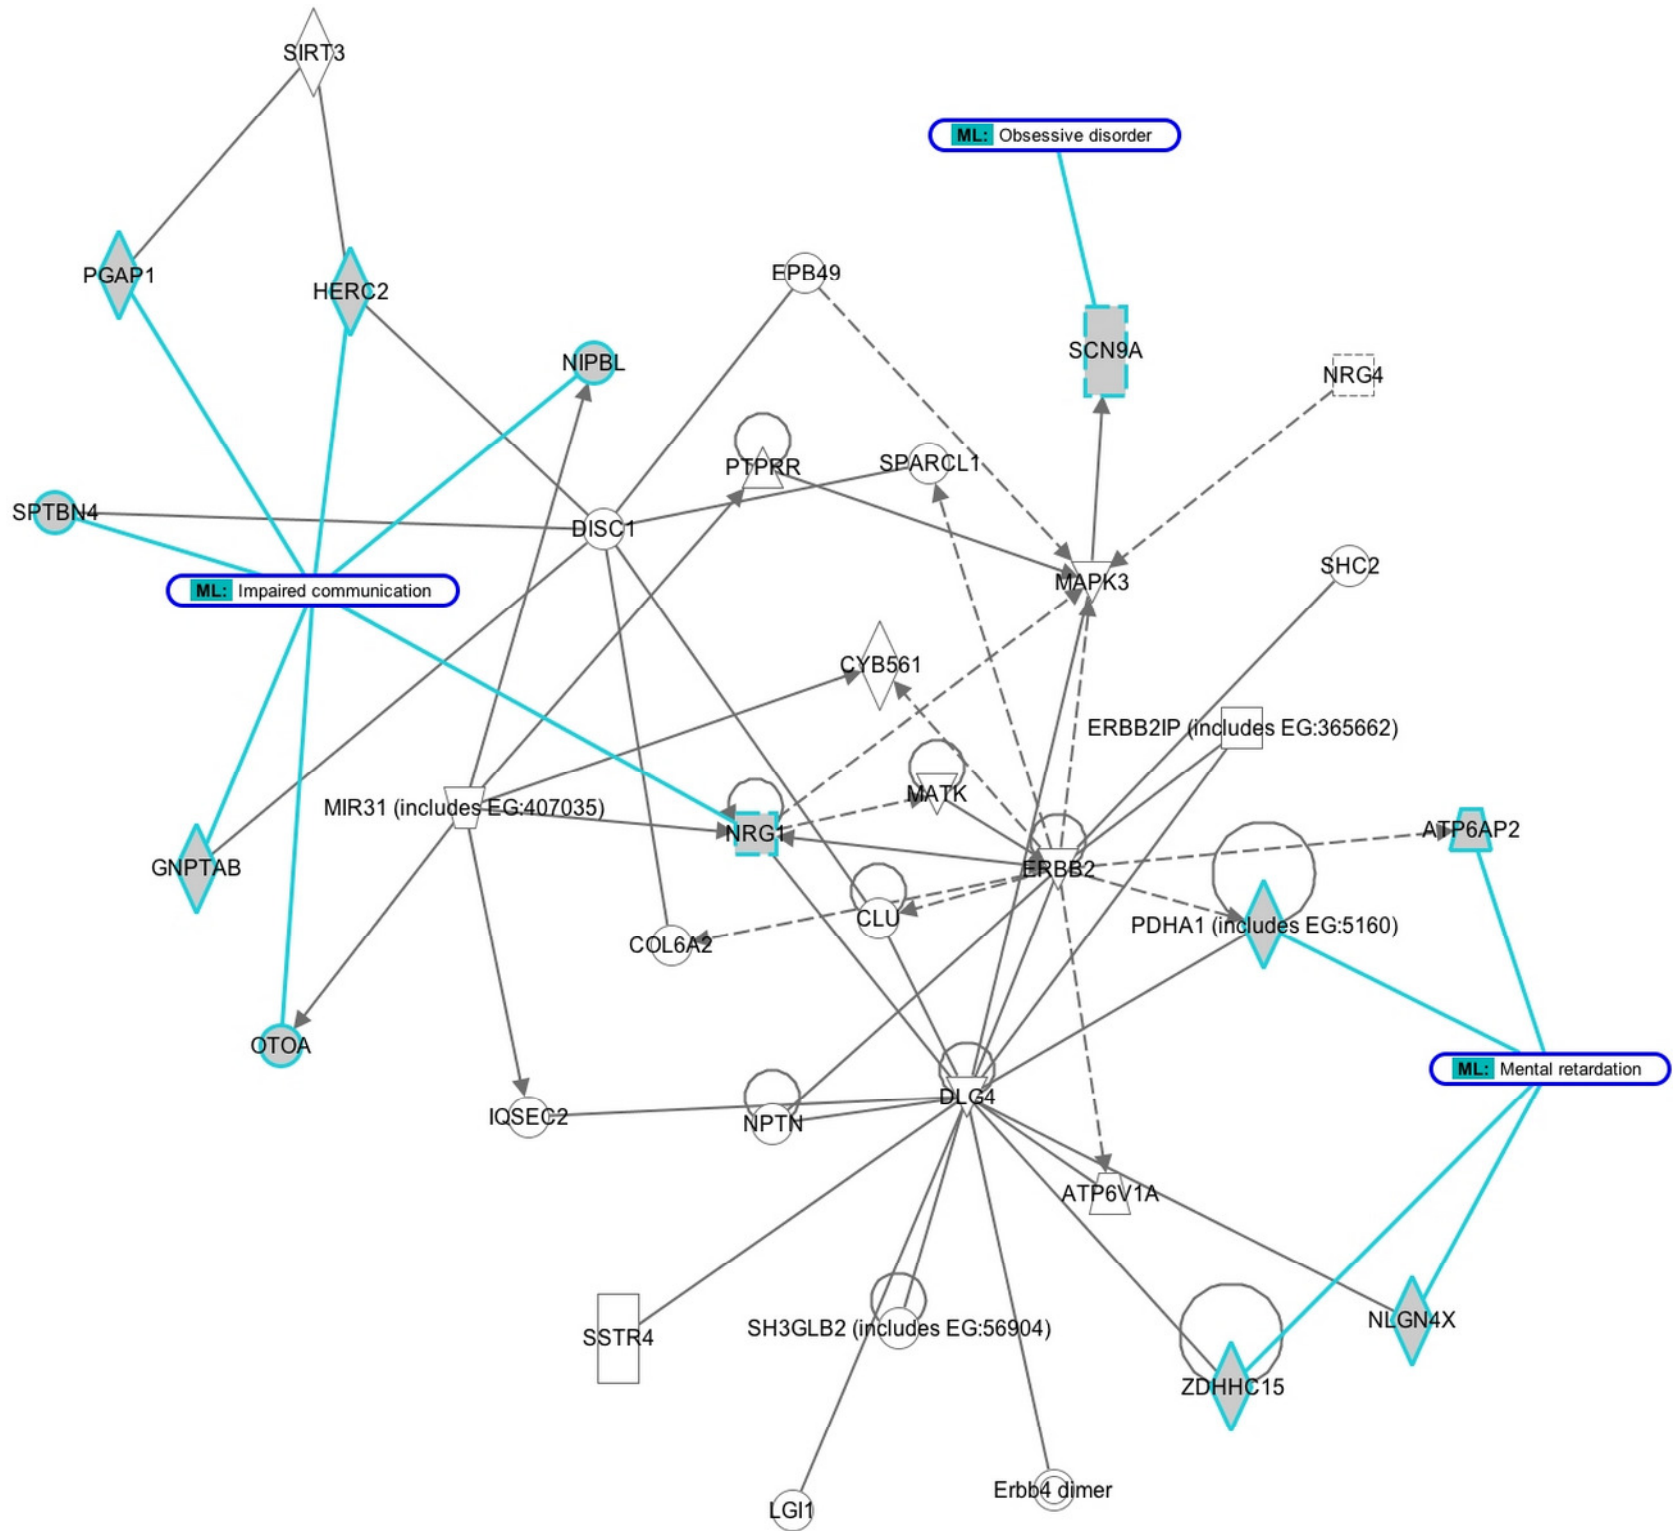

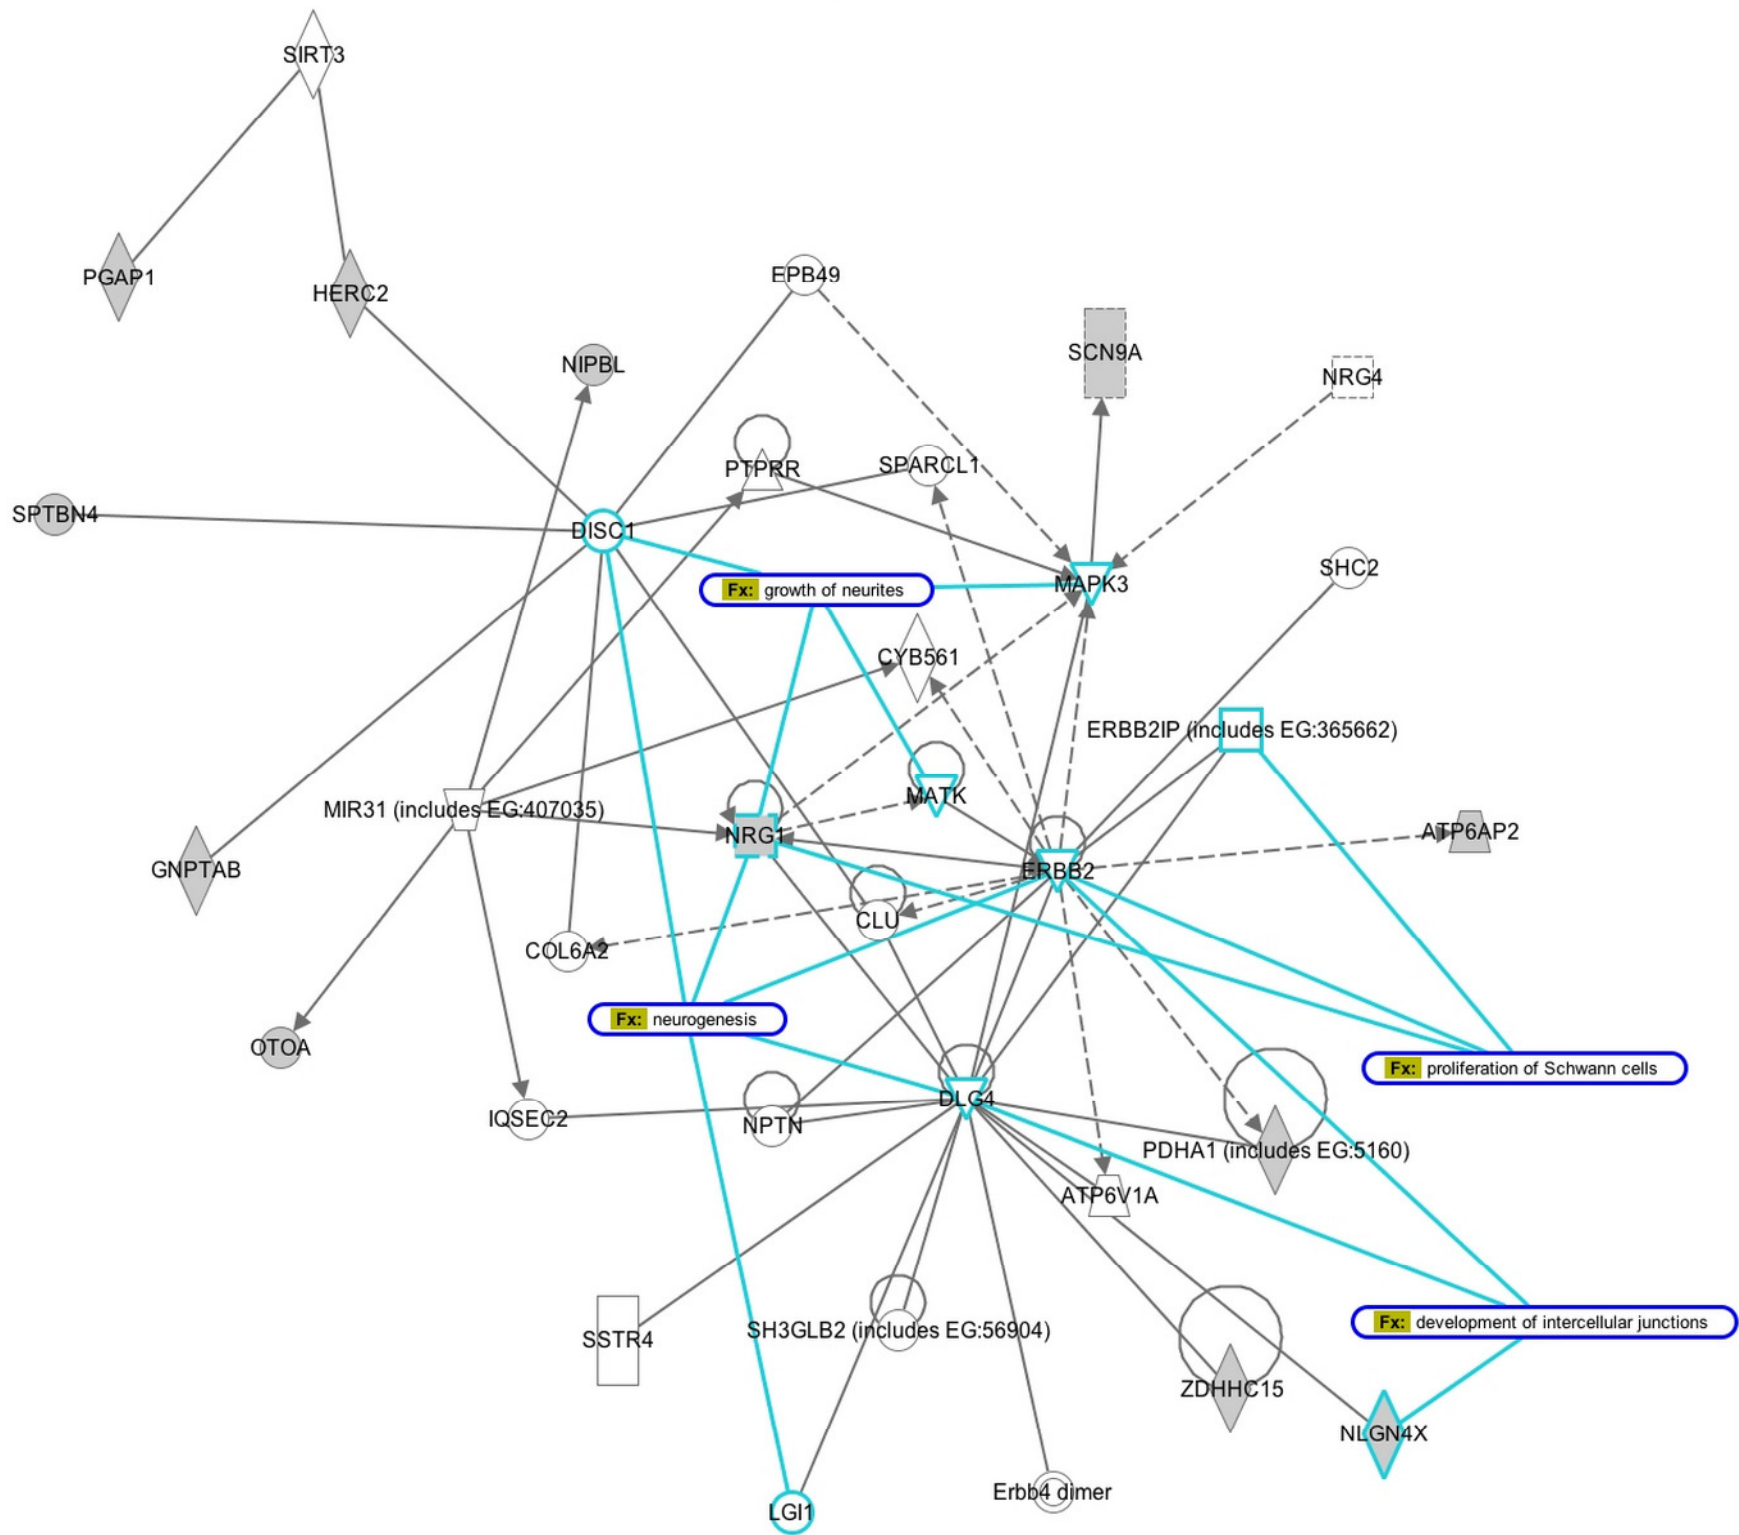

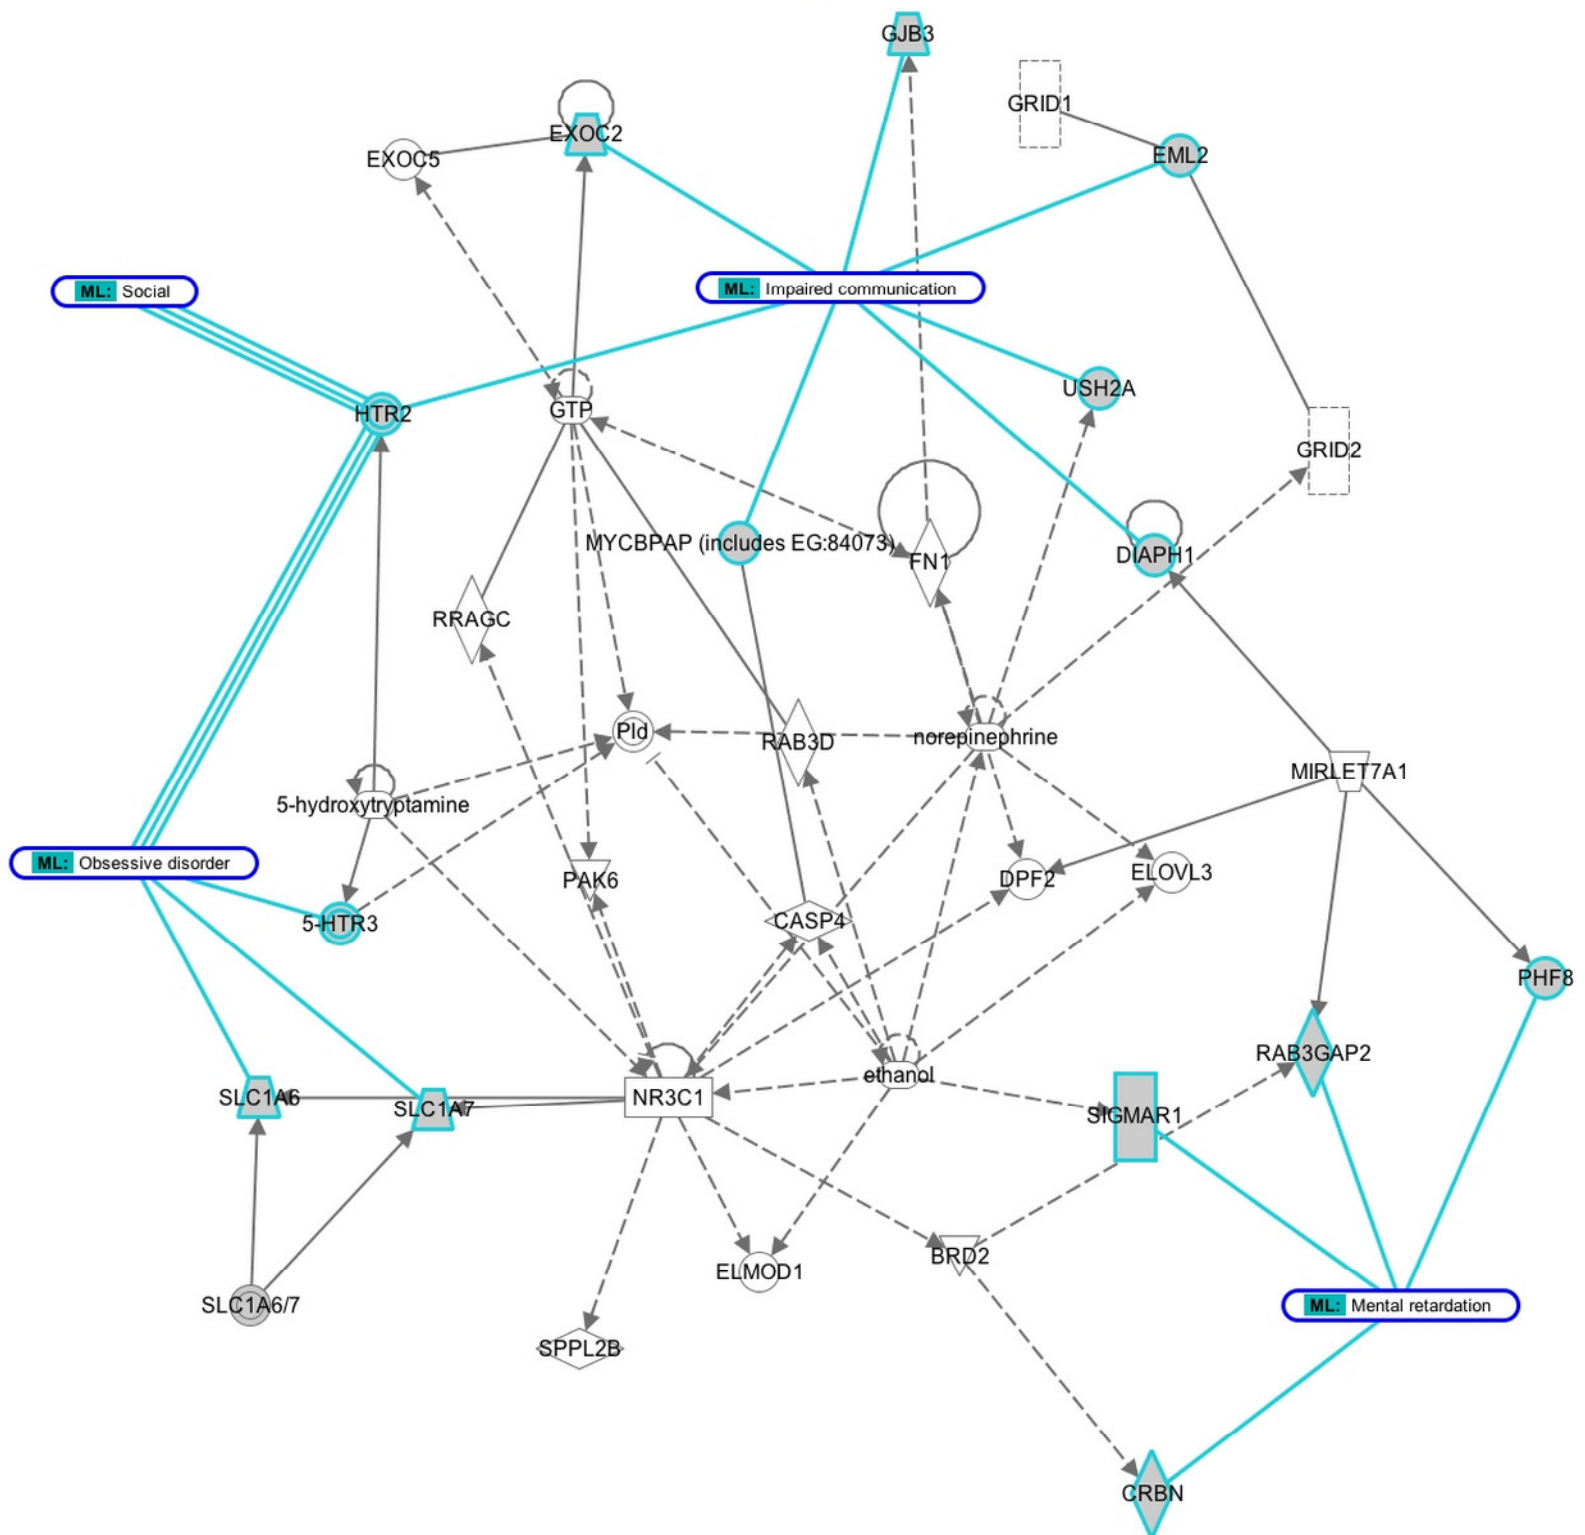



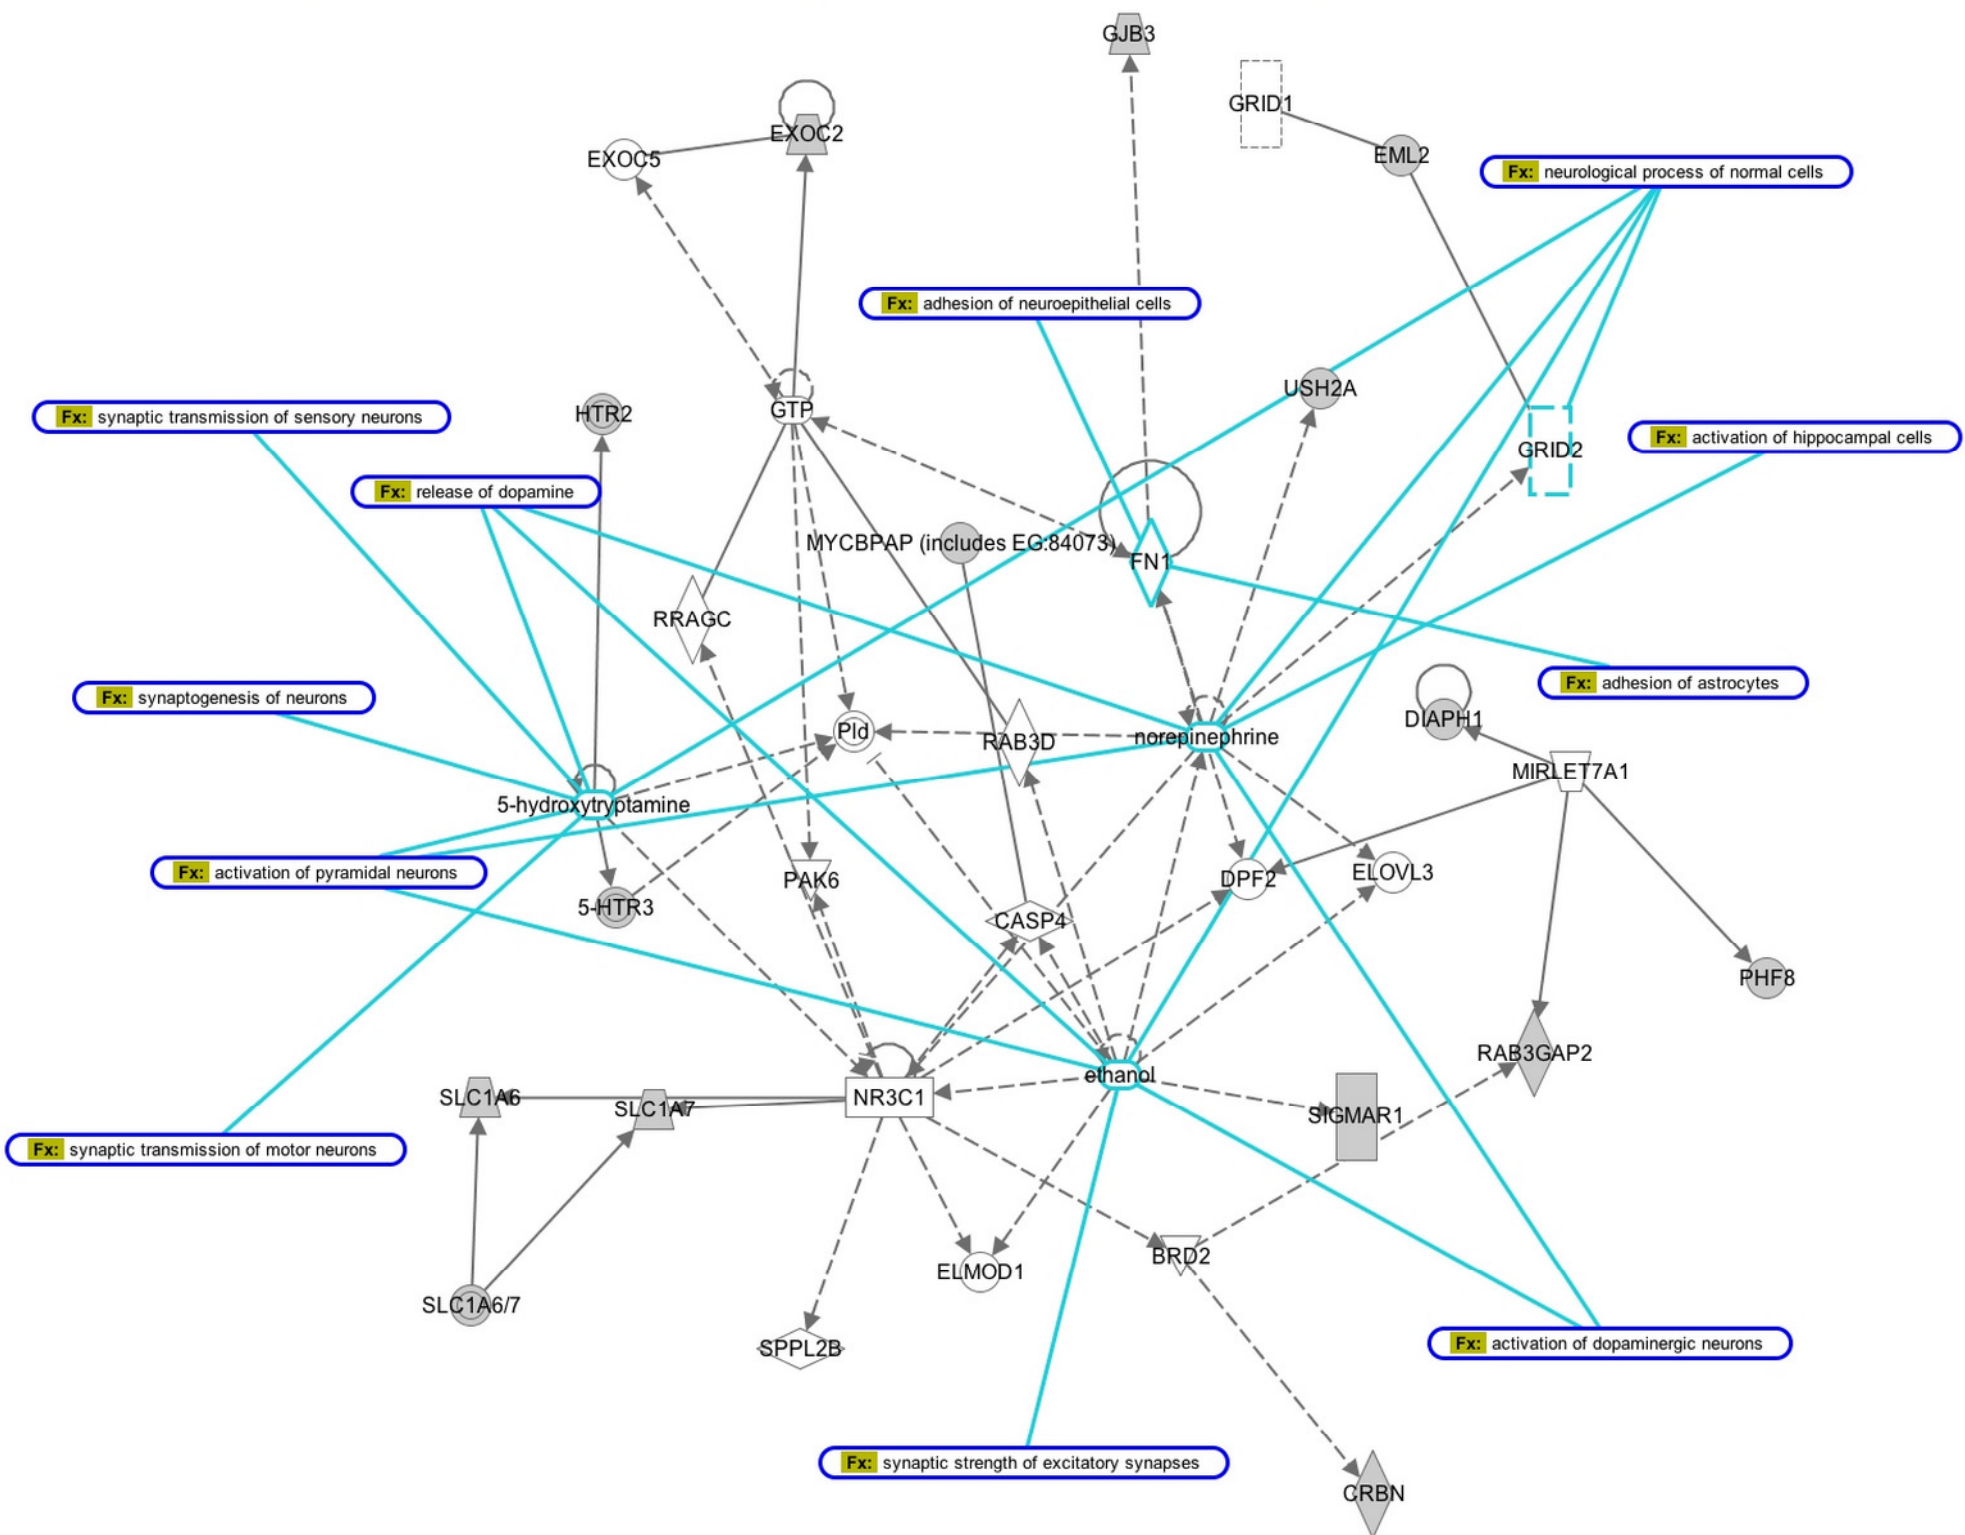

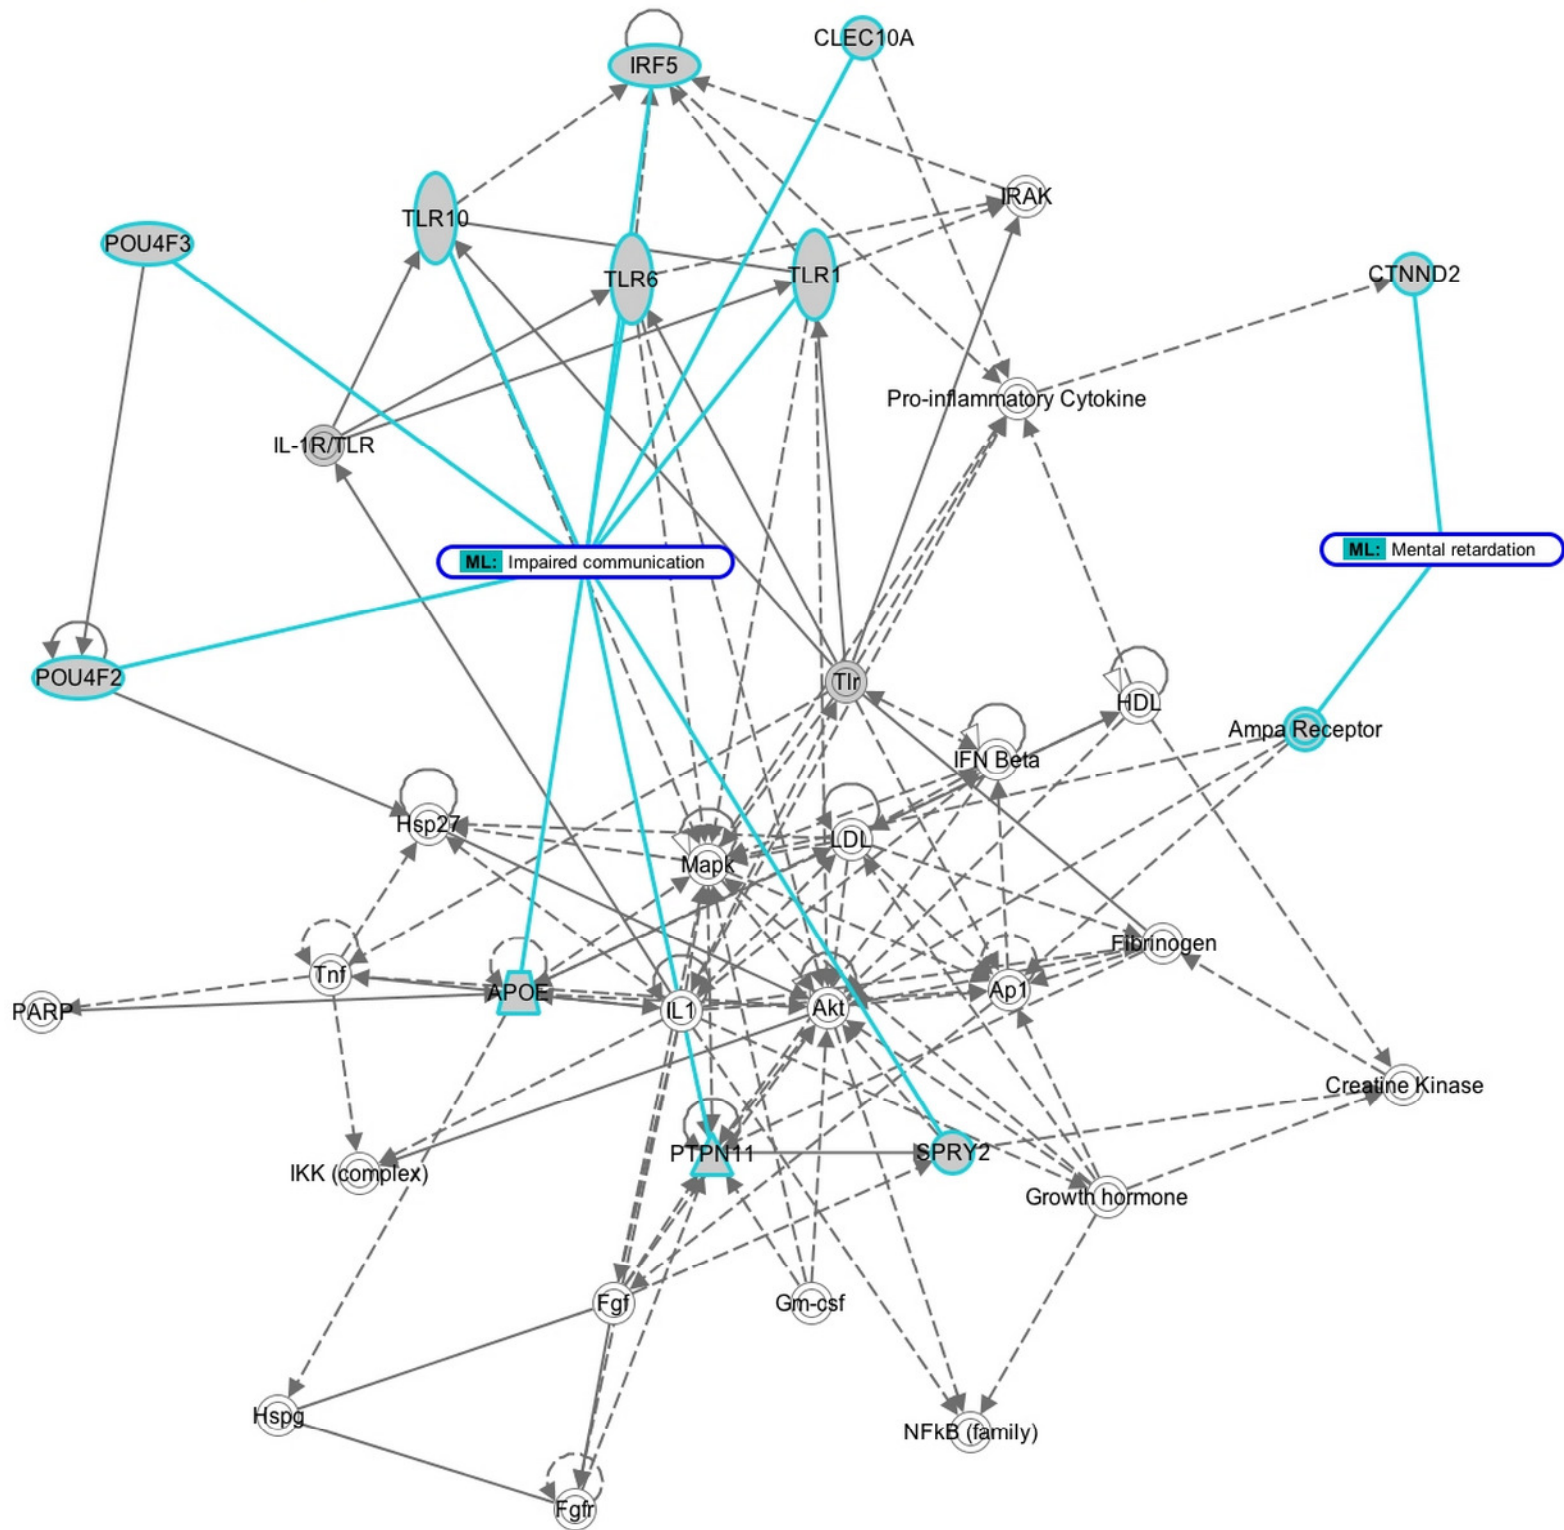

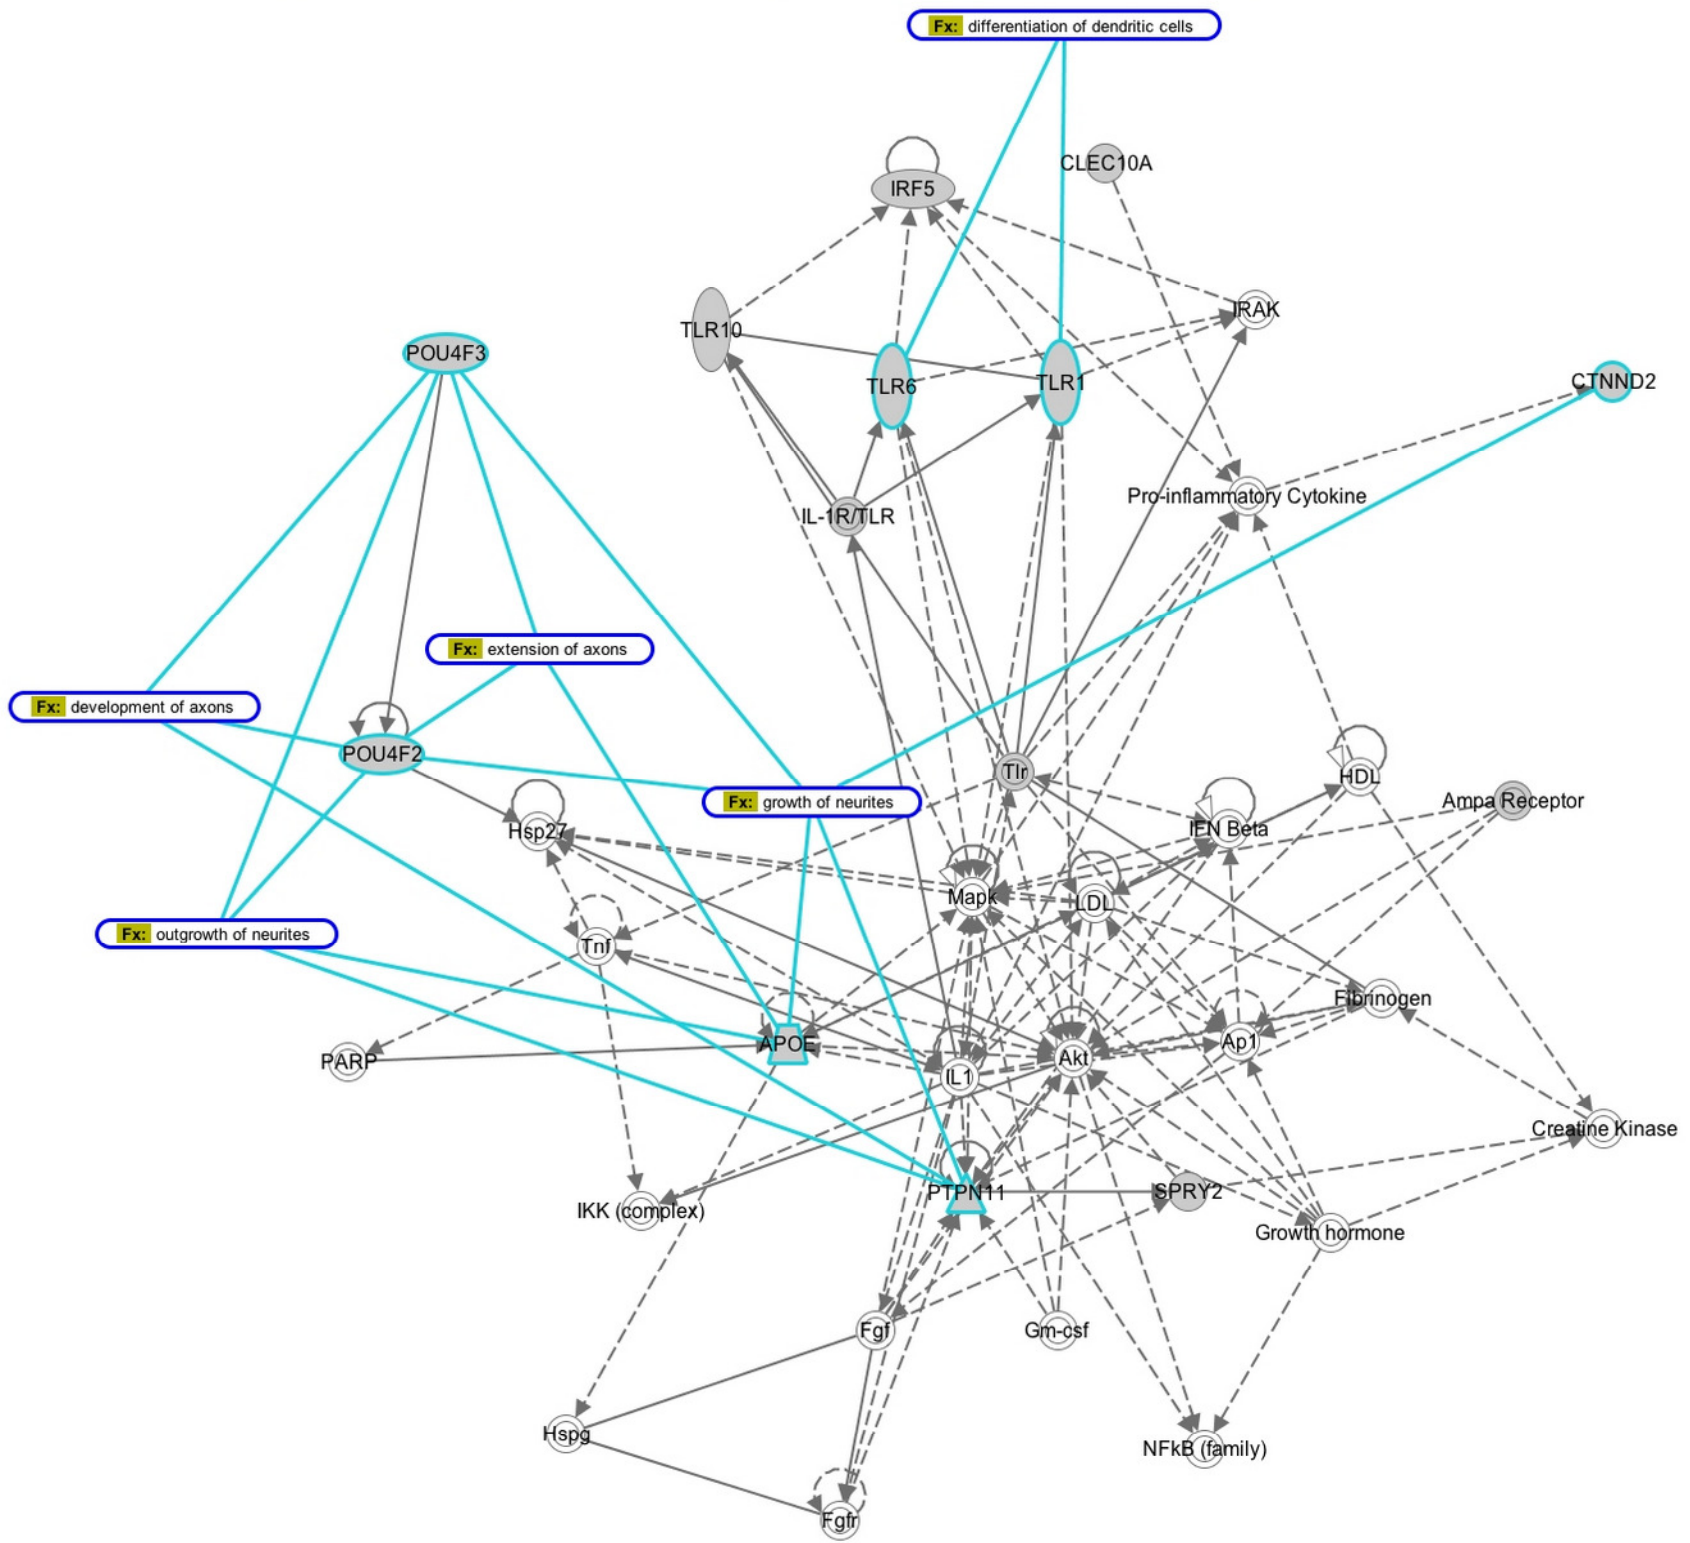



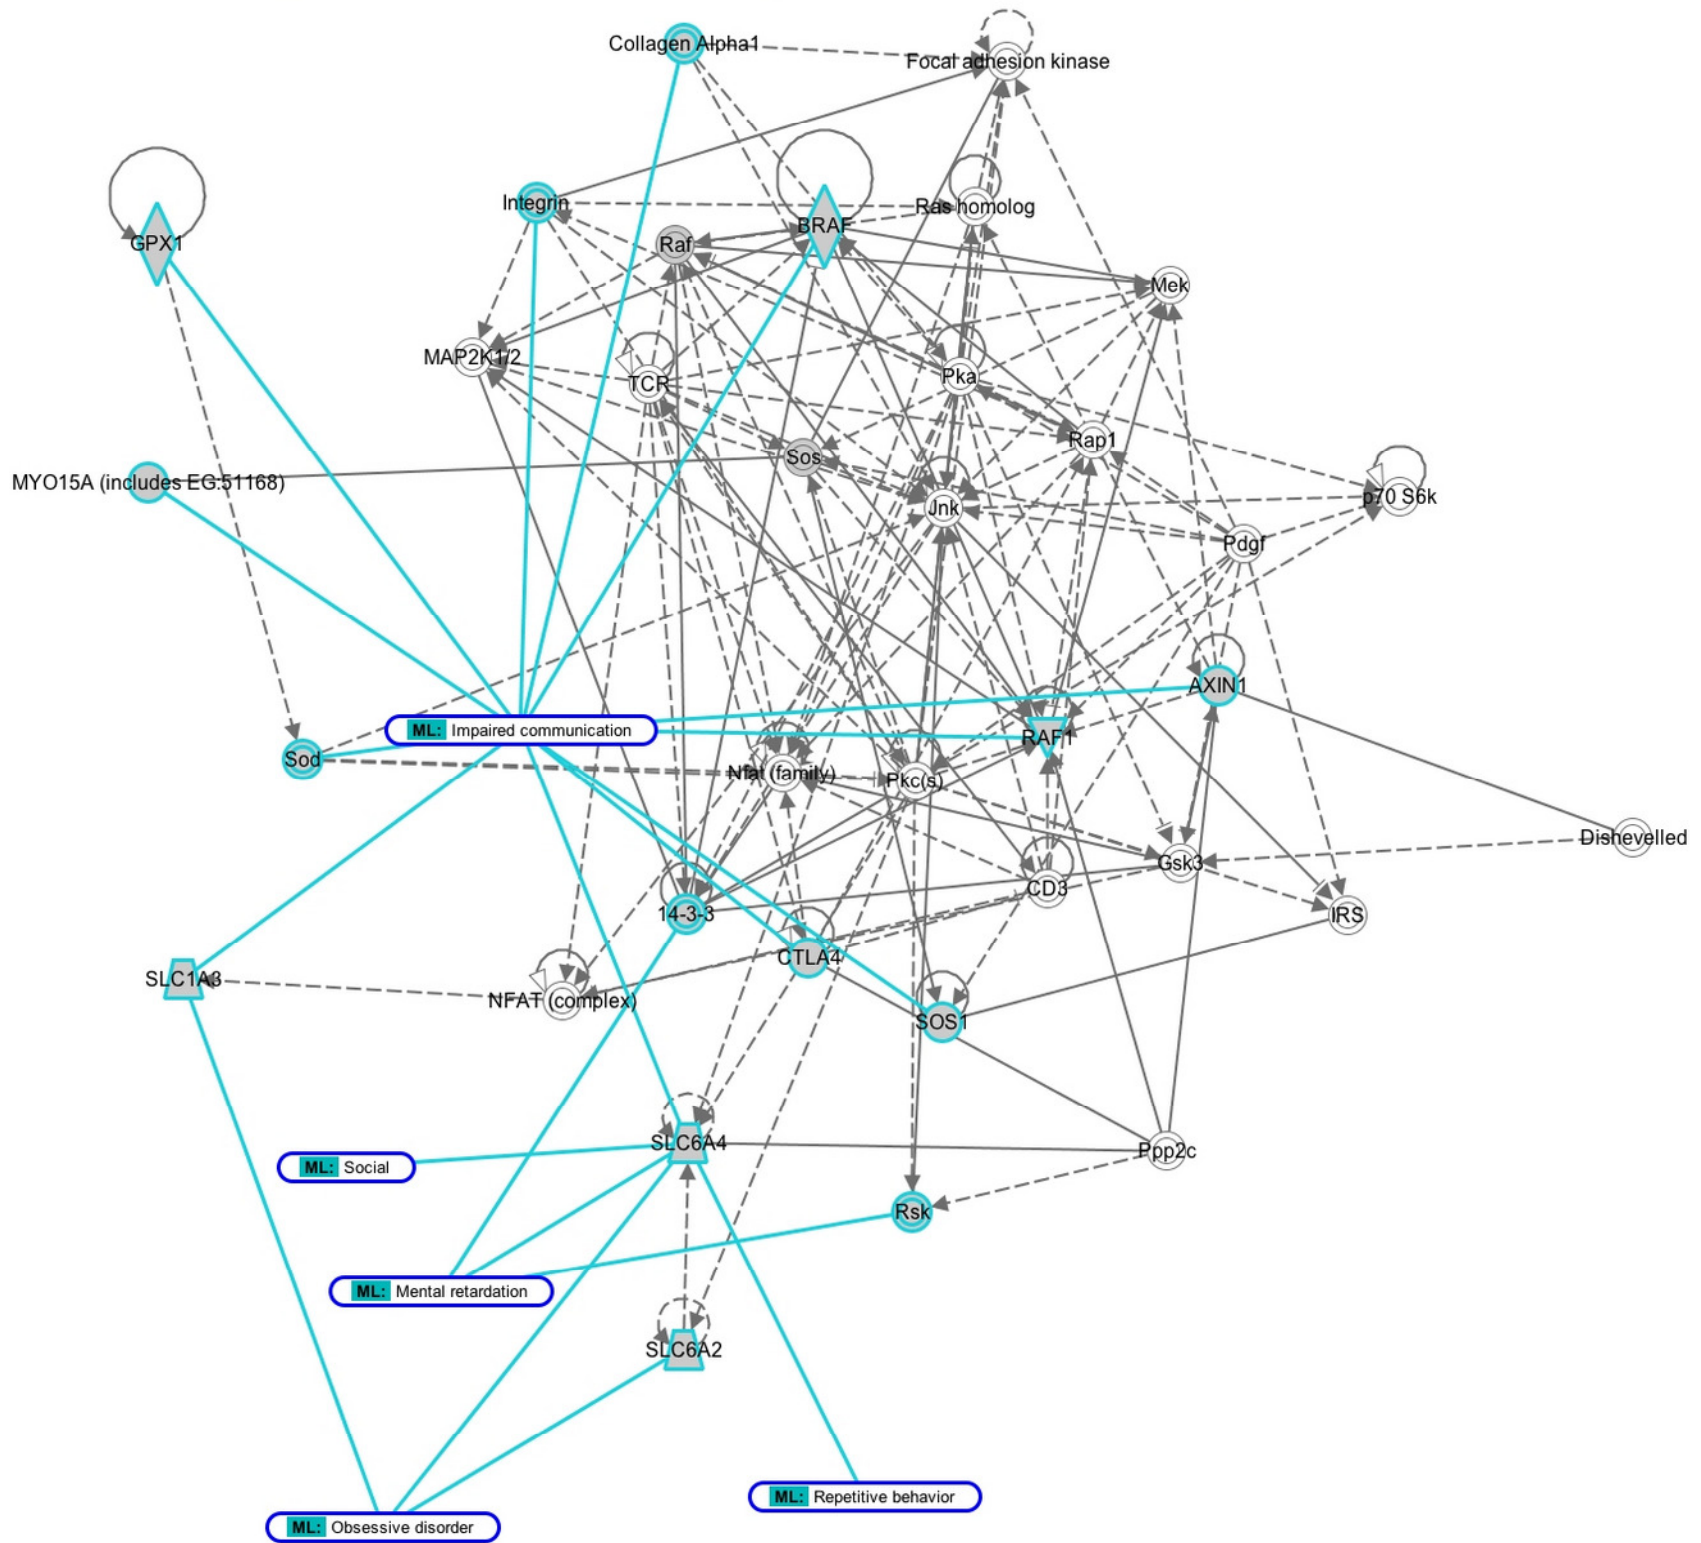

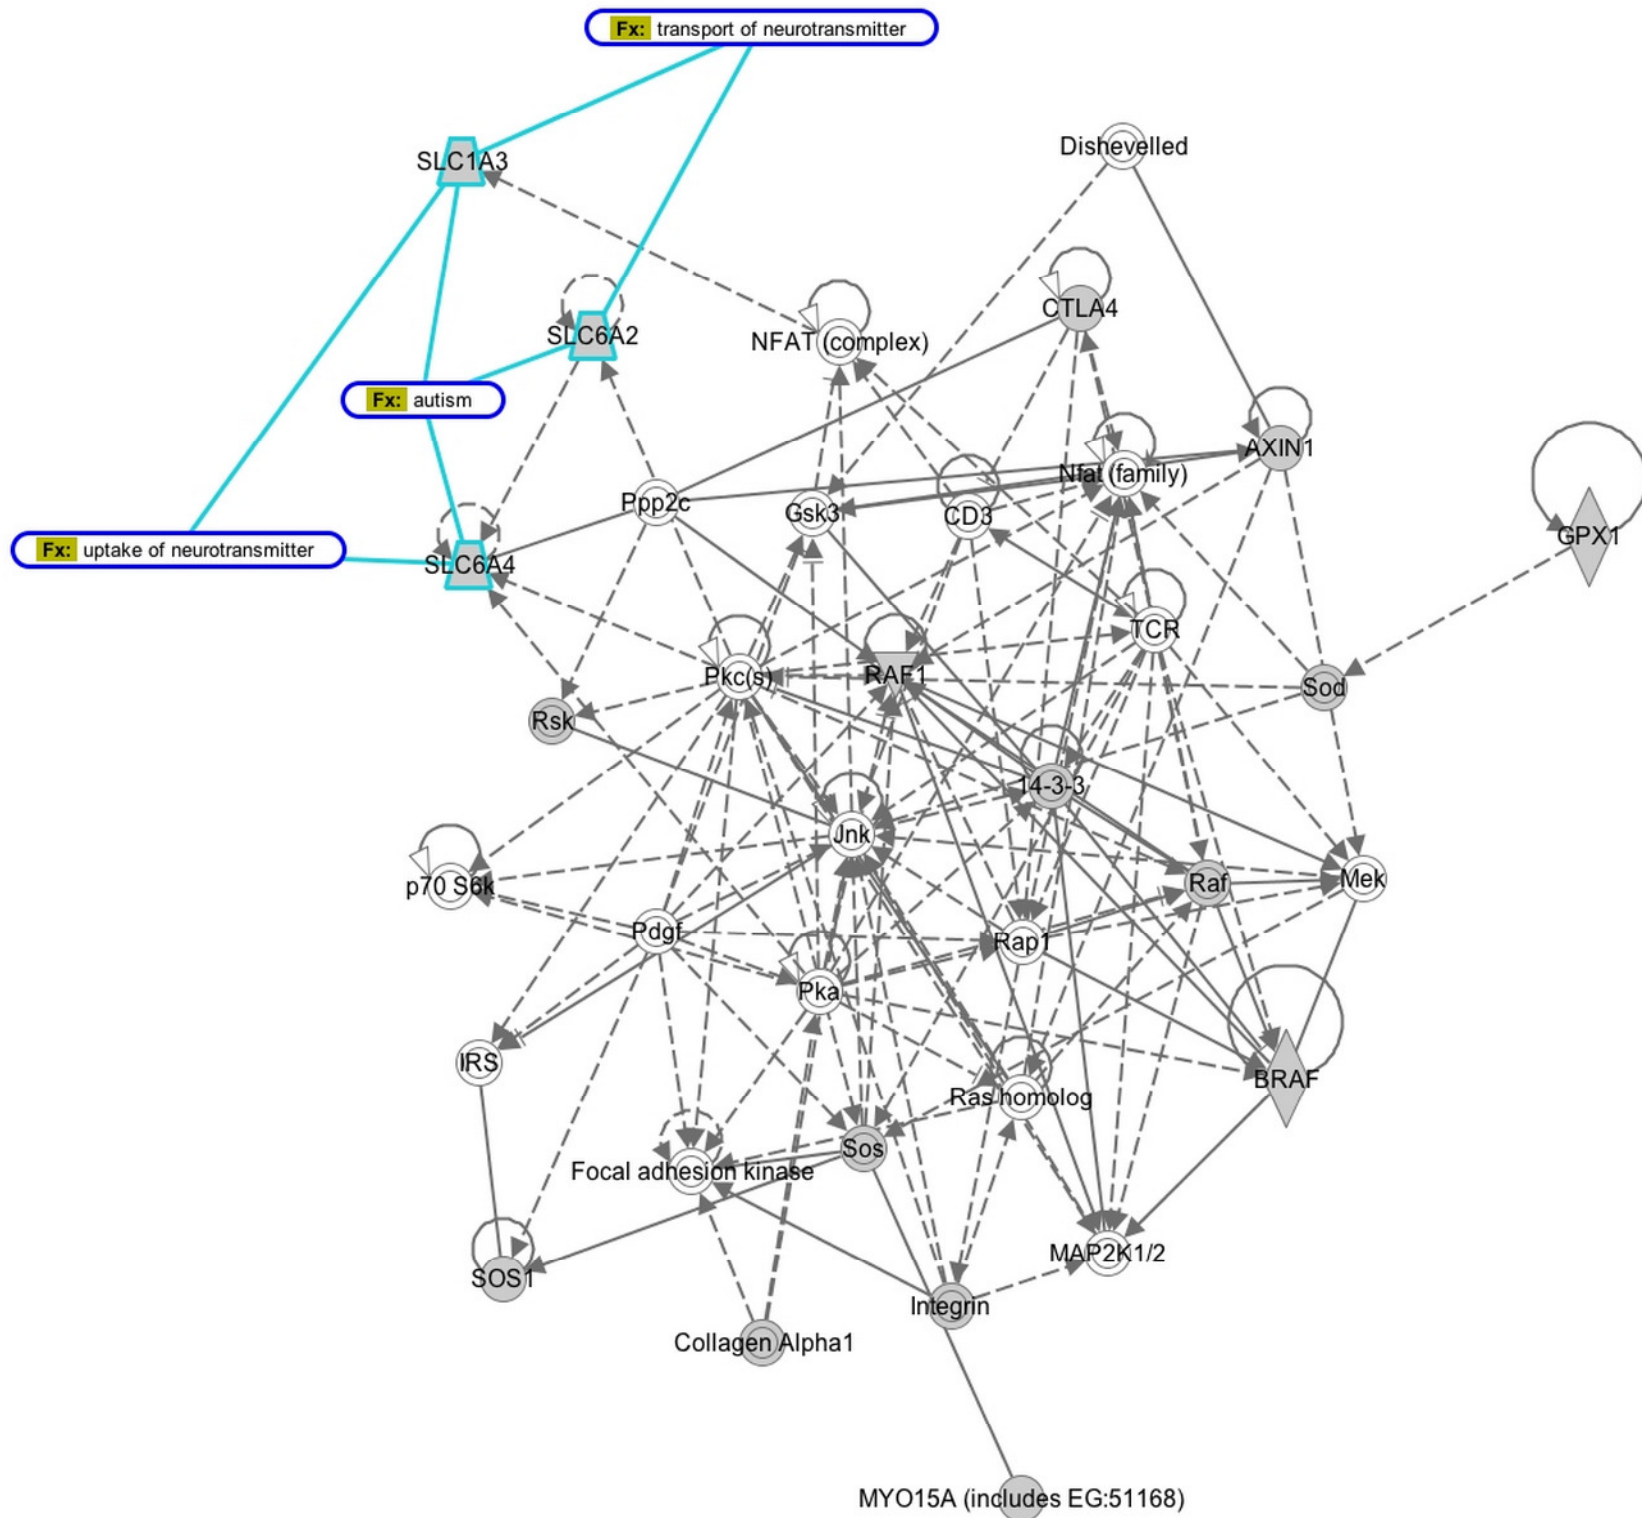





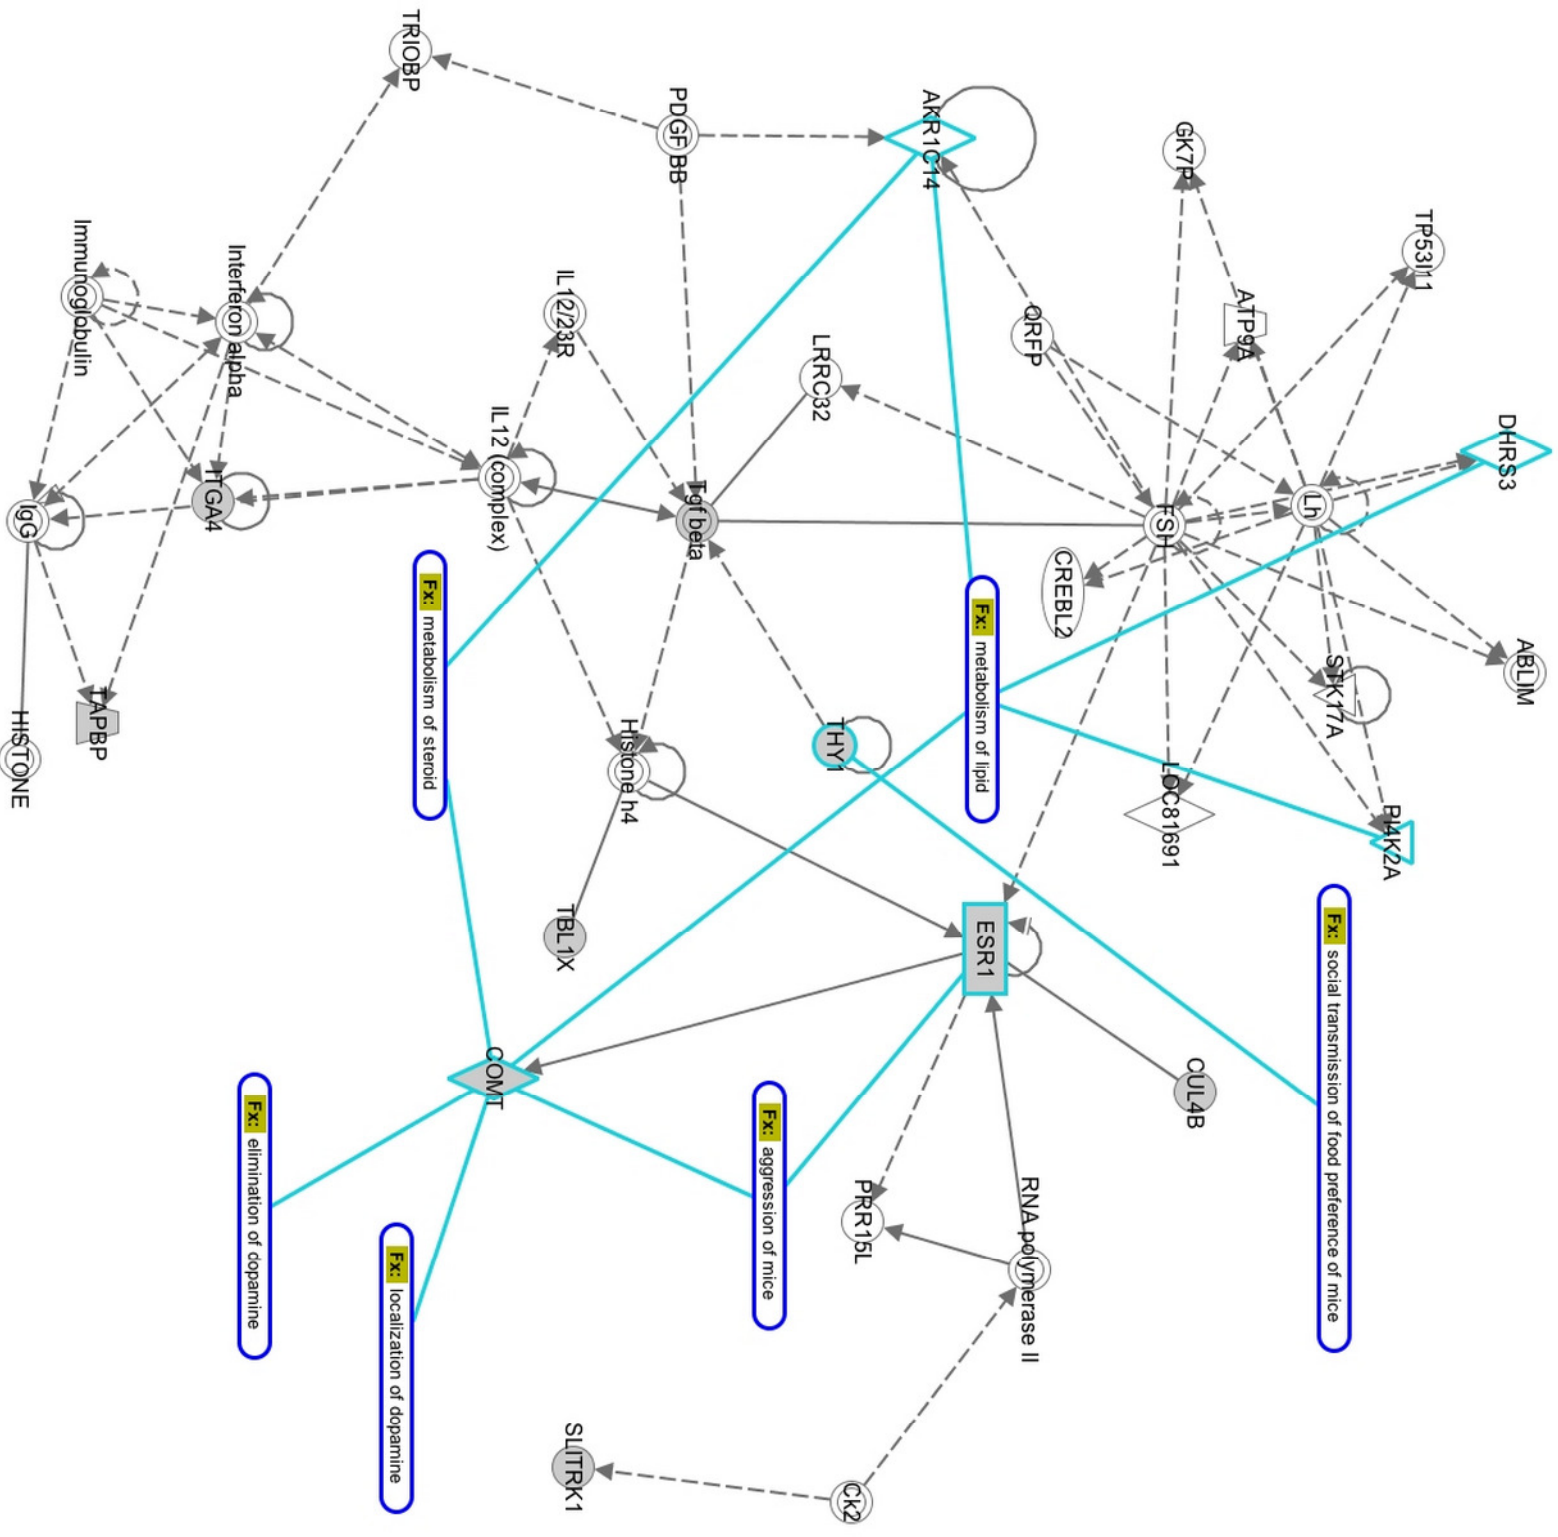

# Legend

**Edge Labels**

|          |                                   |
|----------|-----------------------------------|
| <b>A</b> | Activation/deactivation           |
| <b>B</b> | Binding                           |
| <b>E</b> | Expression                        |
| <b>I</b> | Inhibition                        |
| <b>L</b> | proteoLysis                       |
| <b>M</b> | biochemical <b>M</b> odification  |
| <b>O</b> | Other                             |
| <b>P</b> | Phosphorylation/dephosphorylation |
| <b>T</b> | Transcription                     |

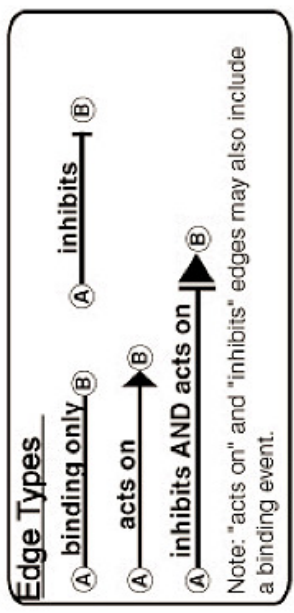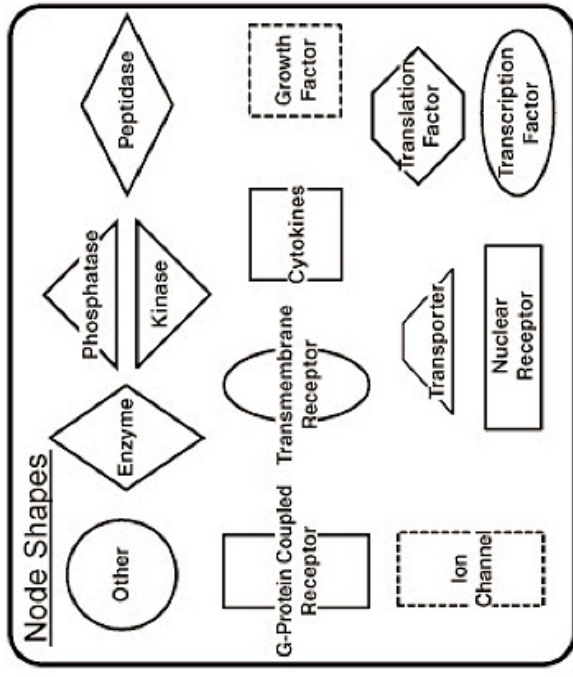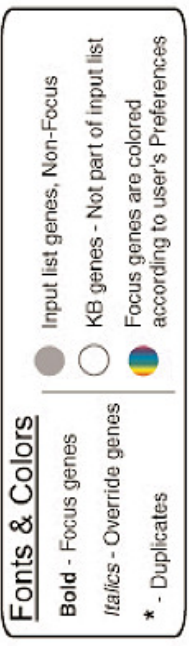

Supplement: NIHMS357028-supplement-01.pdf [file NIHMS357028-supplement-01.pdf]
