# Supplementary material
Source: PubMed Central journal article supplement (PMC3303594)

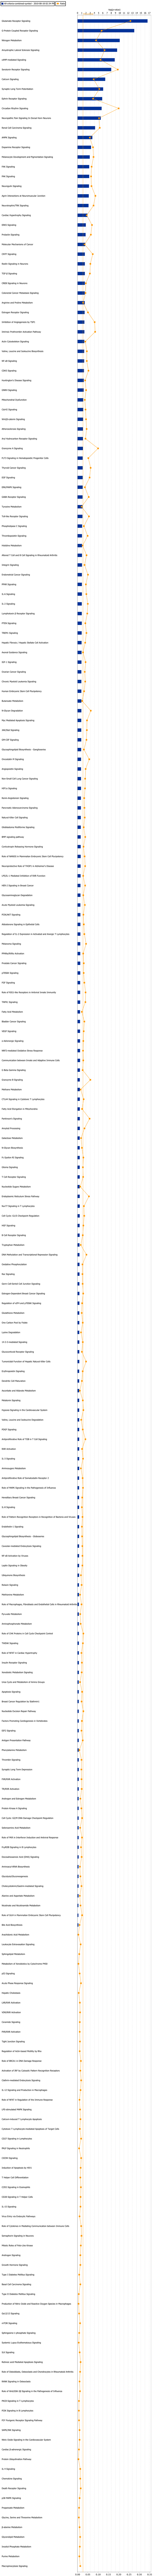

Supplement: NIHMS357028-supplement-02.pdf [file NIHMS357028-supplement-02.pdf]

# Generating novel insights from CNV using CNN analysis

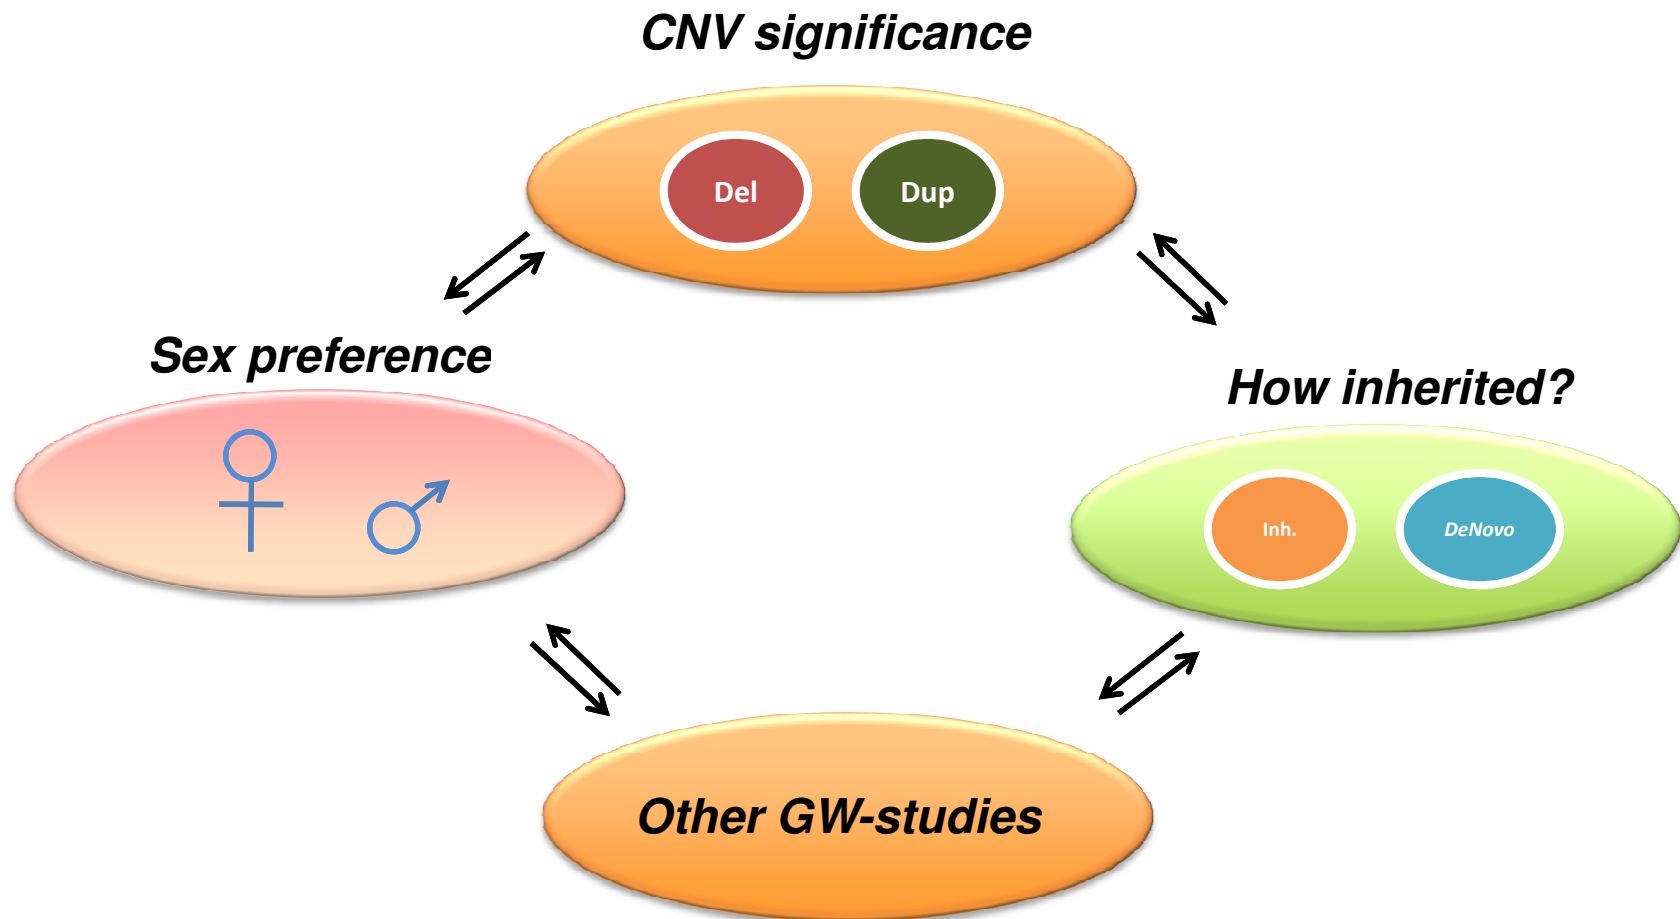

## Novel node design for CNV data analysis

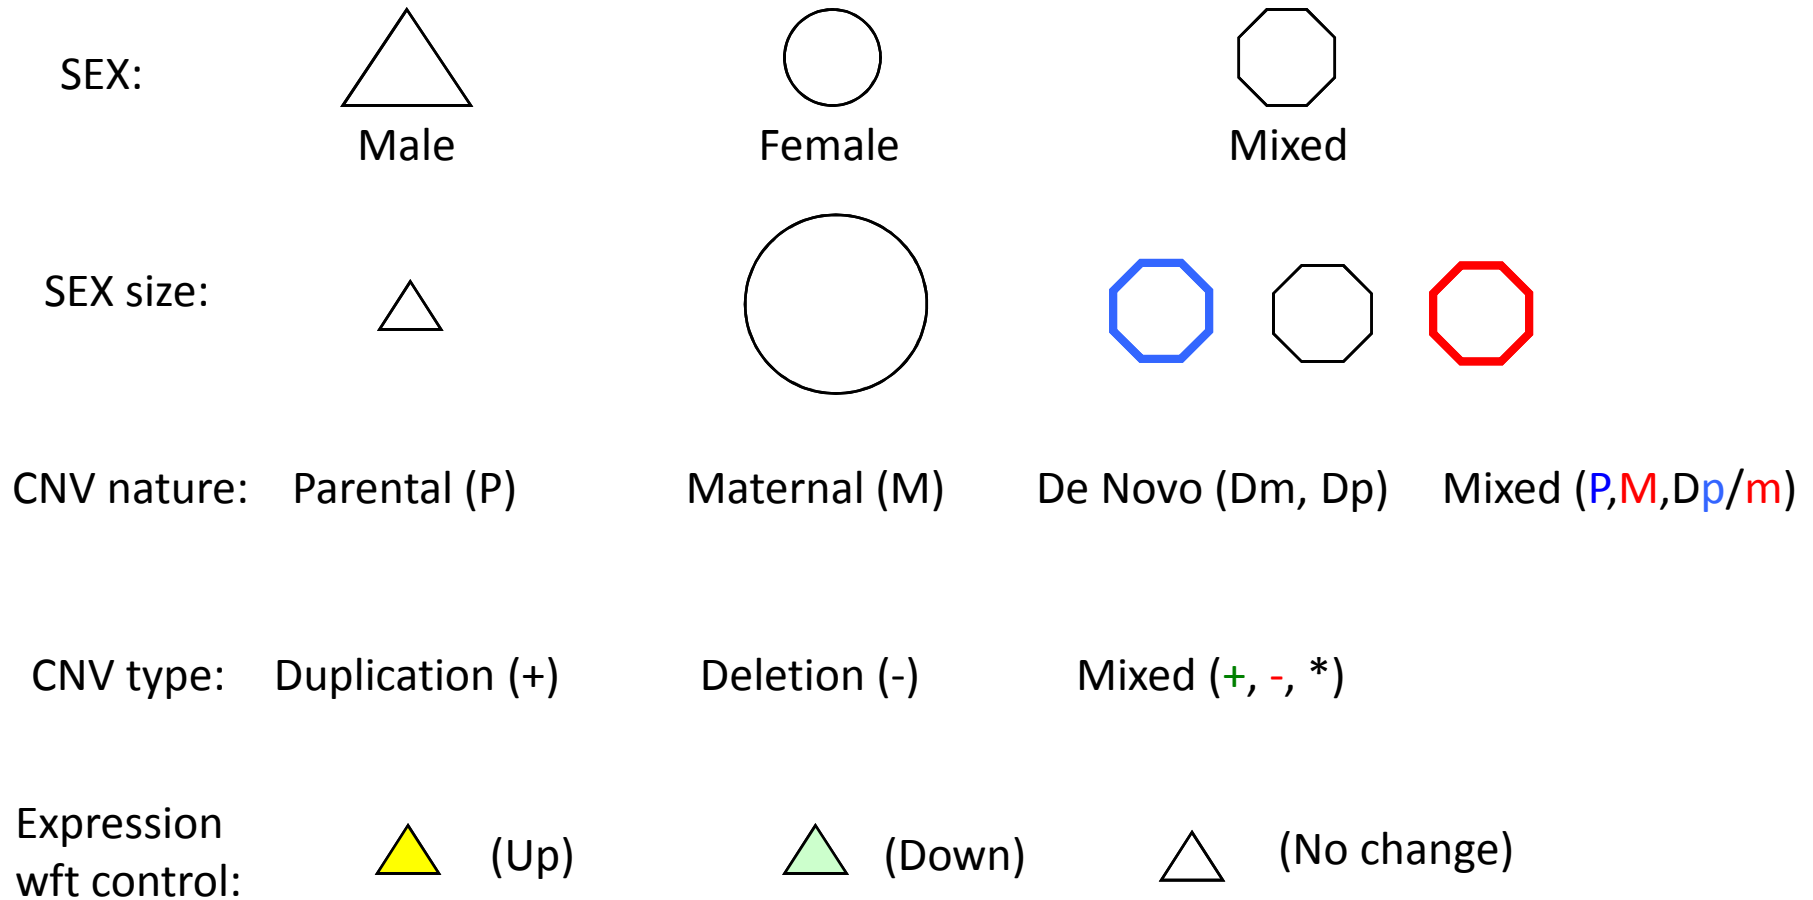

Supplement: NIHMS357028-supplement-03.pdf [file NIHMS357028-supplement-03.pdf]
